# Supplementary figures and images for: Evaluation of the reflectivity calibration of W-band radars based on observations in rain
Source: Copernicus journal article supplement (doi:10.5194/amt-2020-133), 2020-04-21

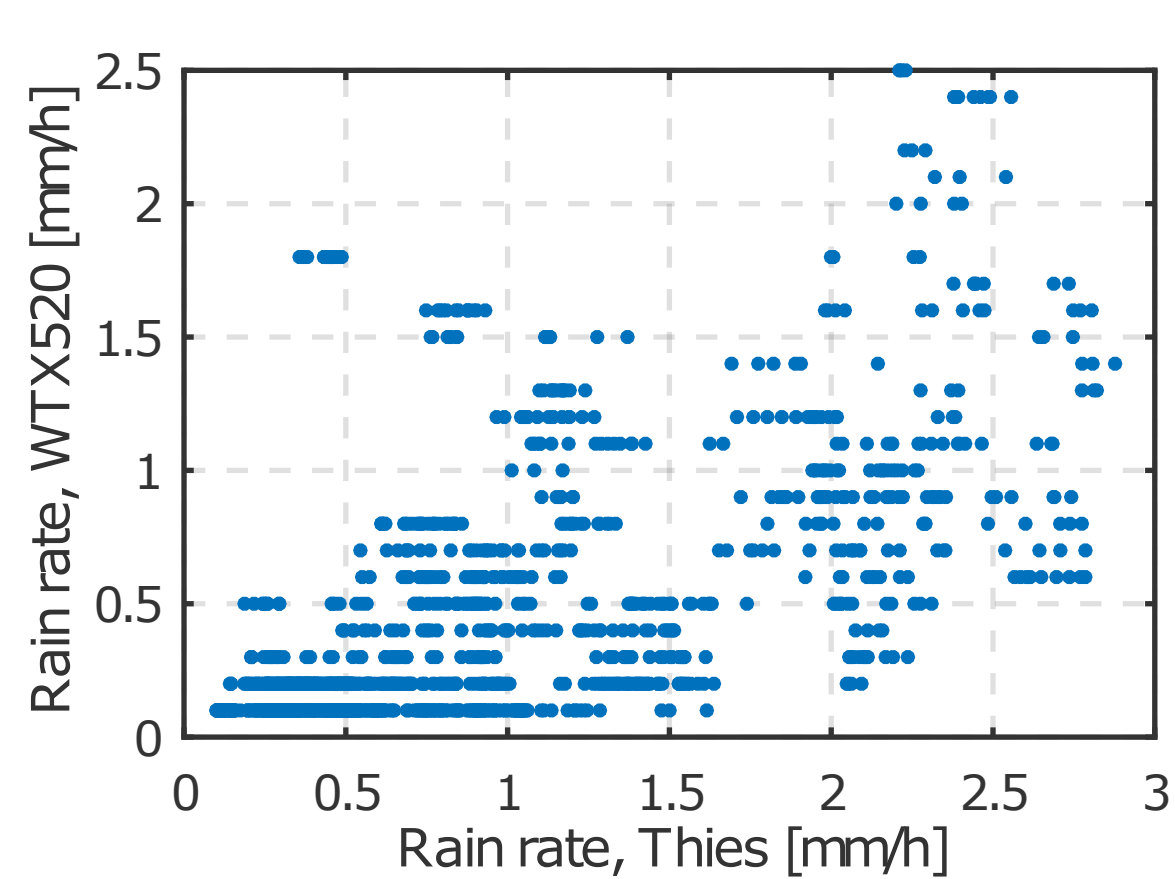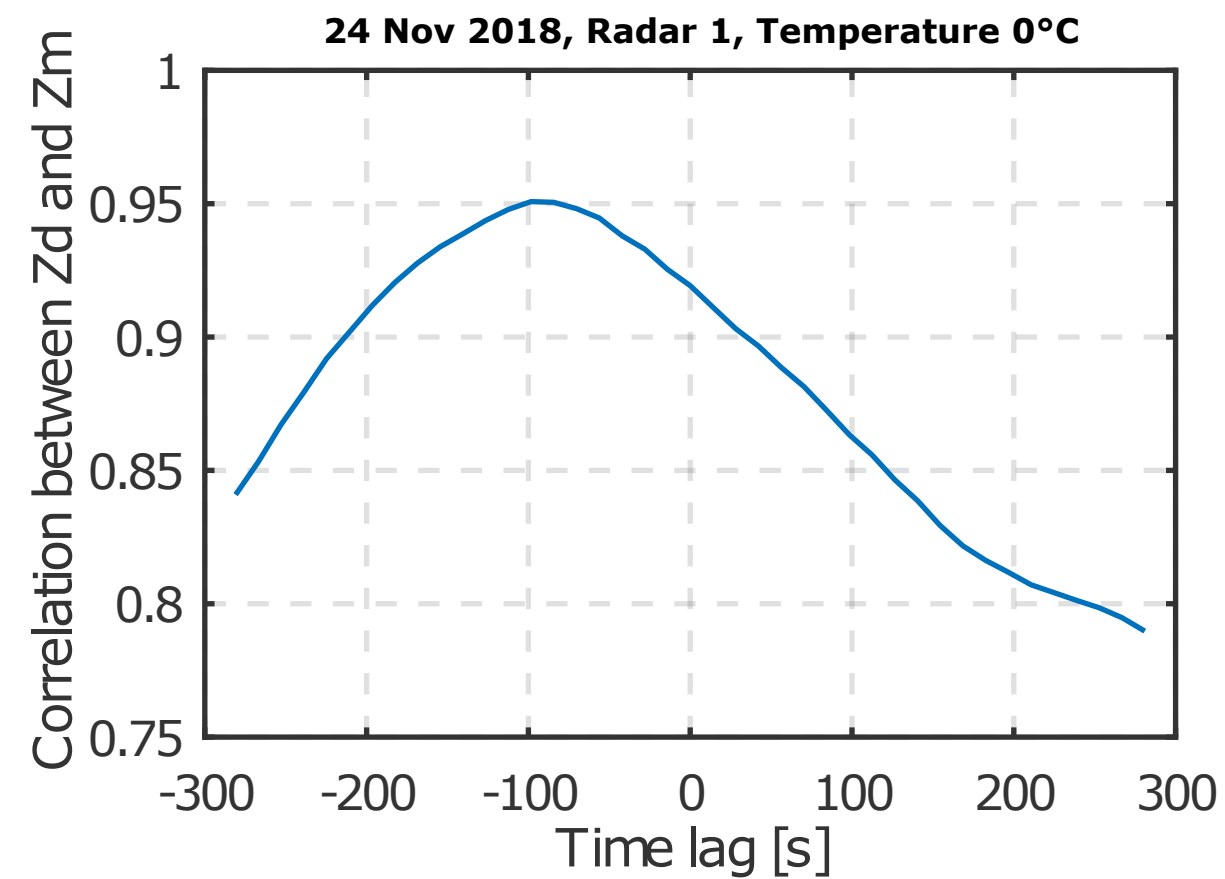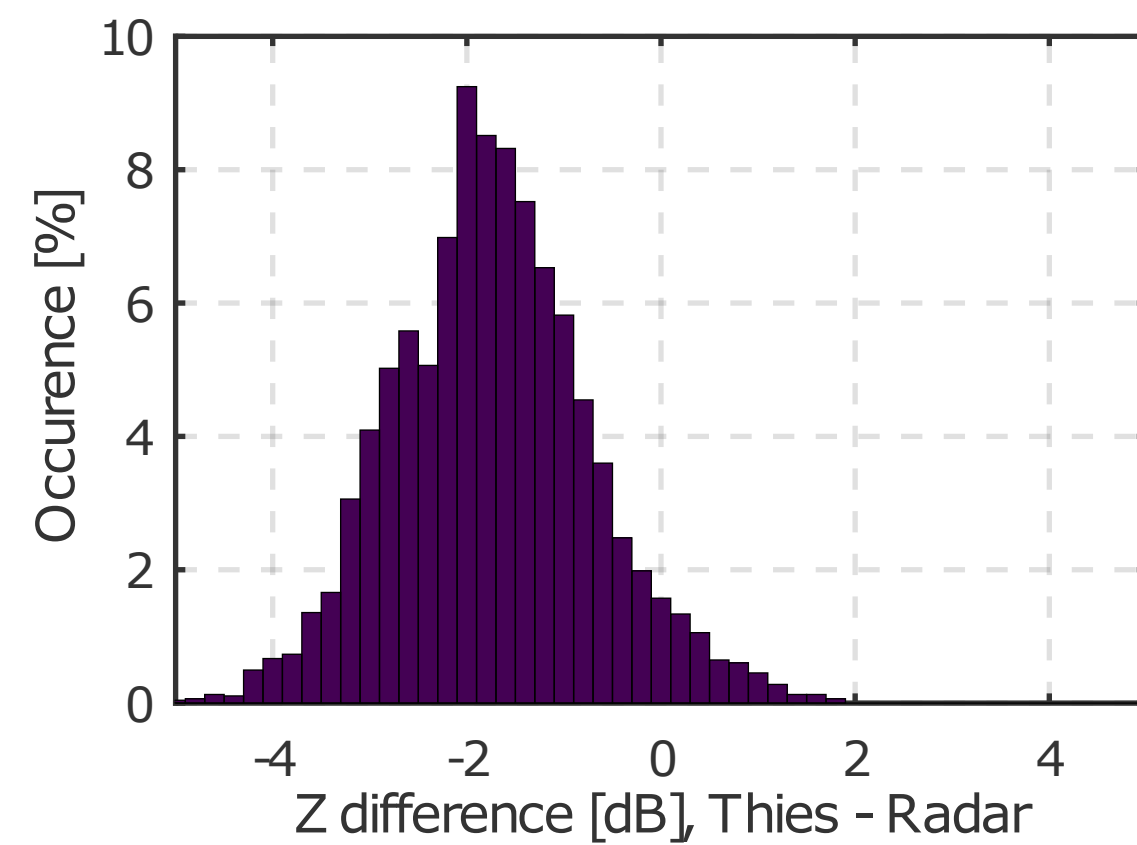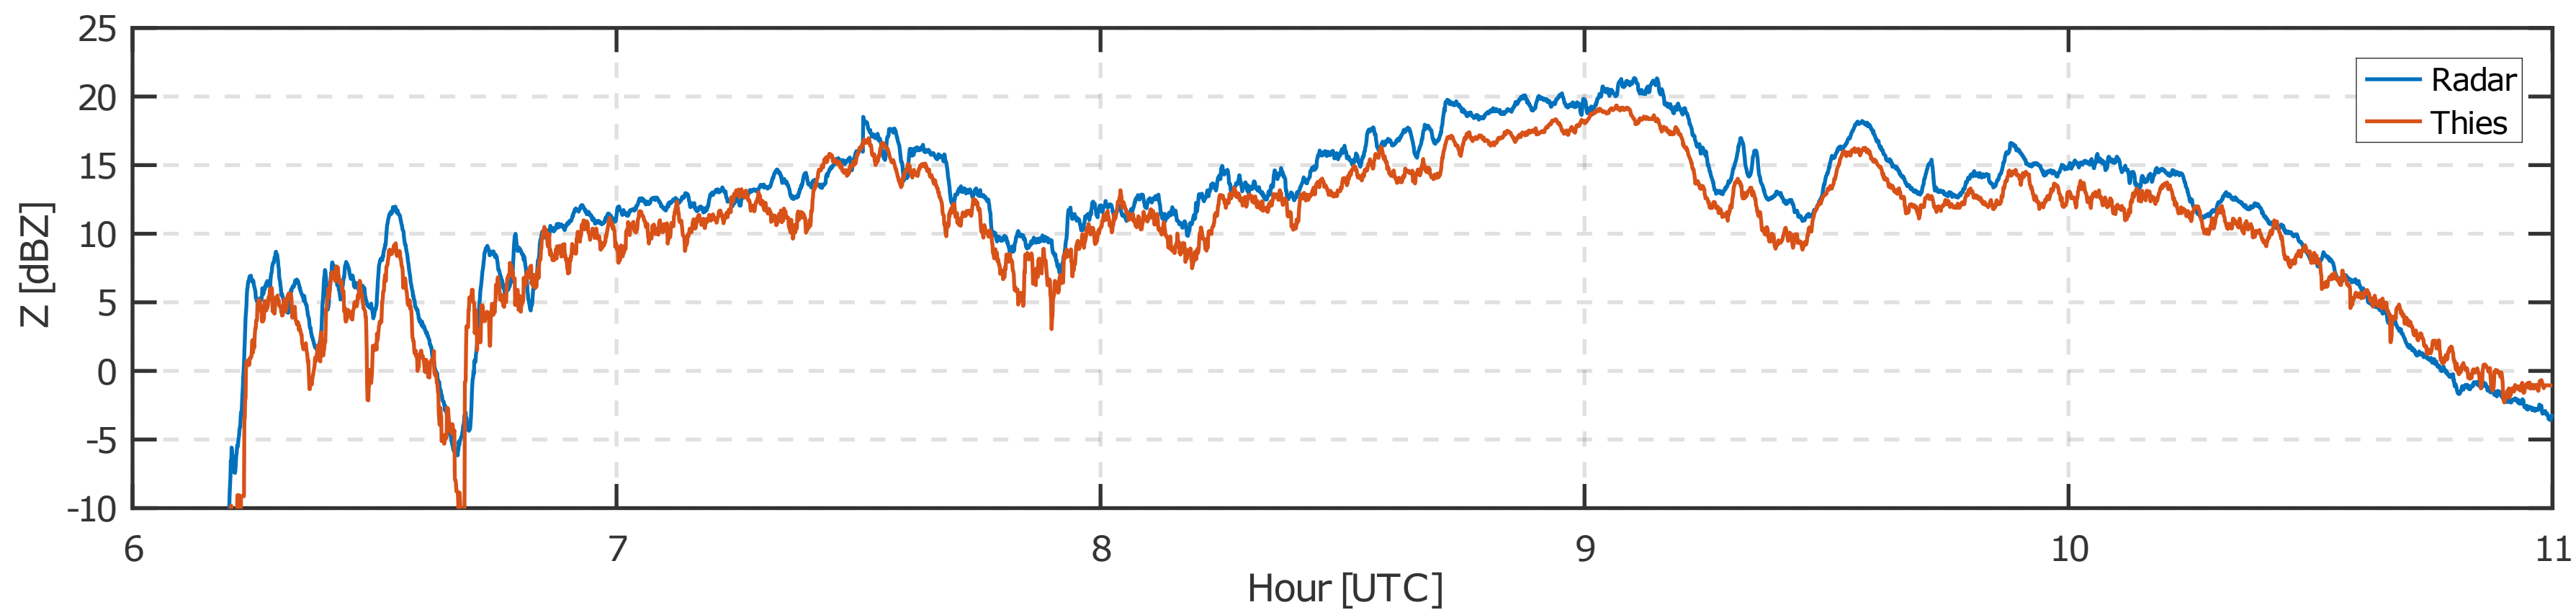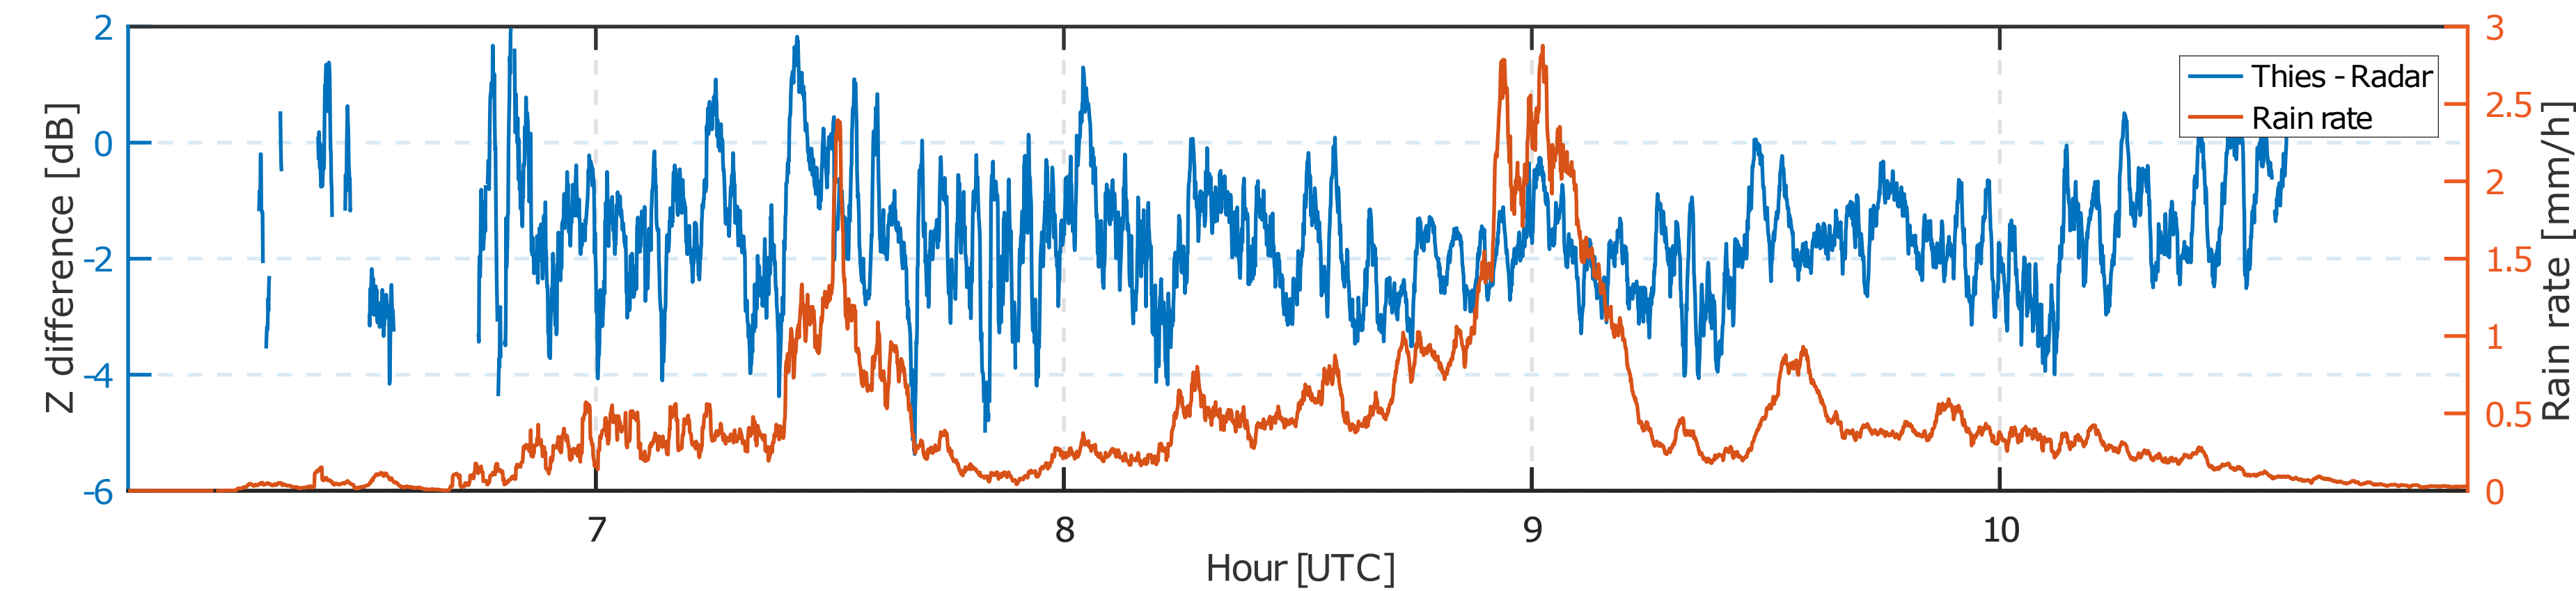

Supplement: Supplementary file 1 [file amt-2020-133-supplement.zip]

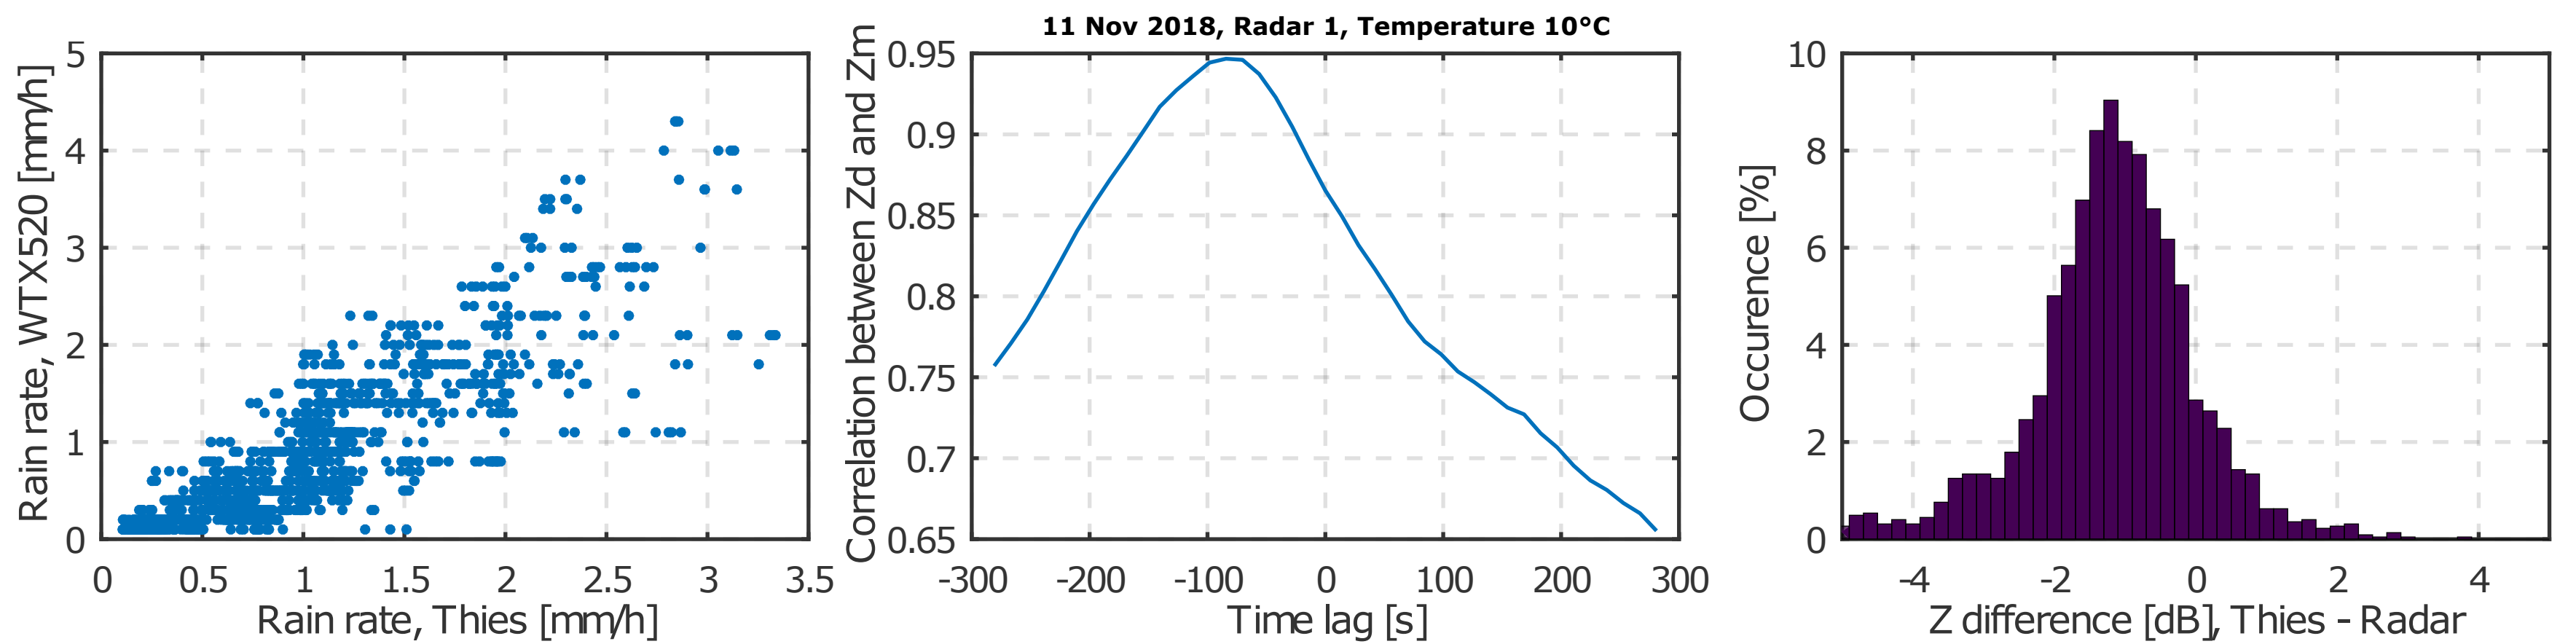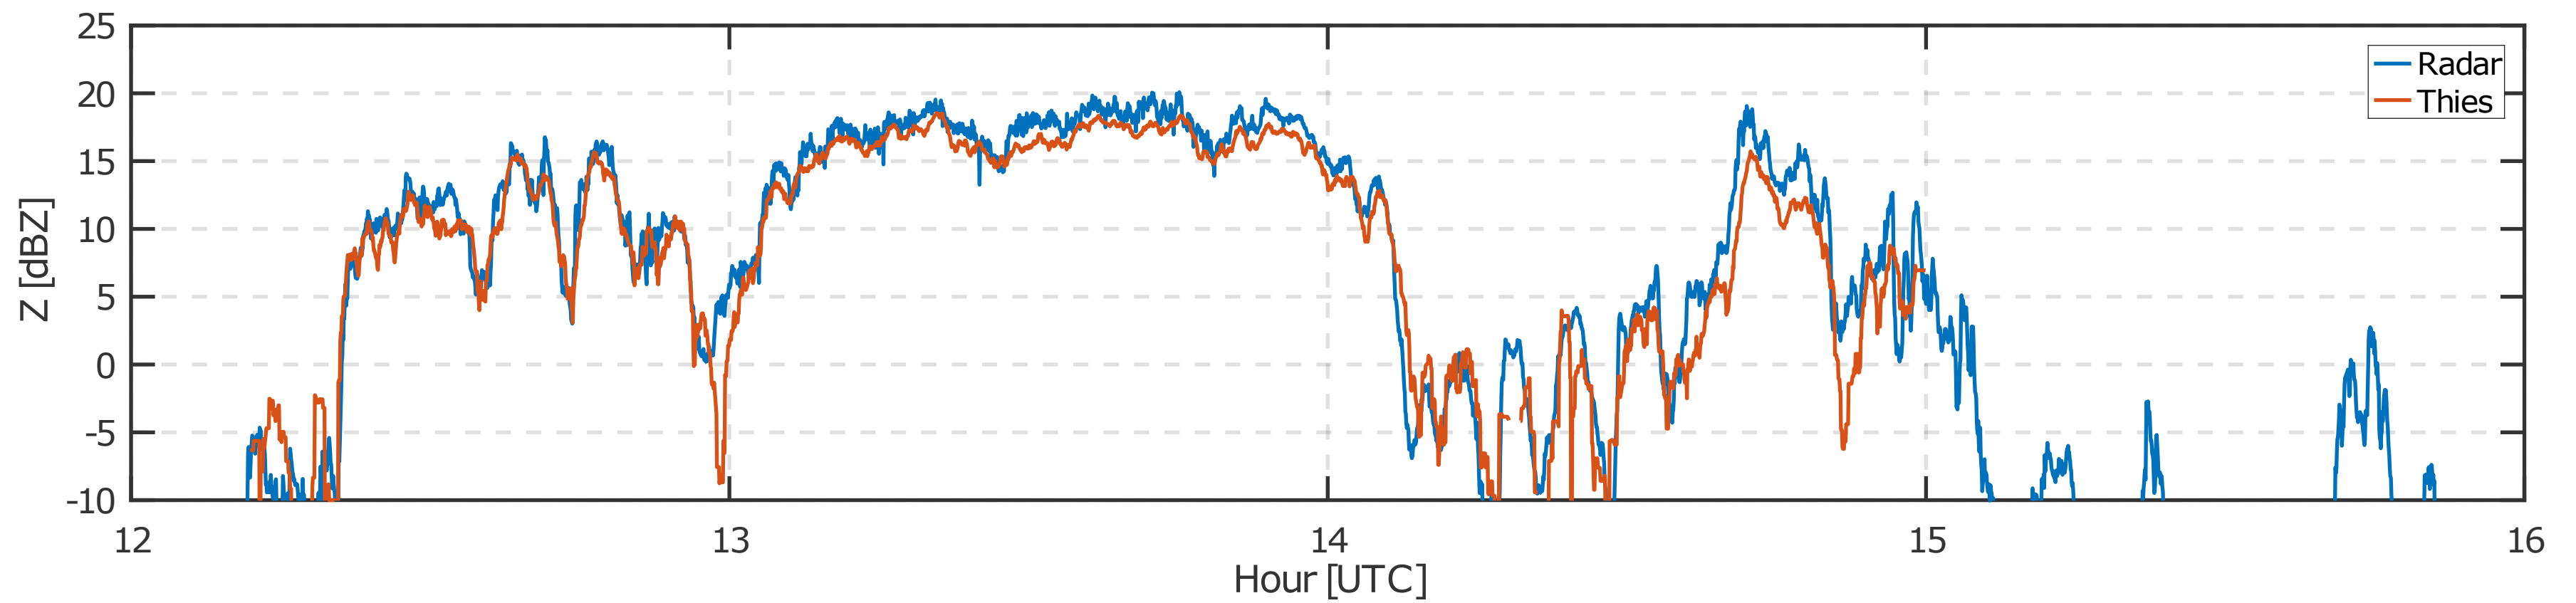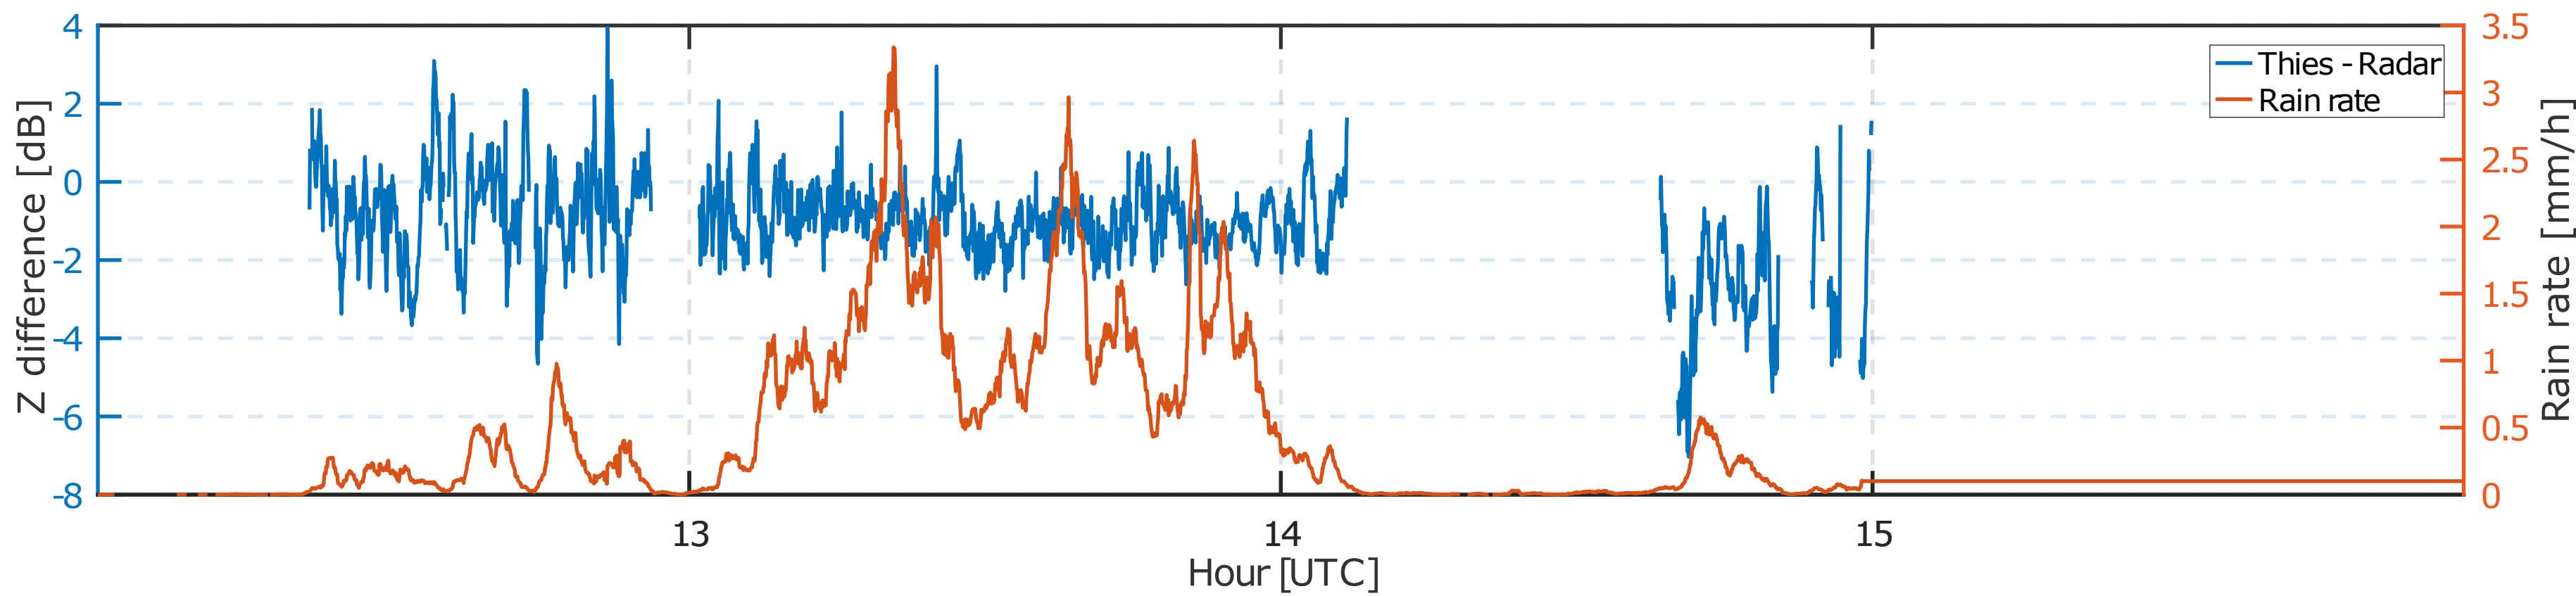

Supplement: Supplementary file 2 [file amt-2020-133-supplement.zip]

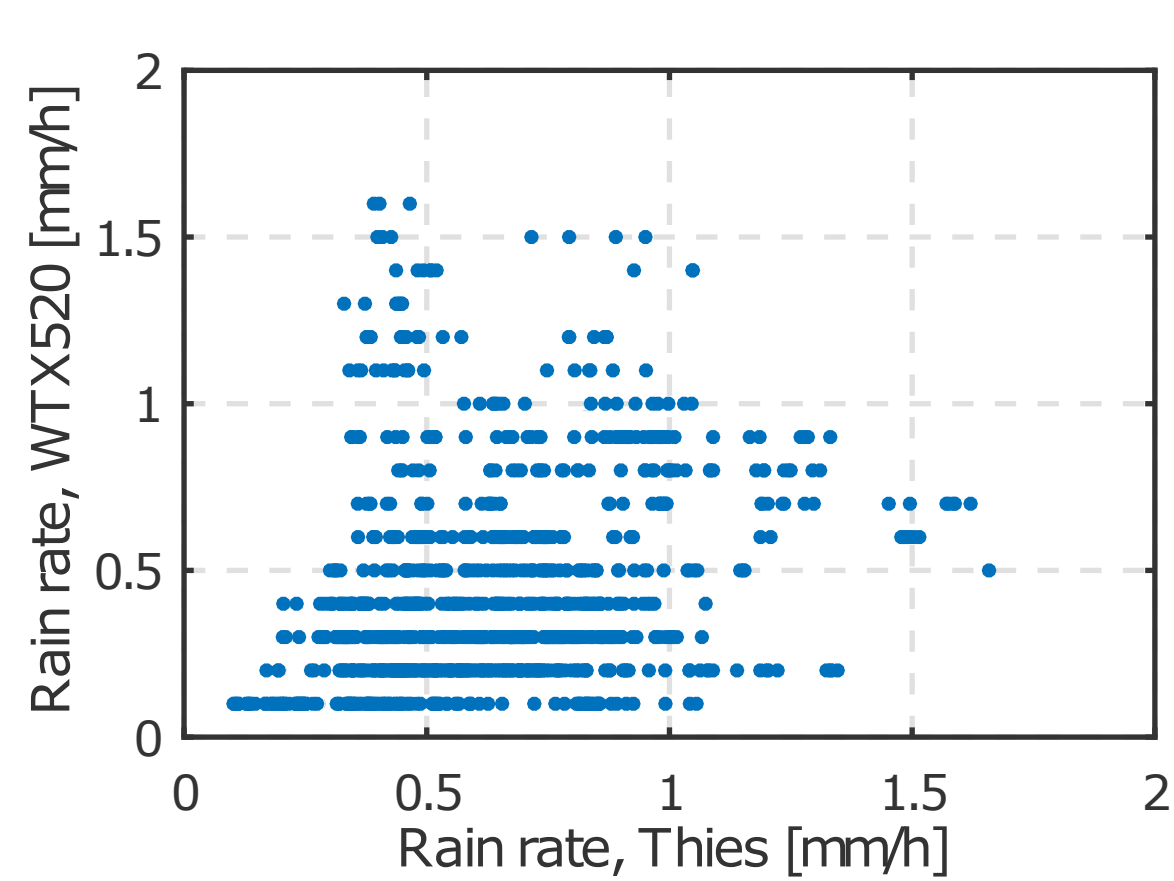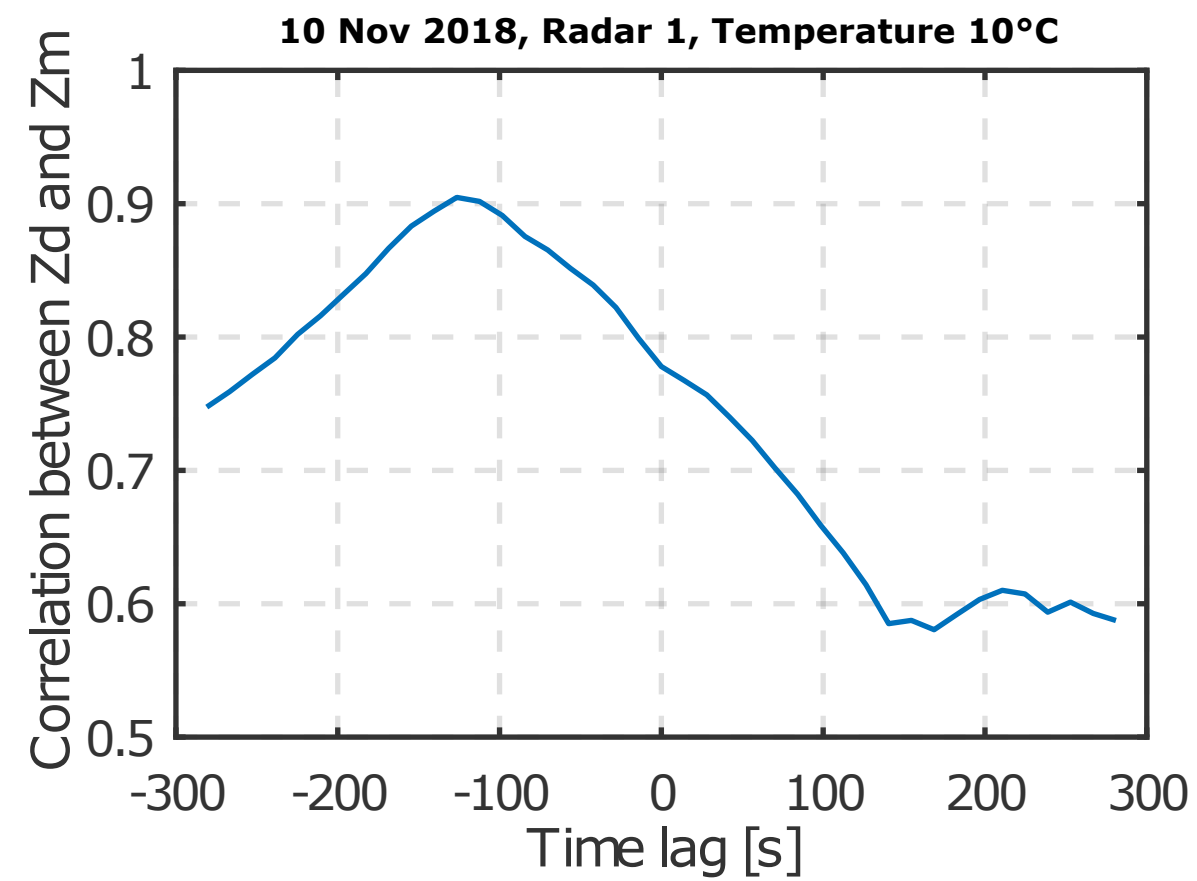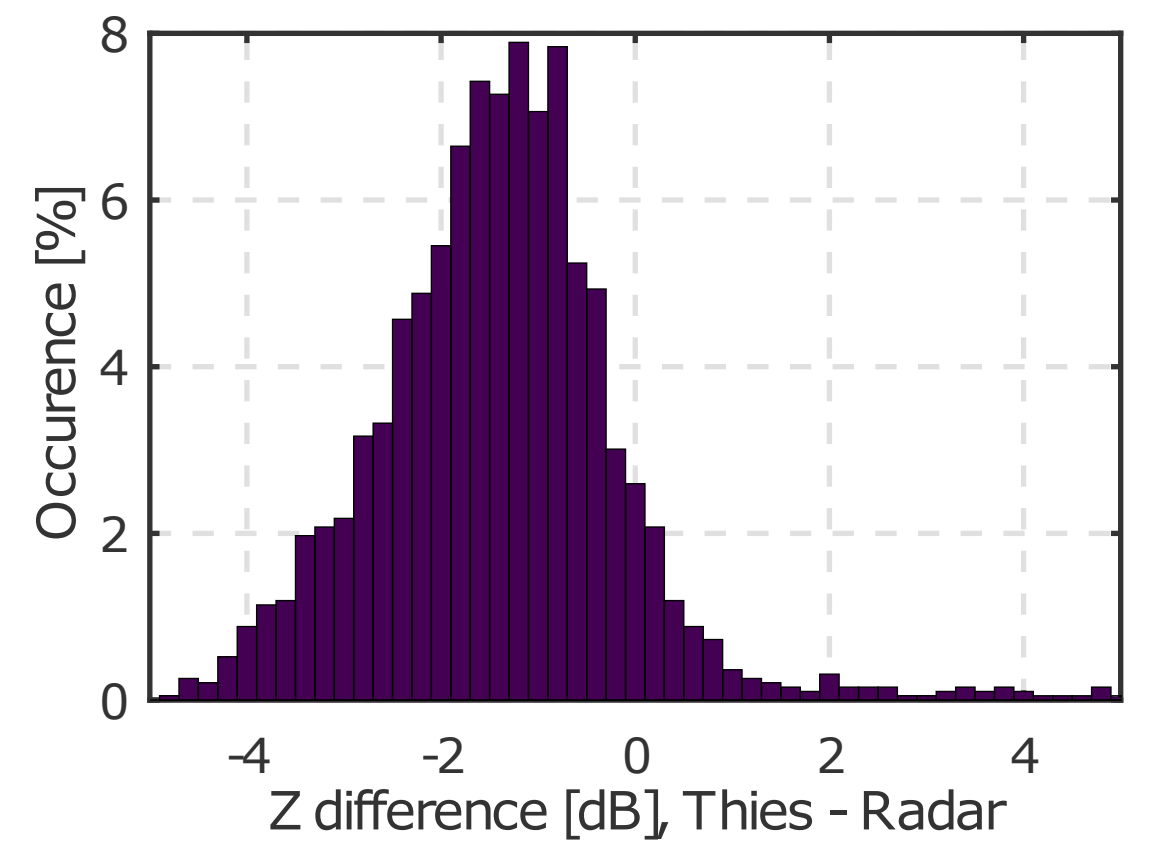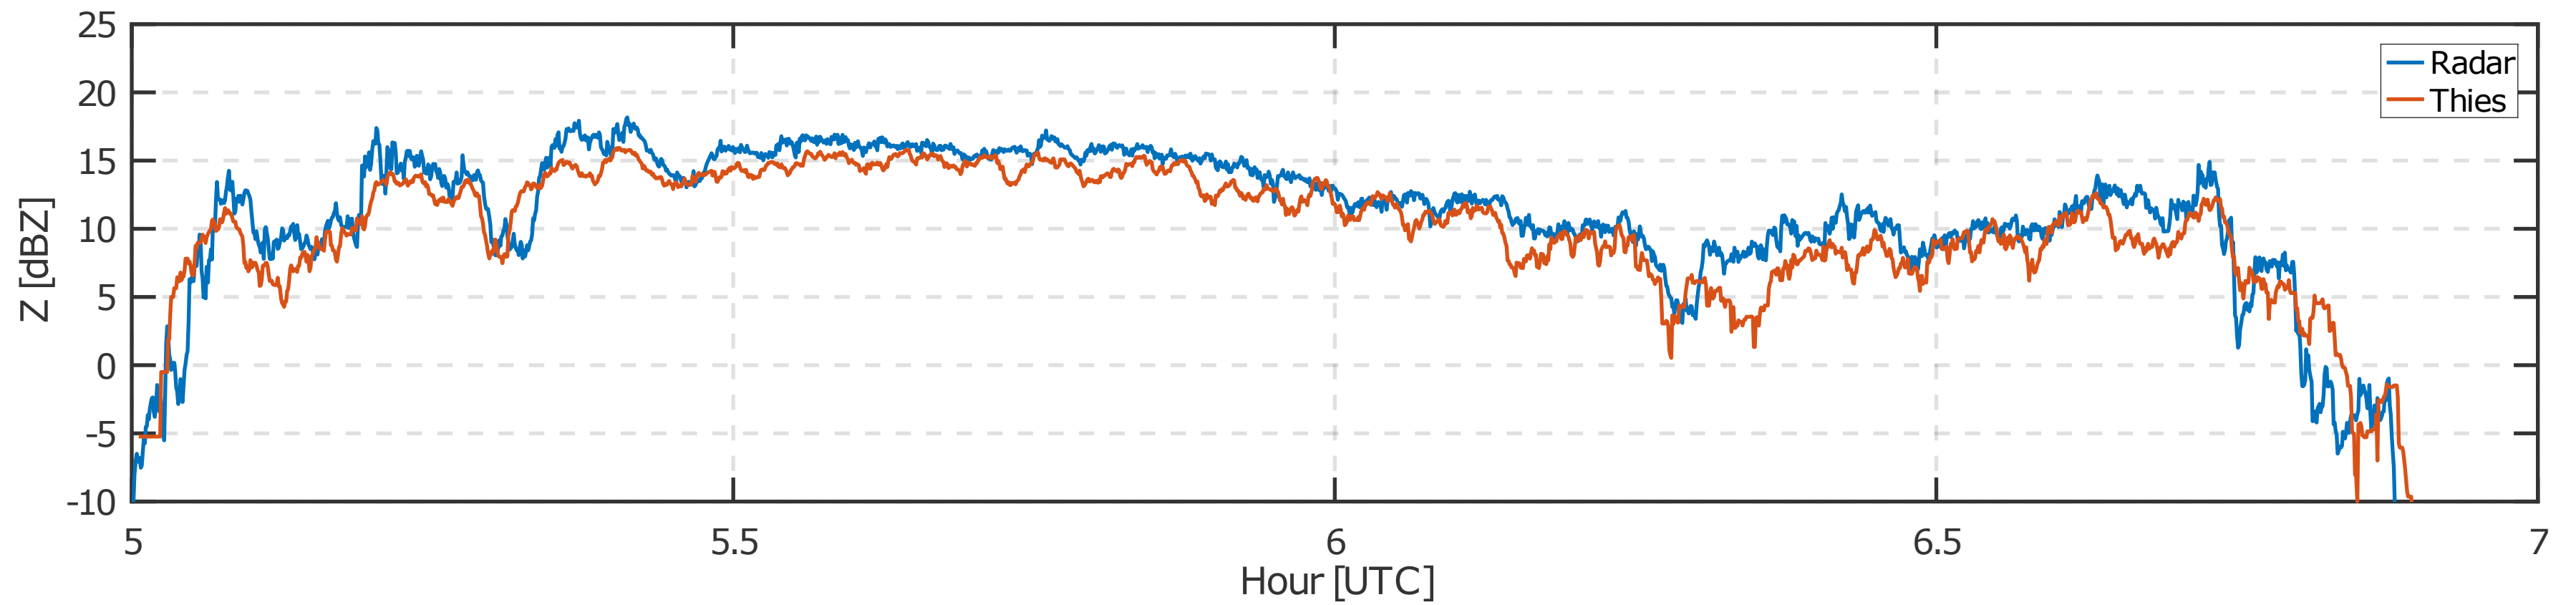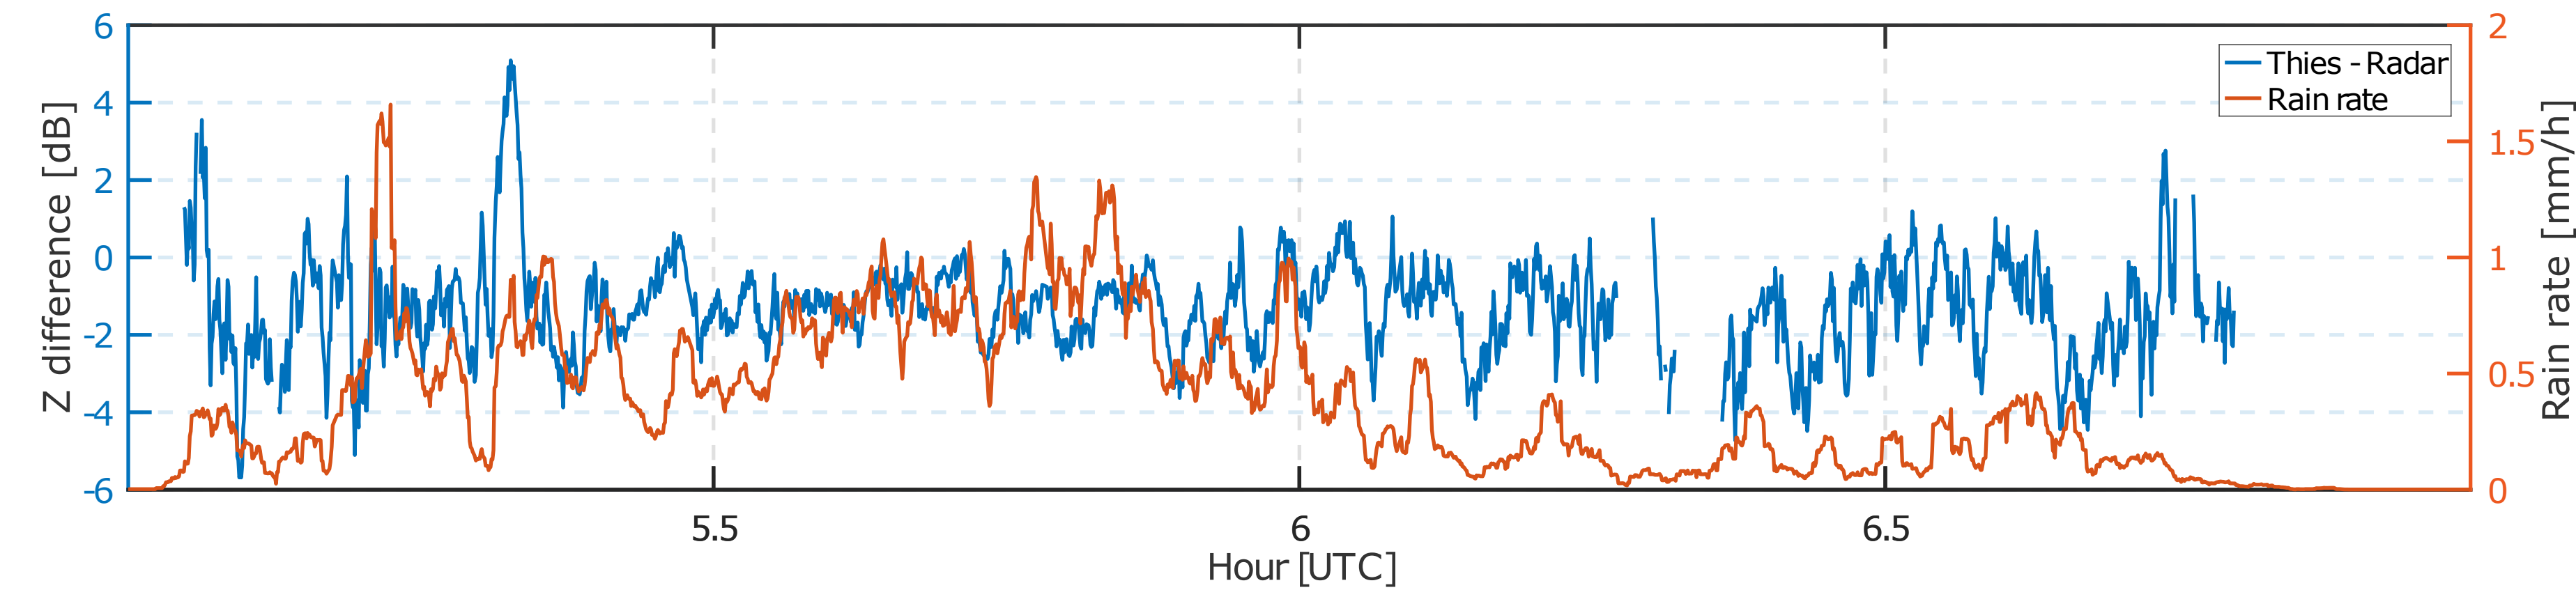

Supplement: Supplementary file 3 [file amt-2020-133-supplement.zip]

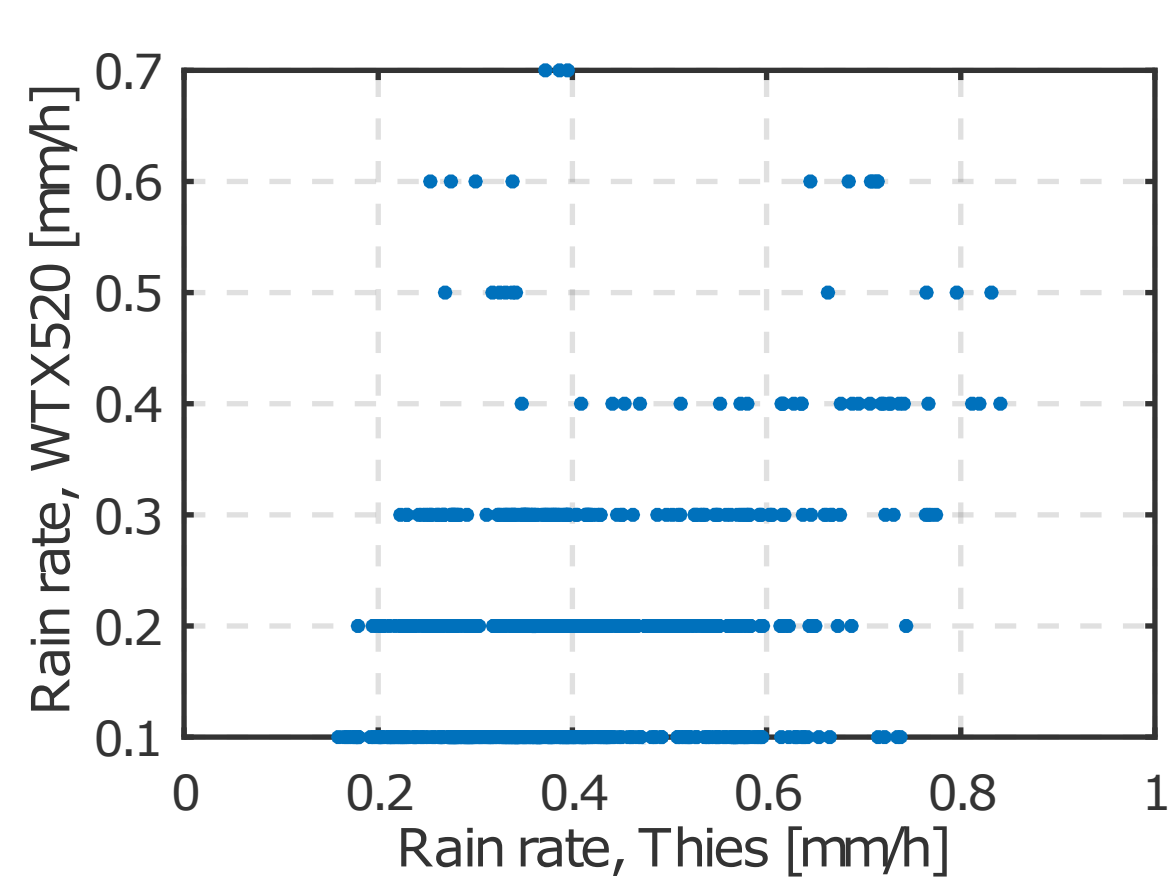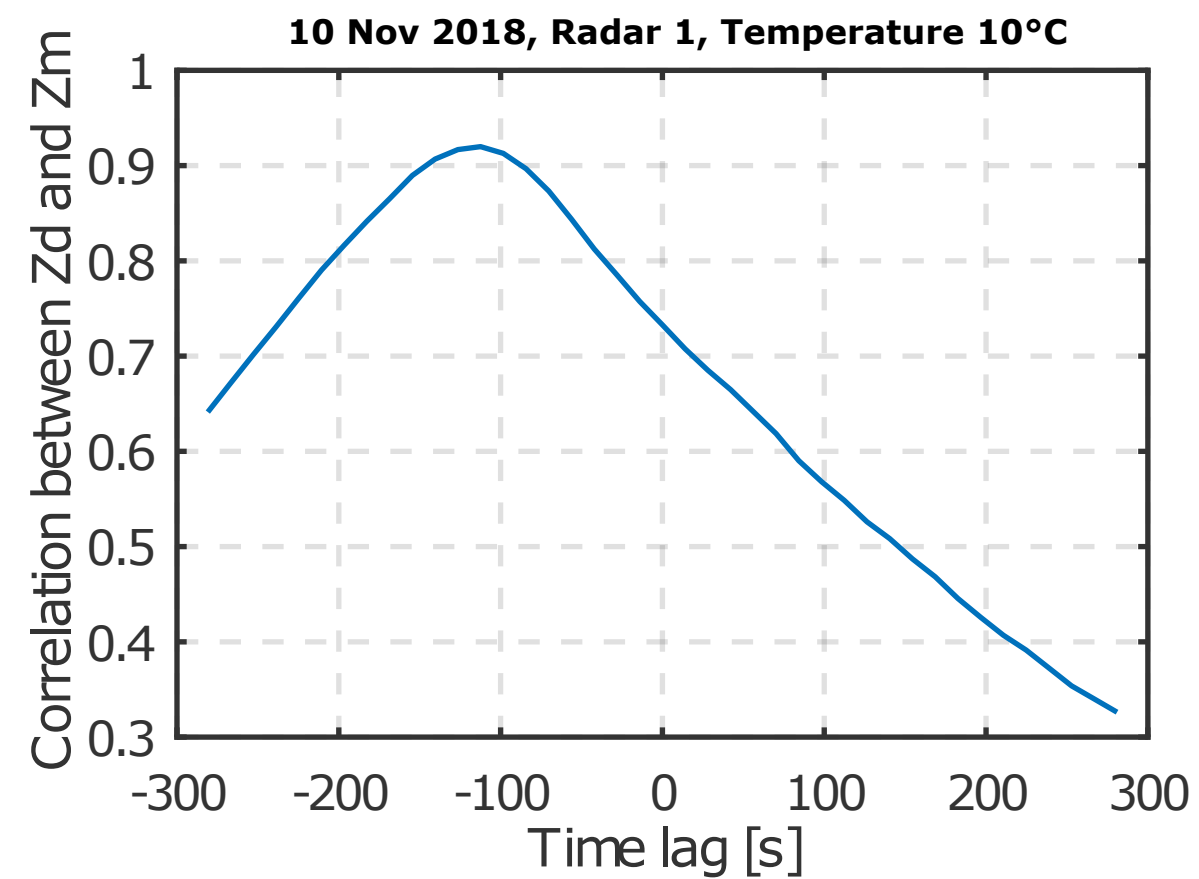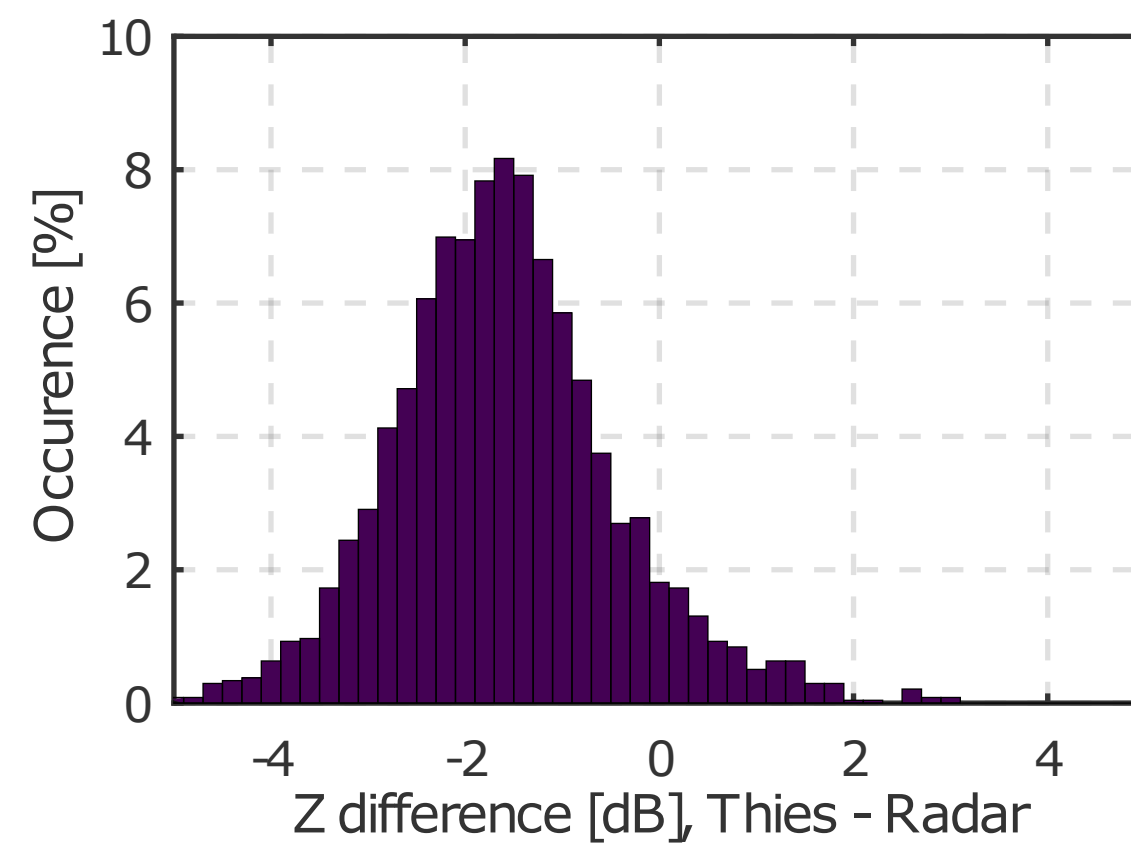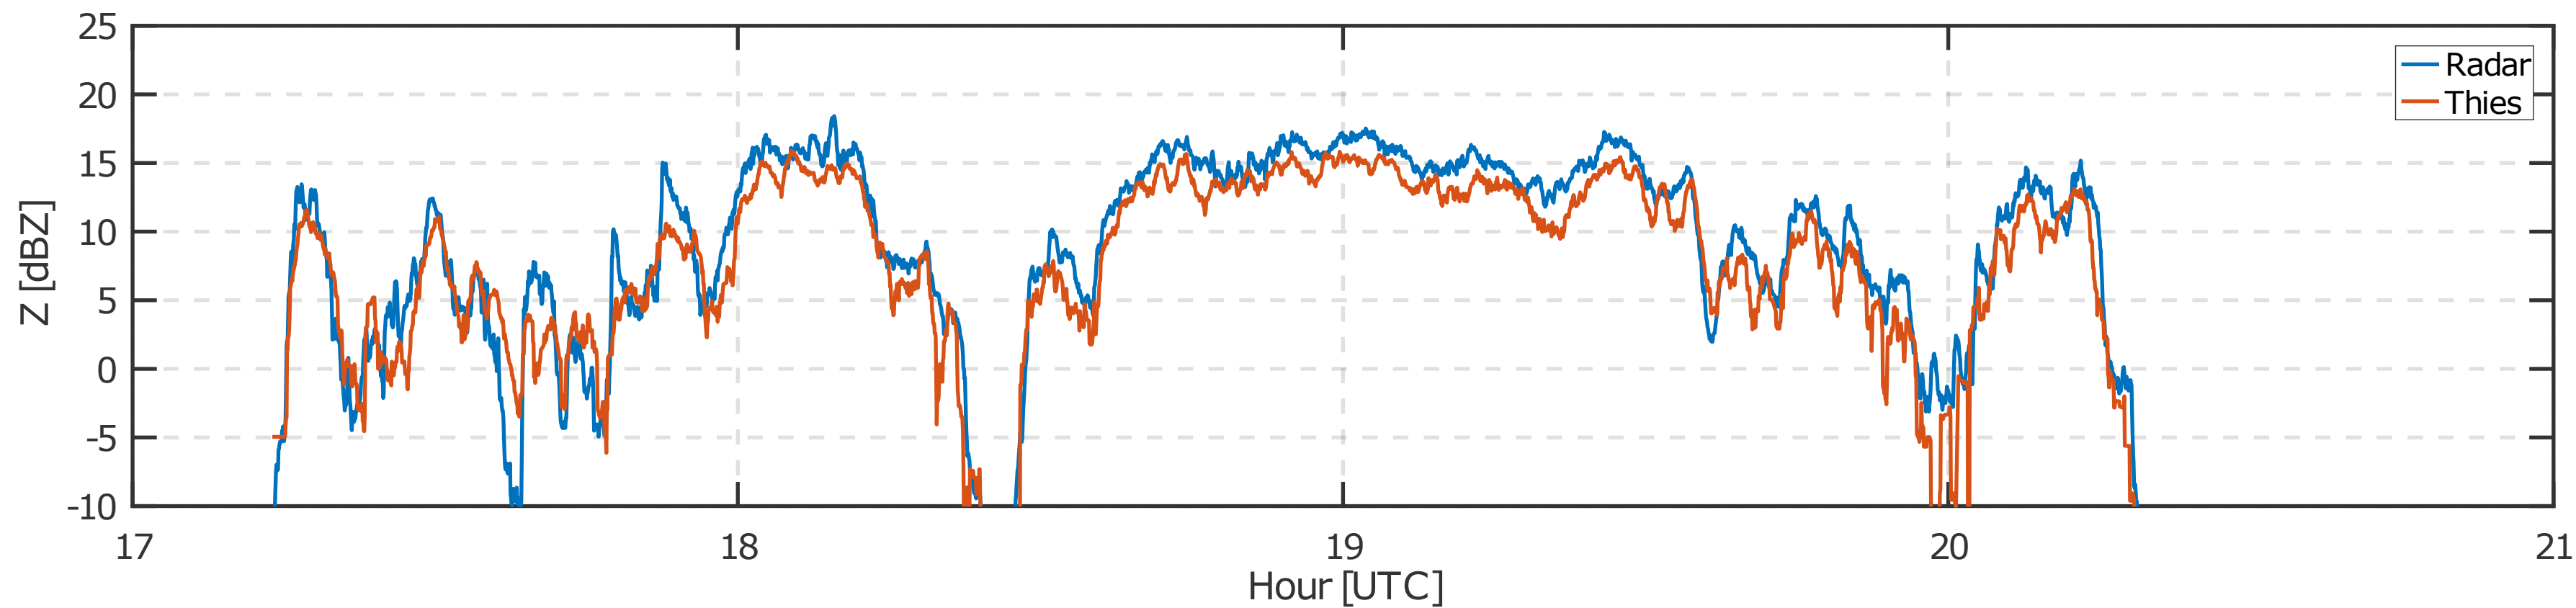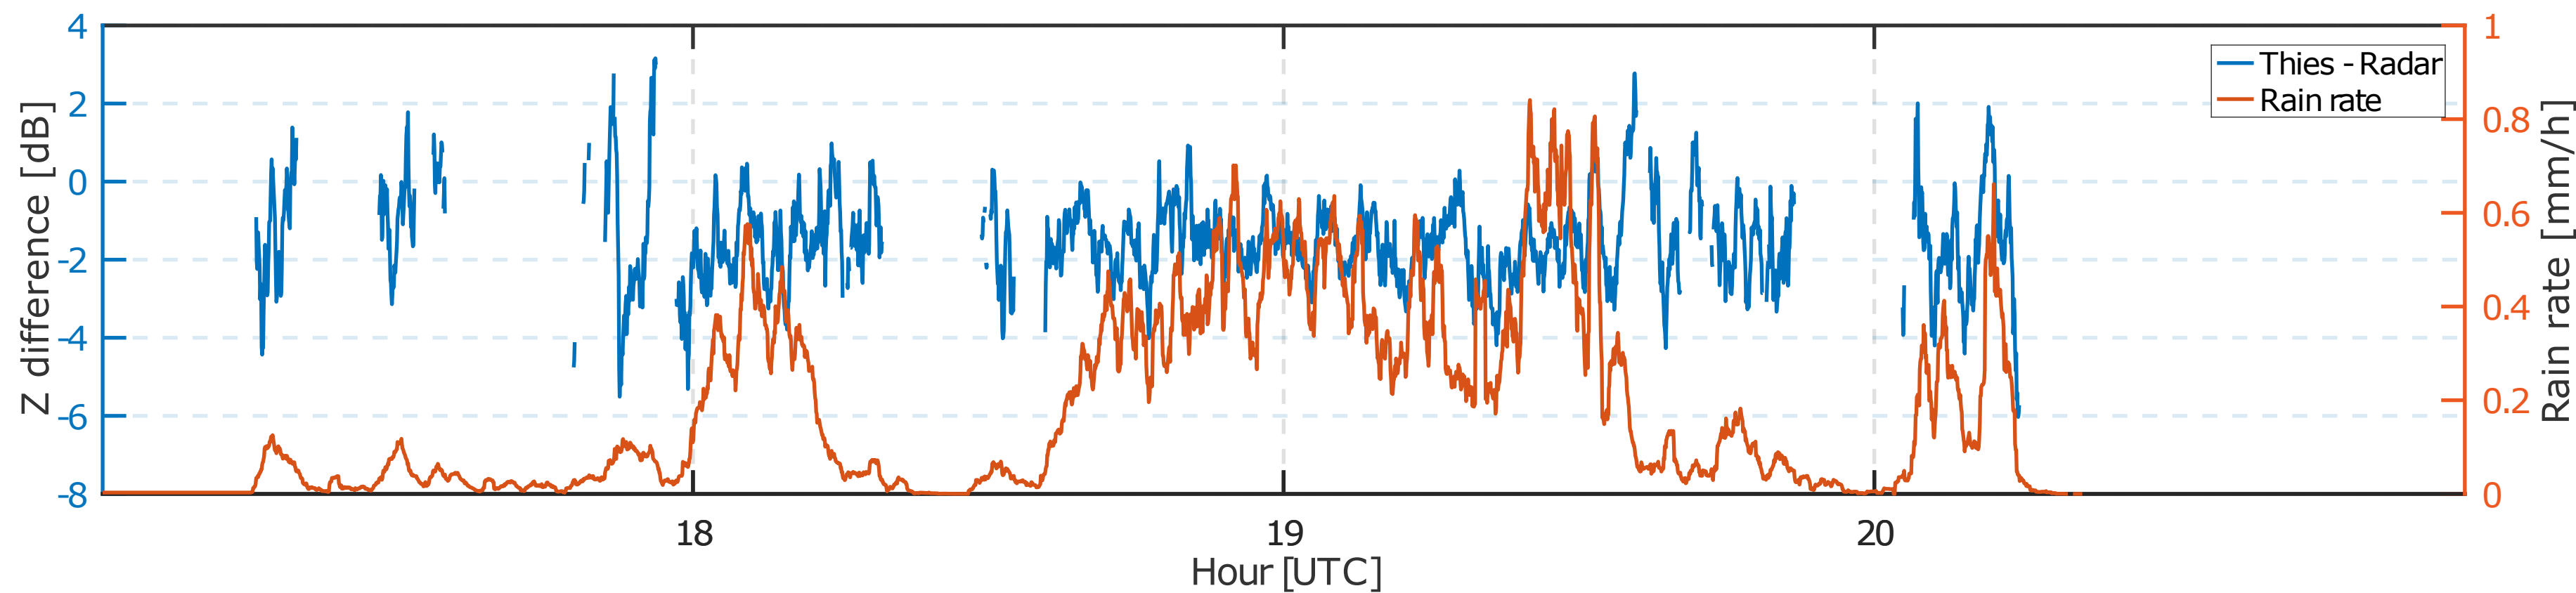

Supplement: Supplementary file 4 [file amt-2020-133-supplement.zip]

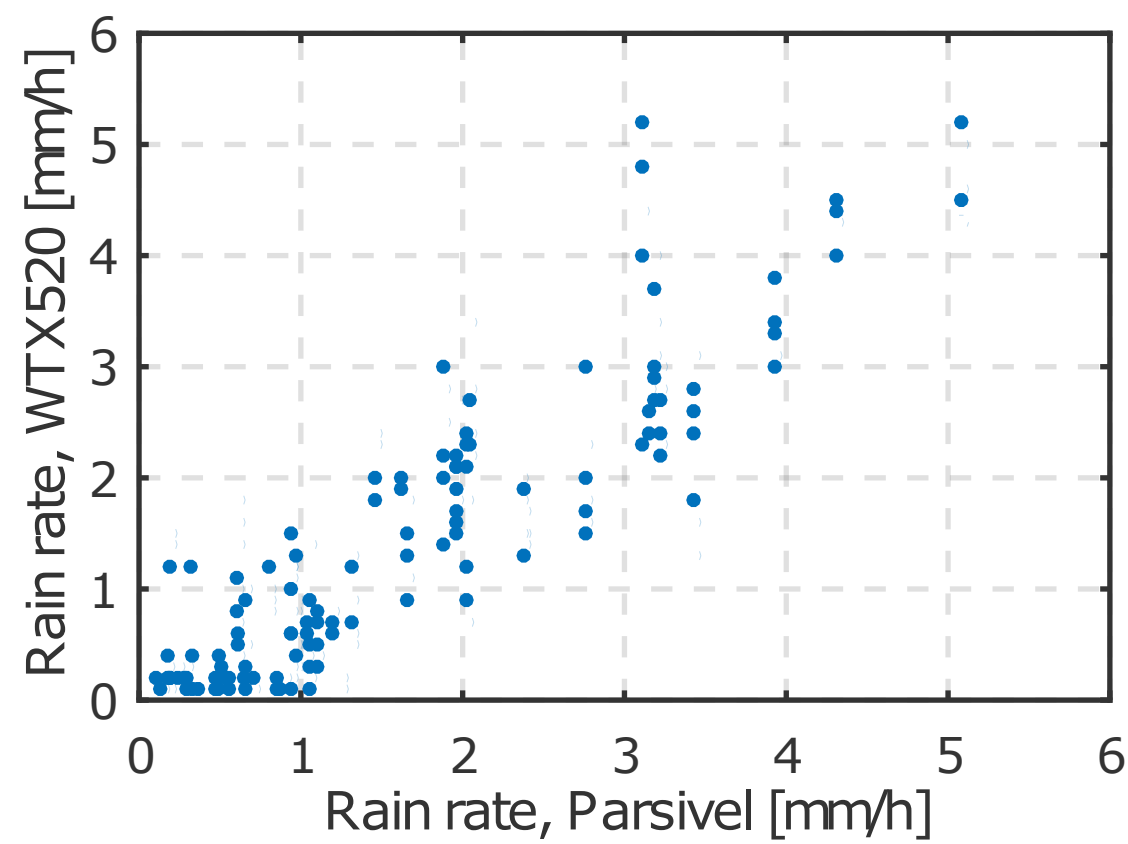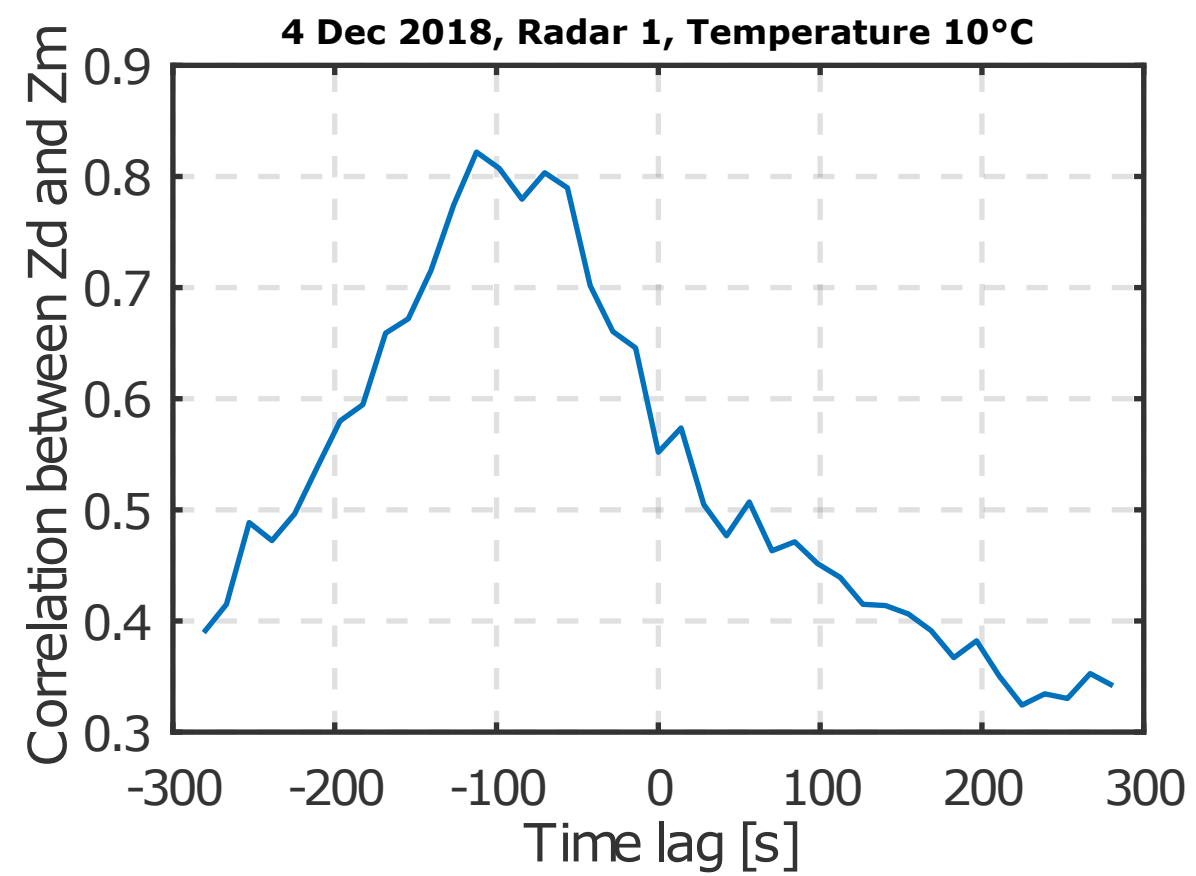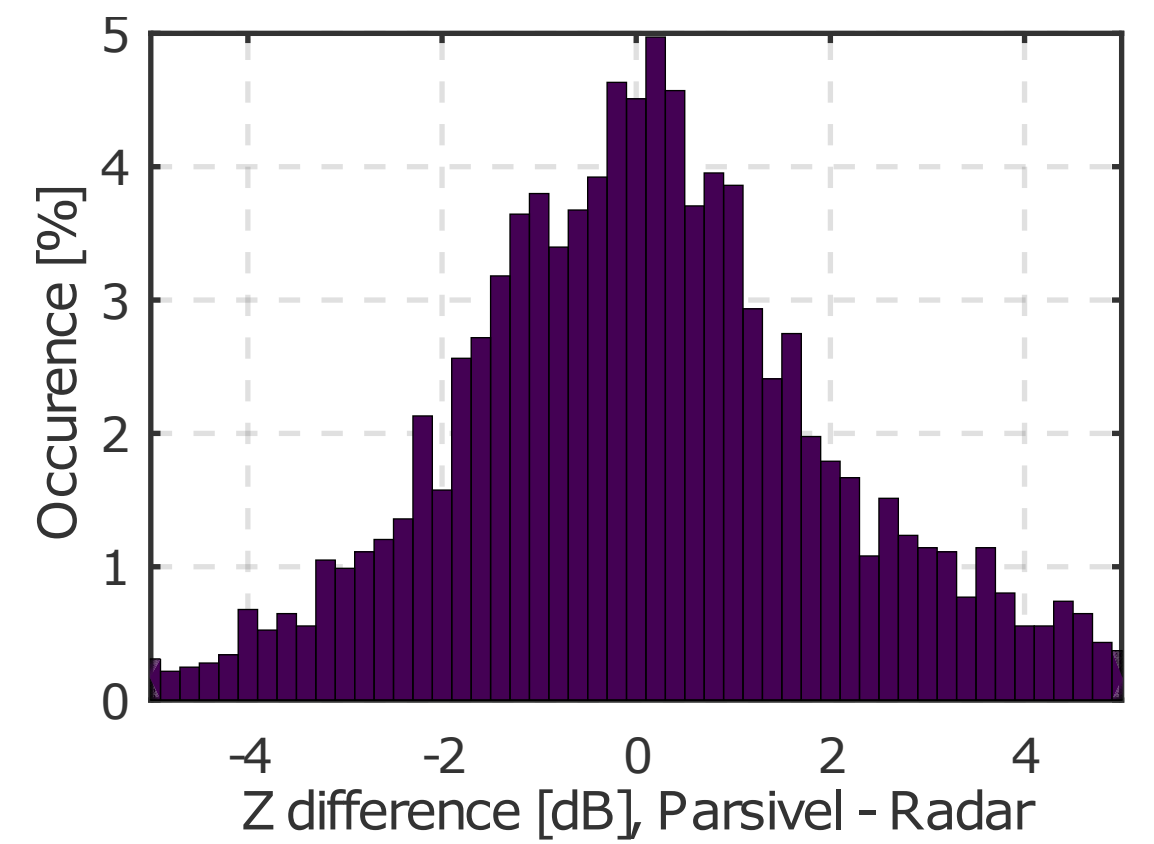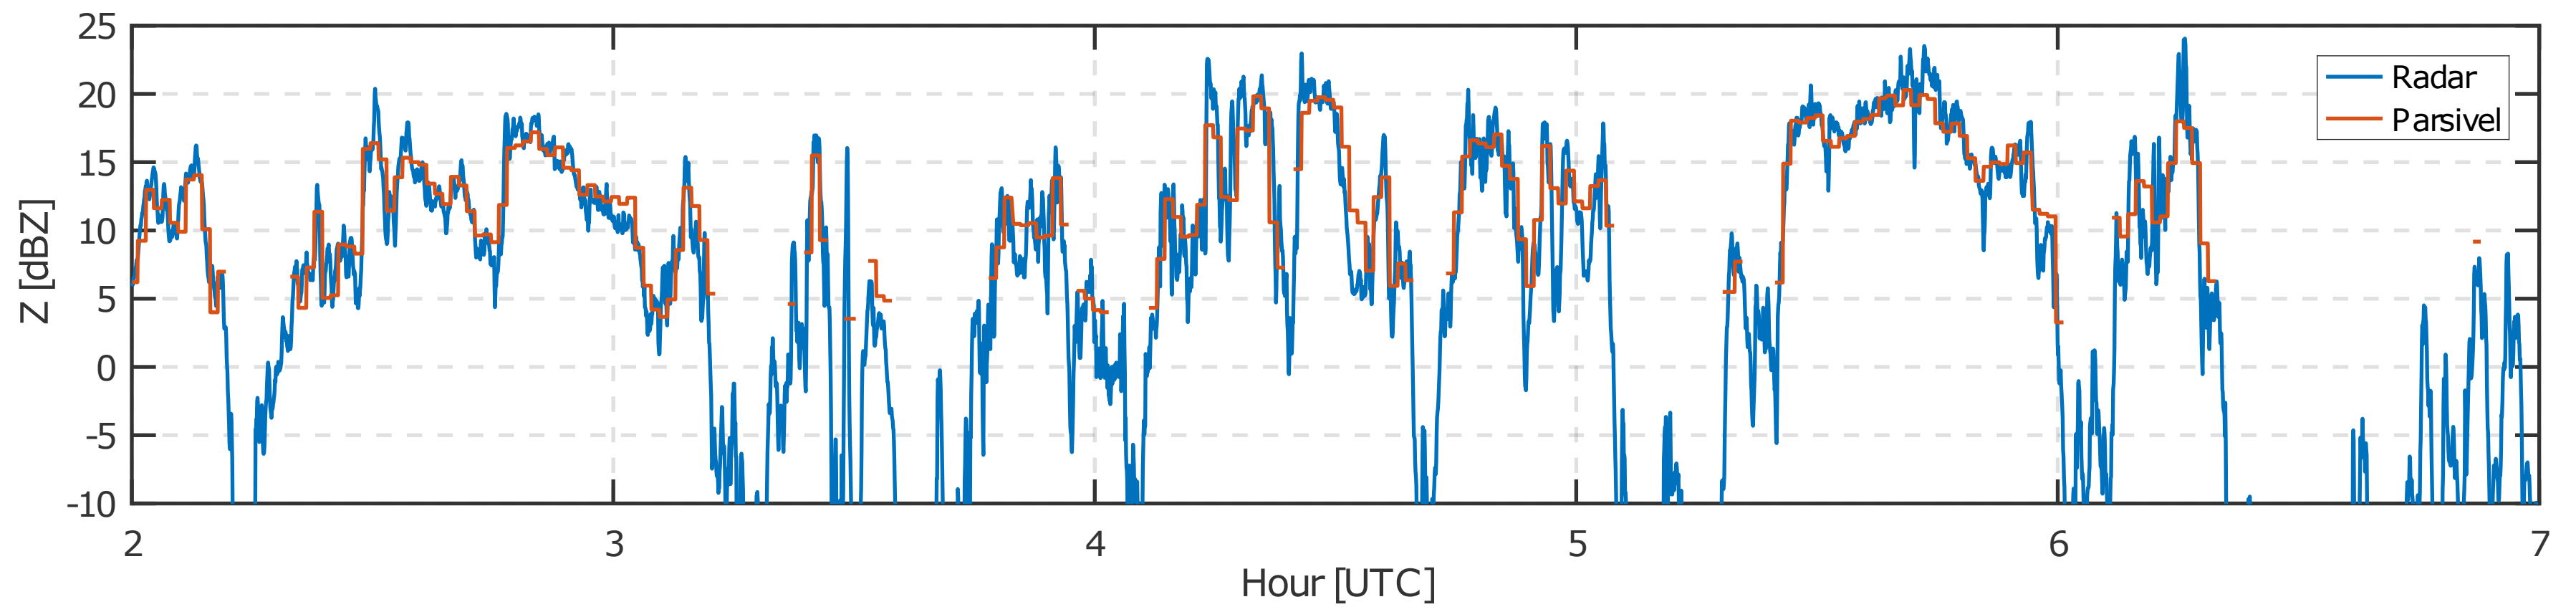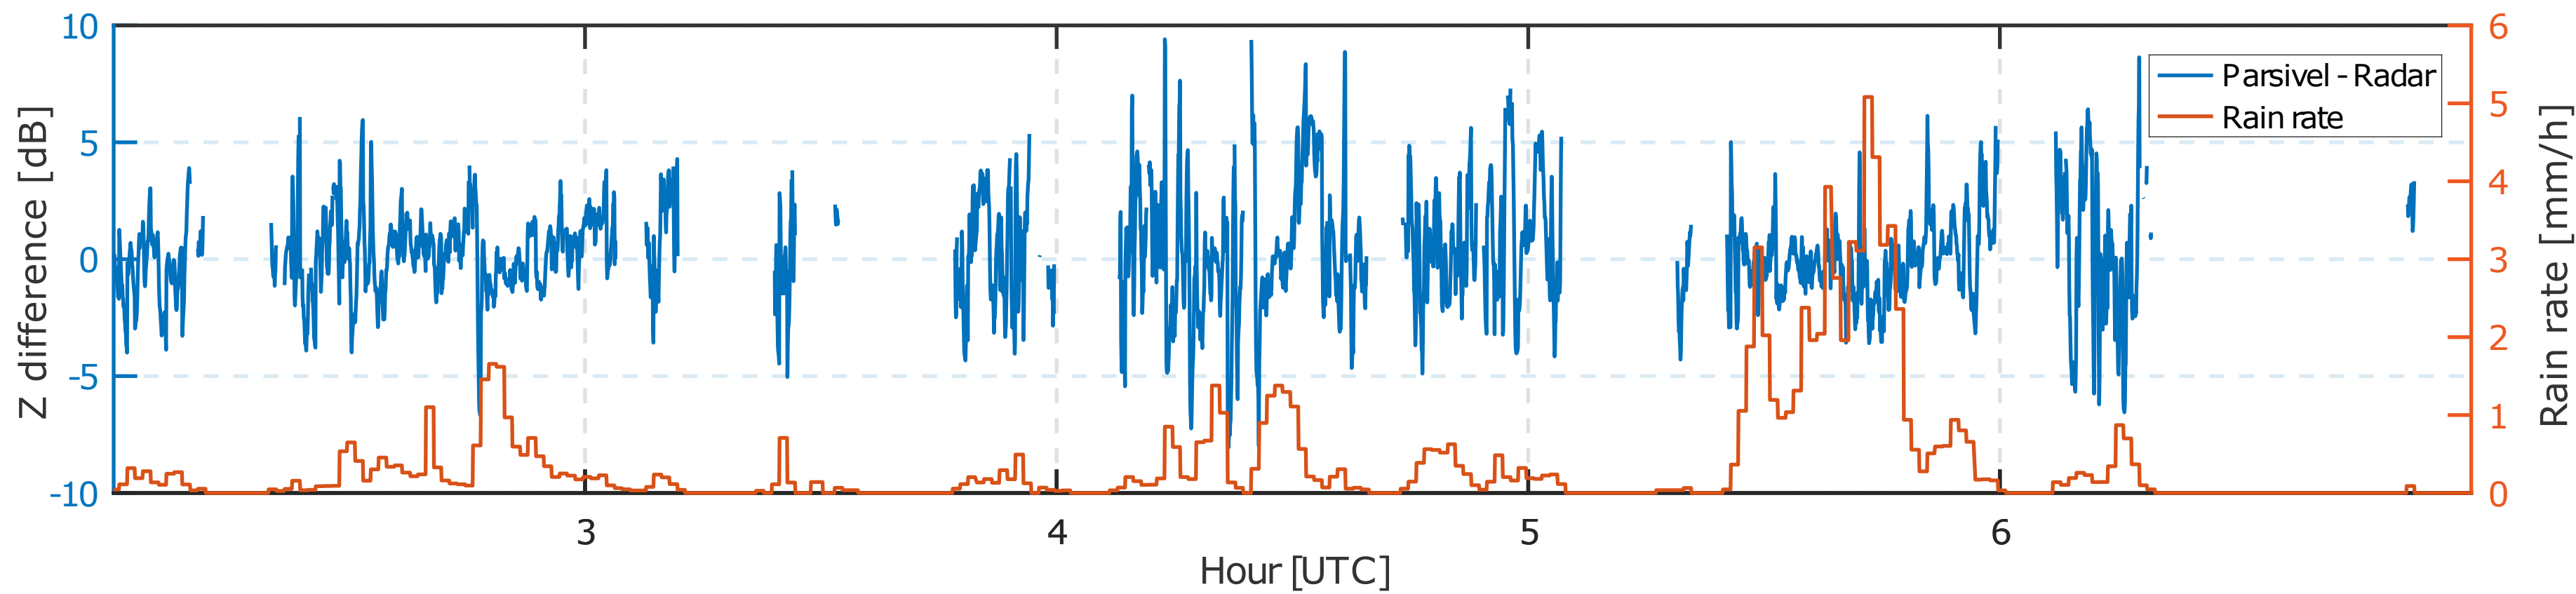

Supplement: Supplementary file 5 [file amt-2020-133-supplement.zip]

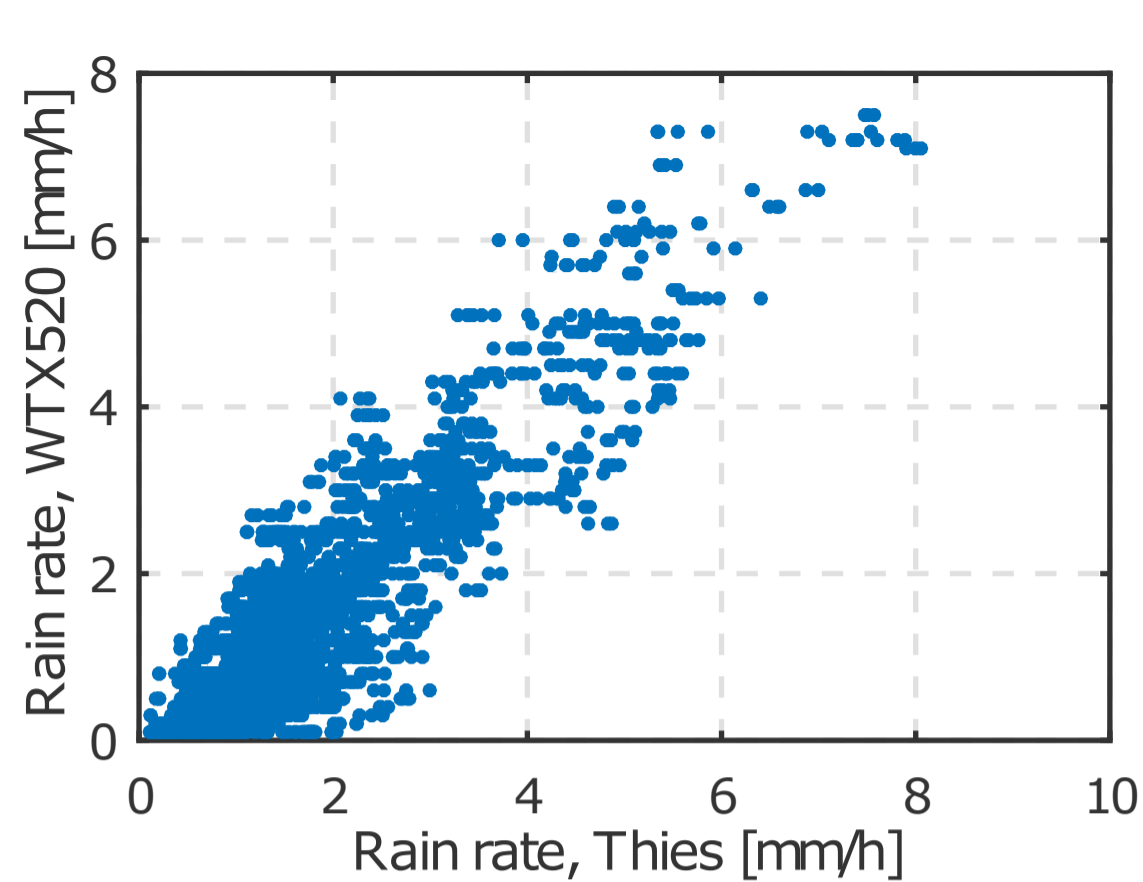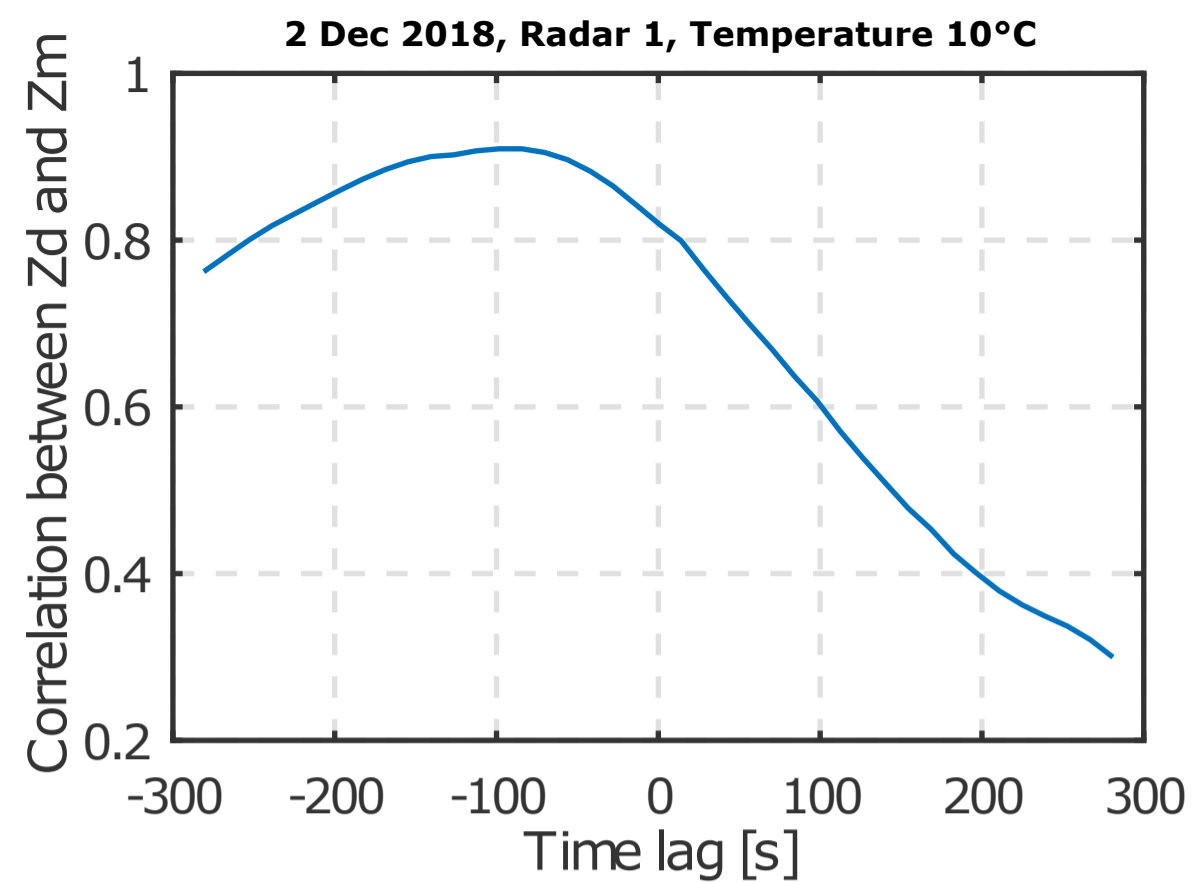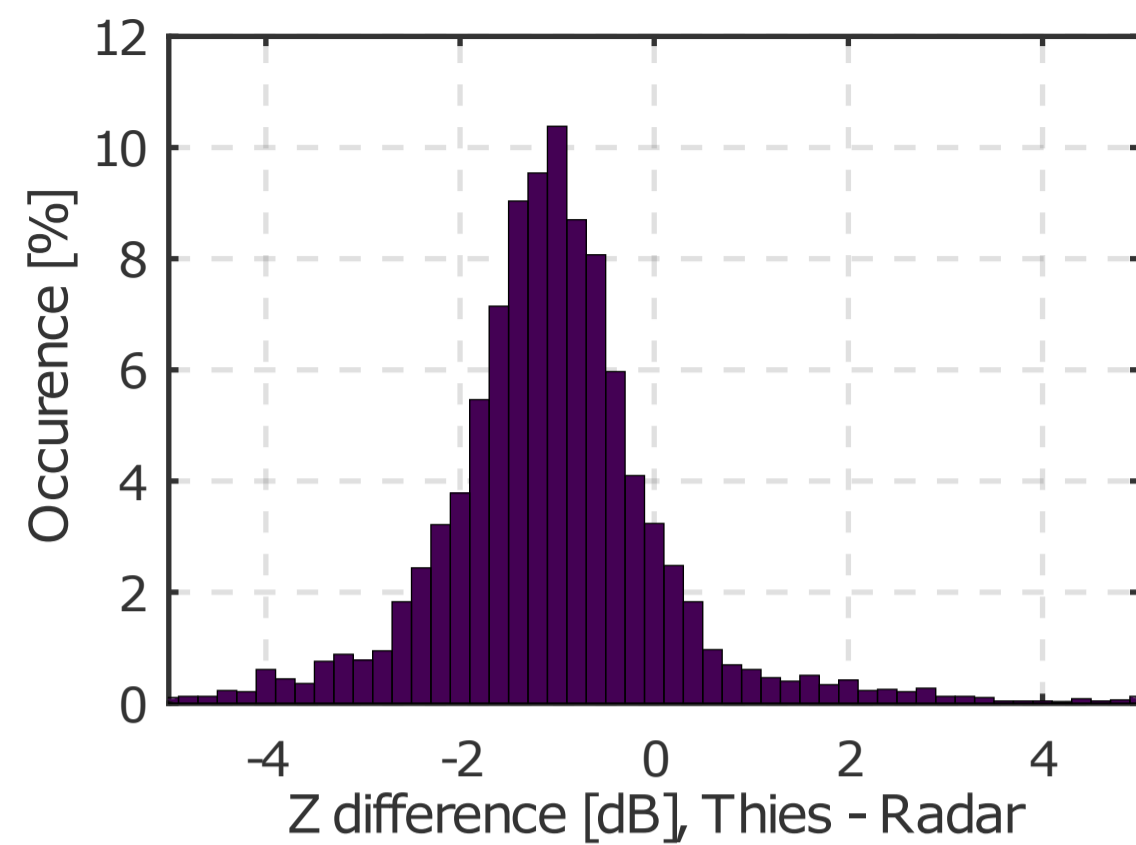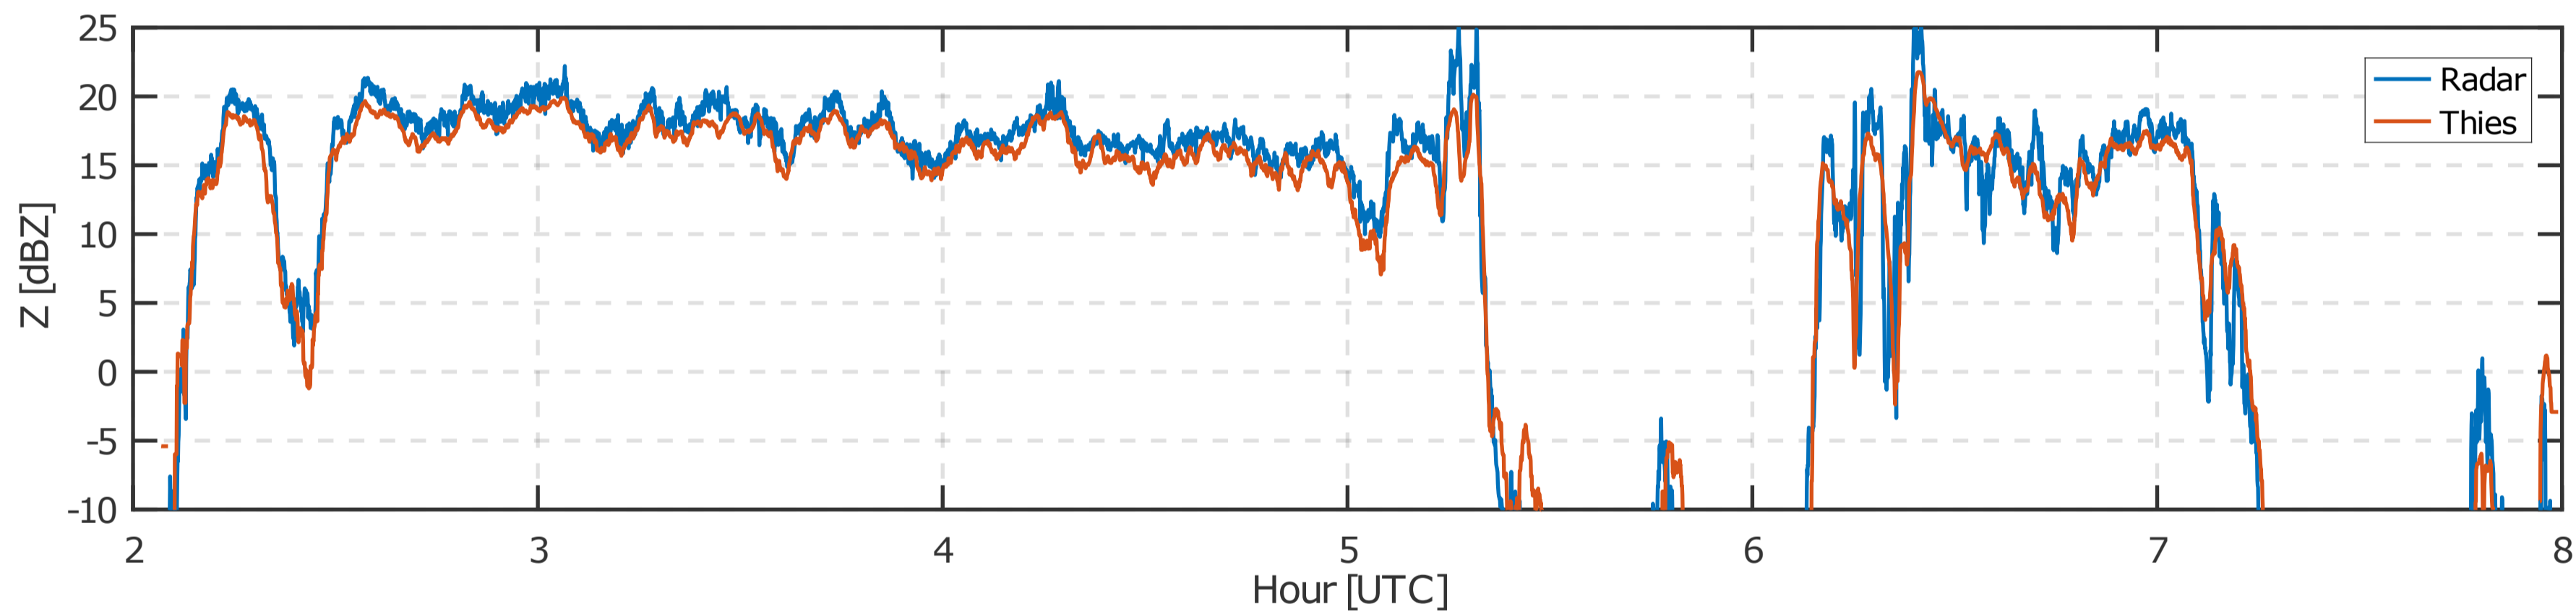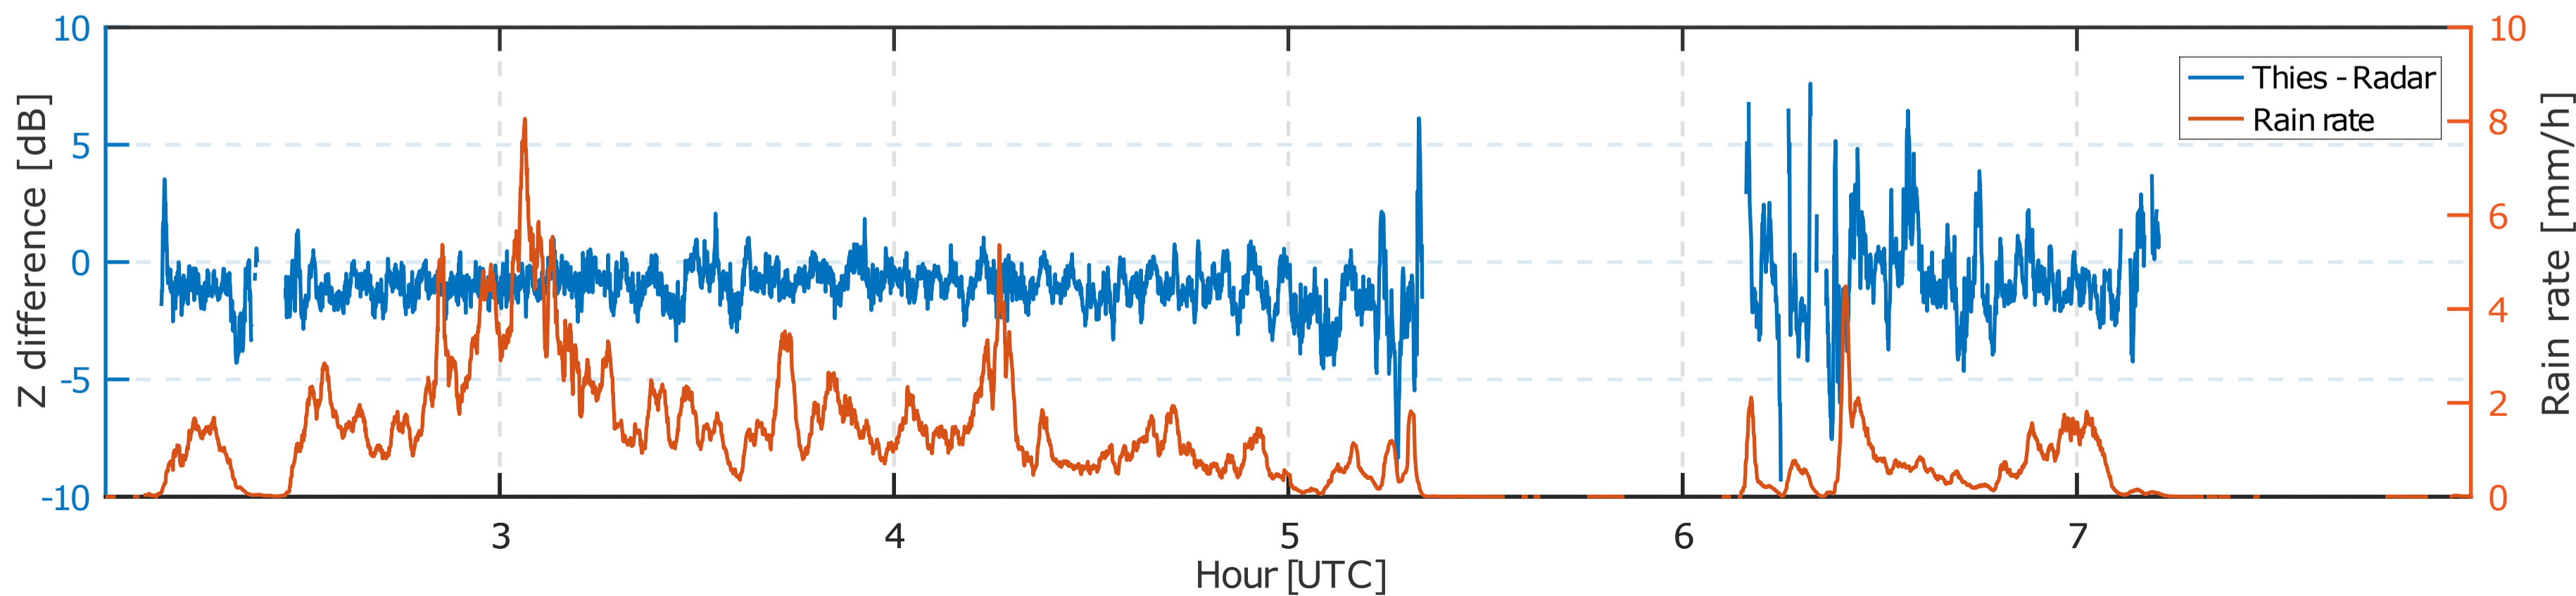

Supplement: Supplementary file 6 [file amt-2020-133-supplement.zip]

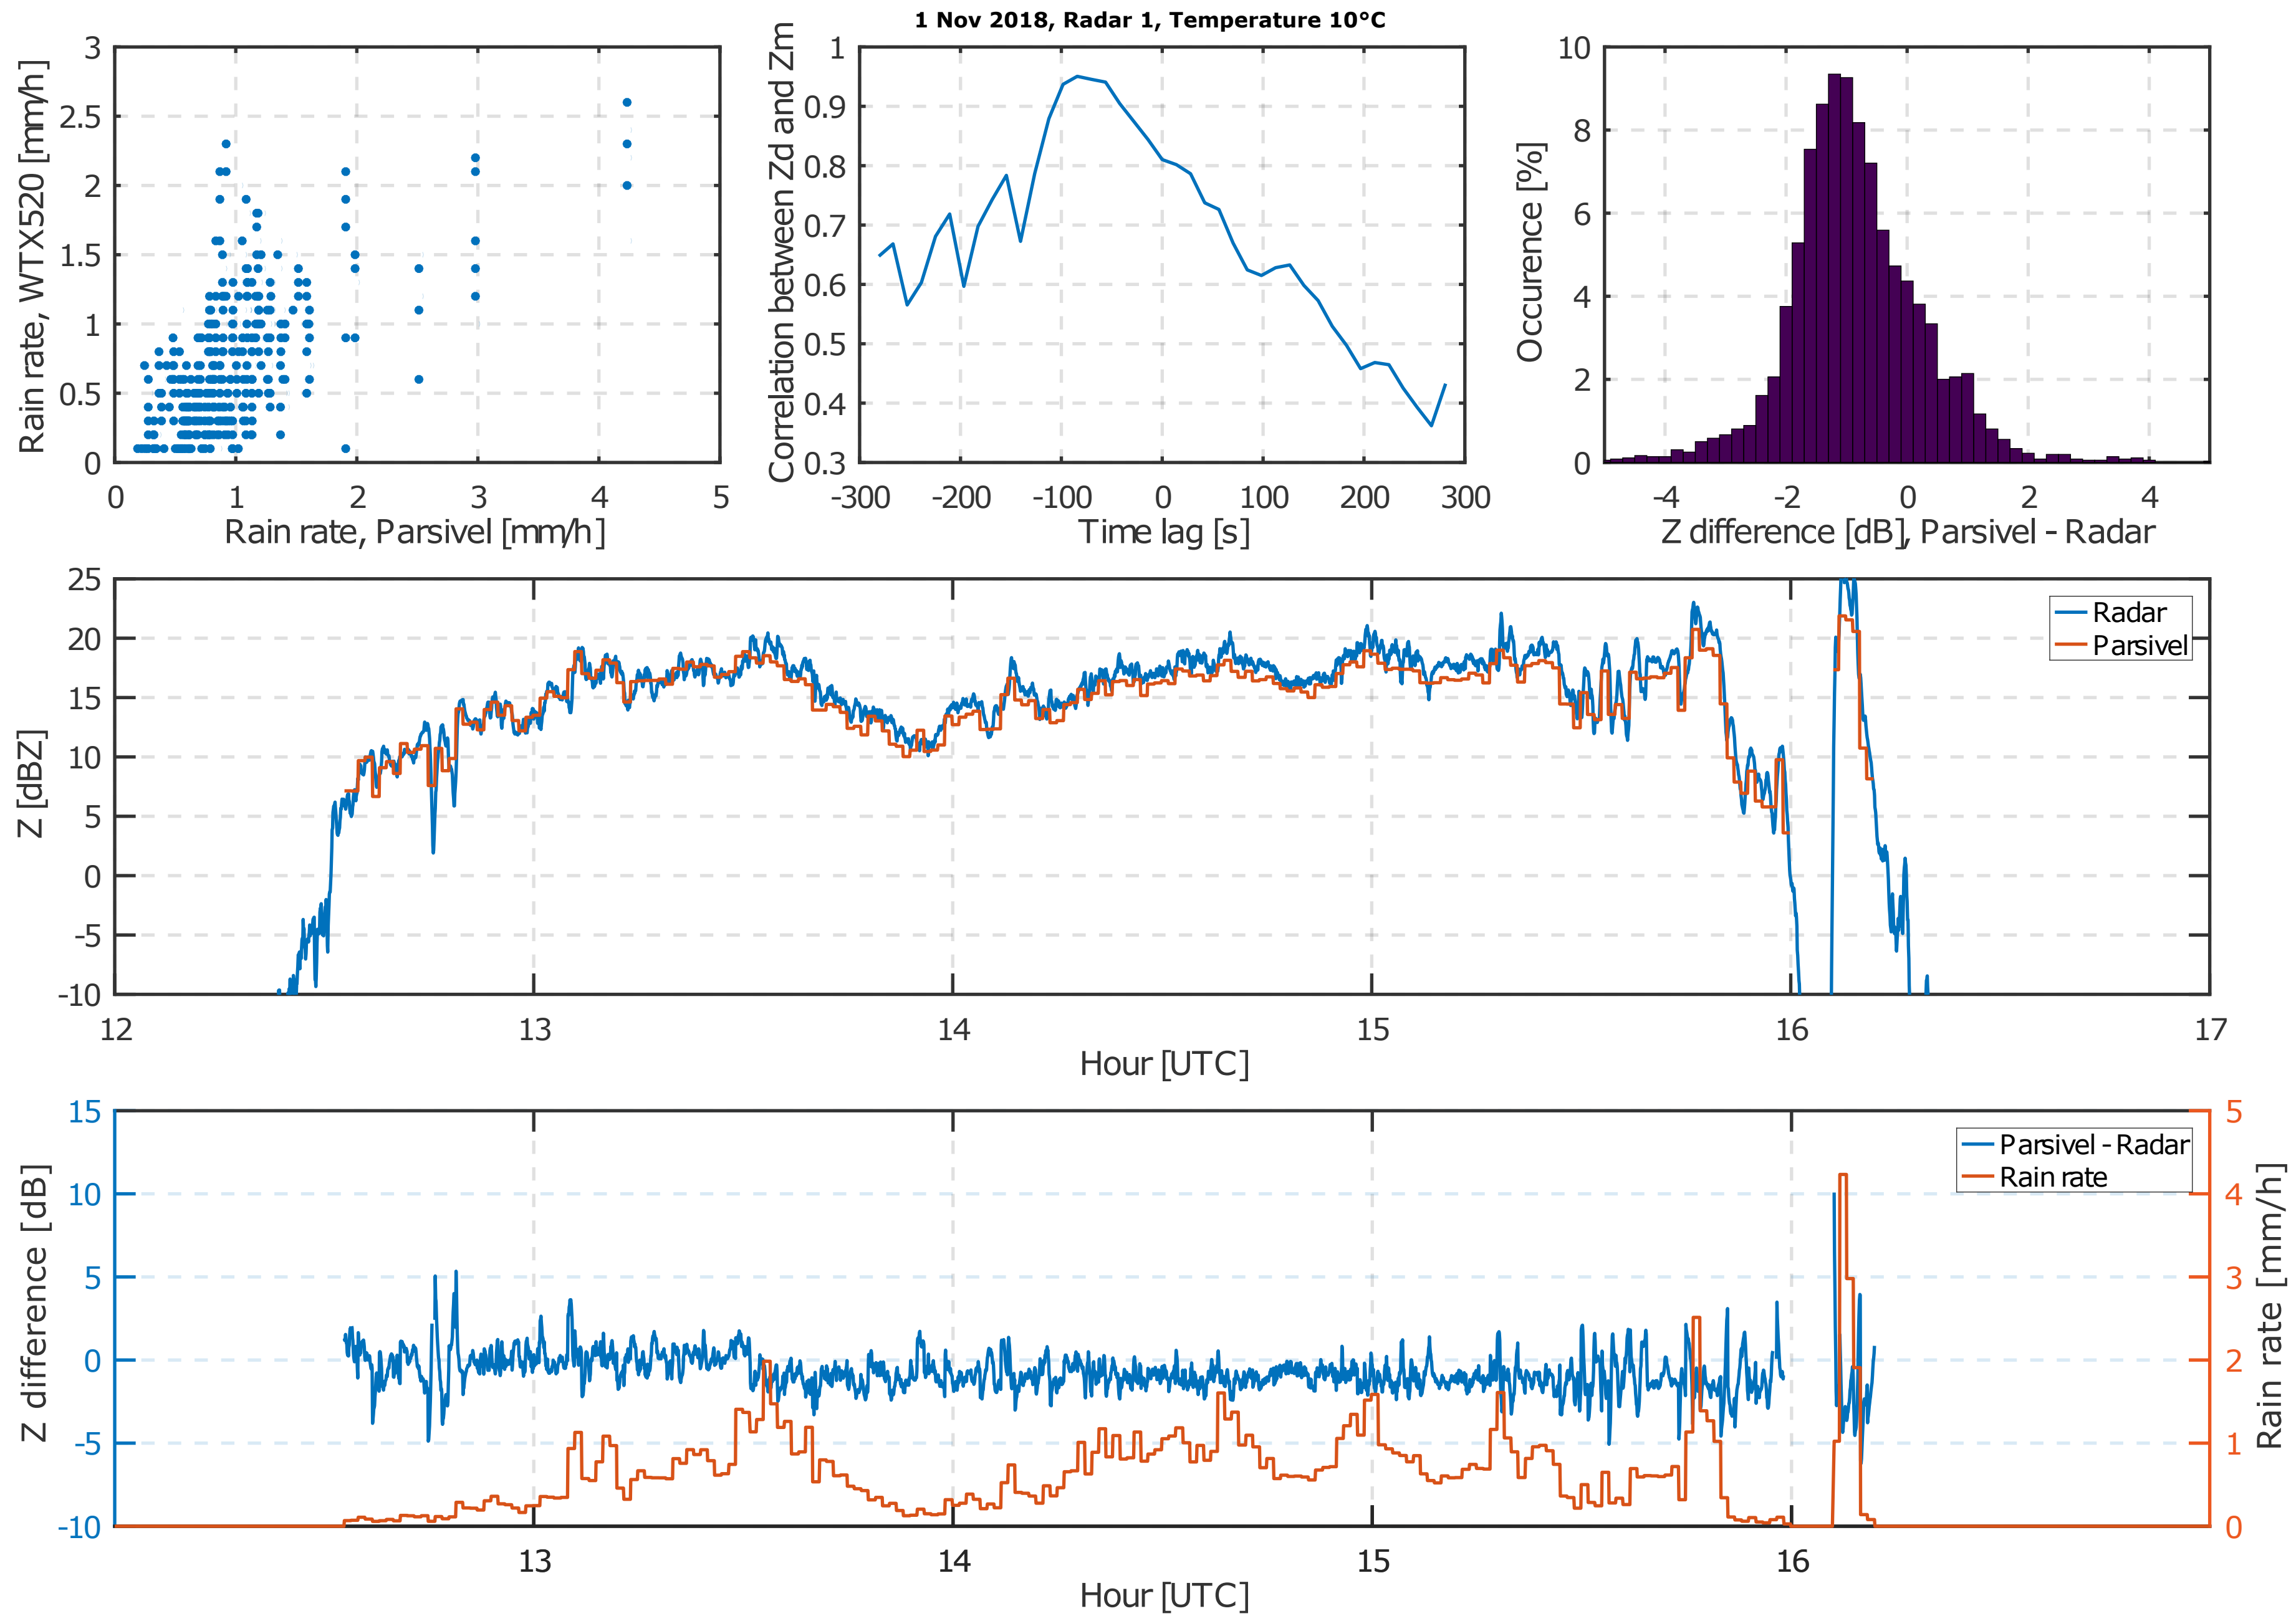

Supplement: Supplementary file 7 [file amt-2020-133-supplement.zip]

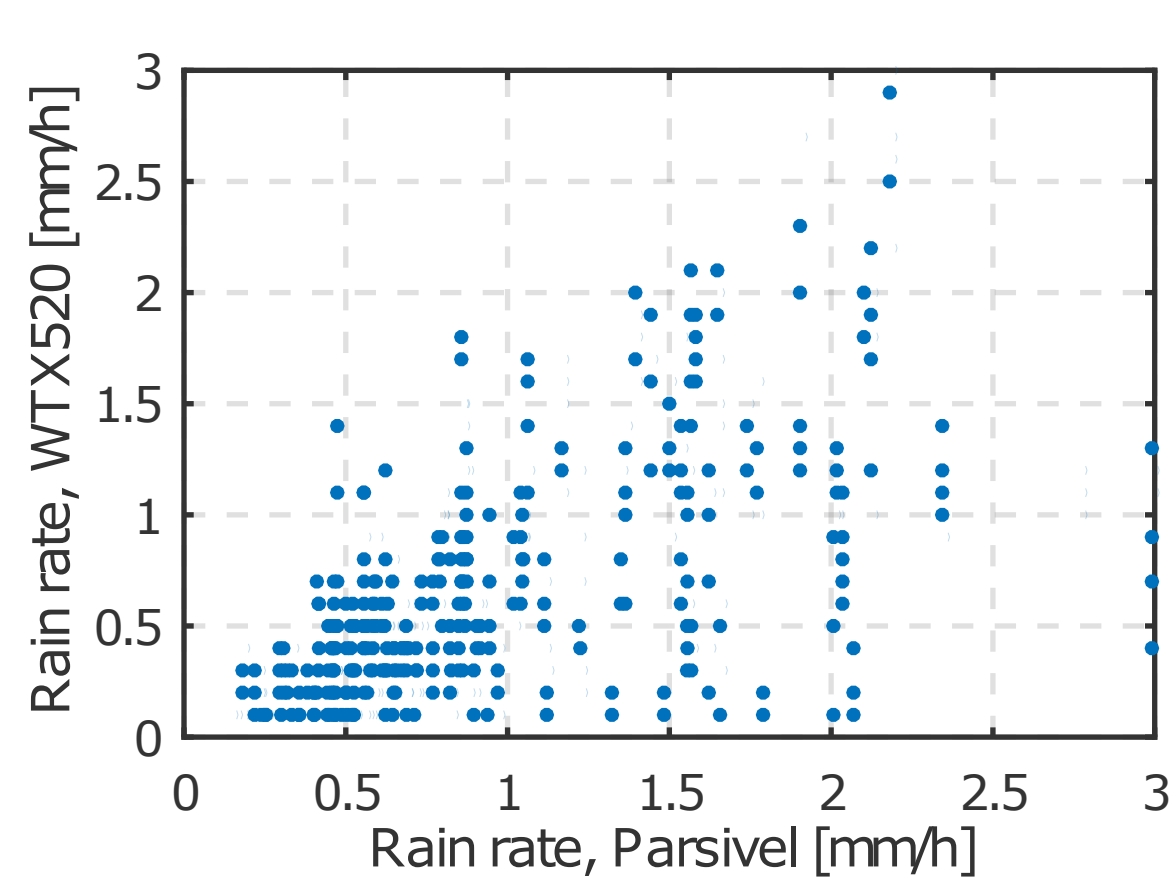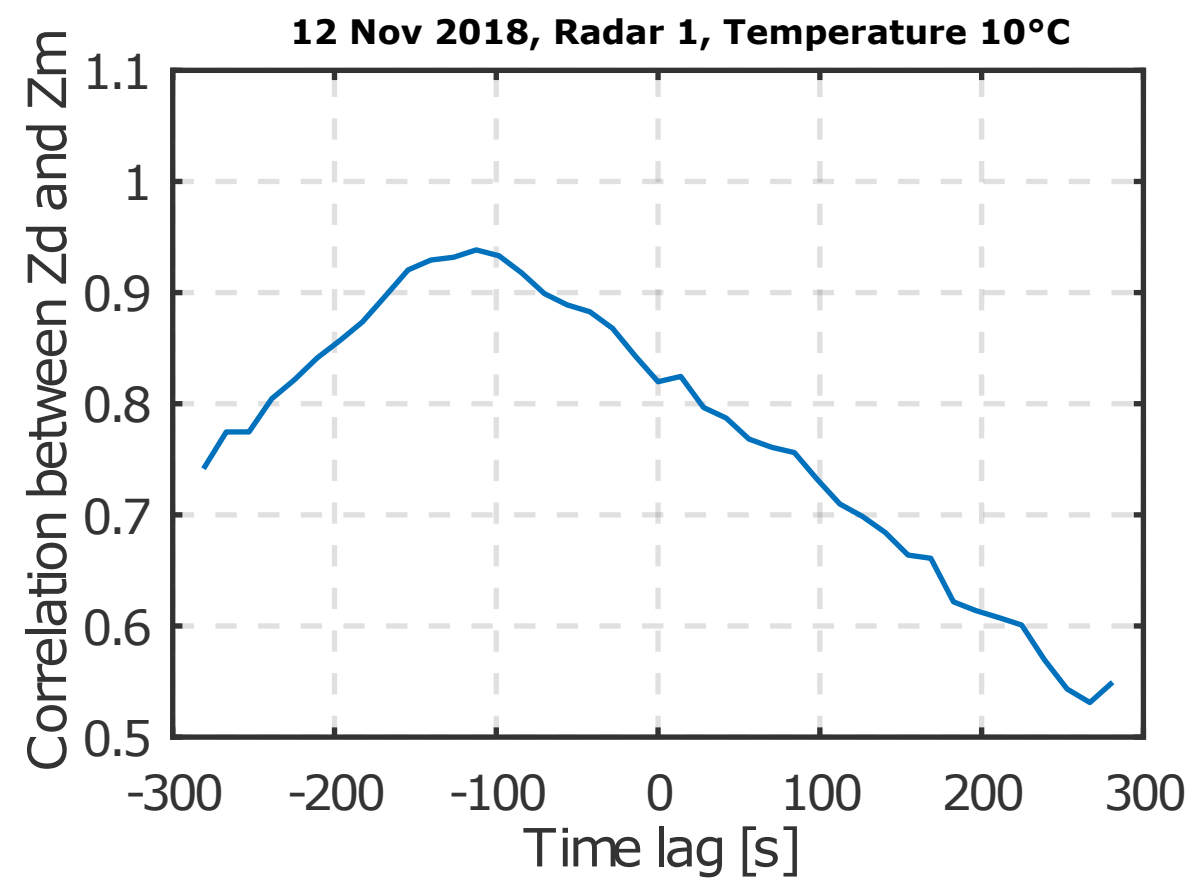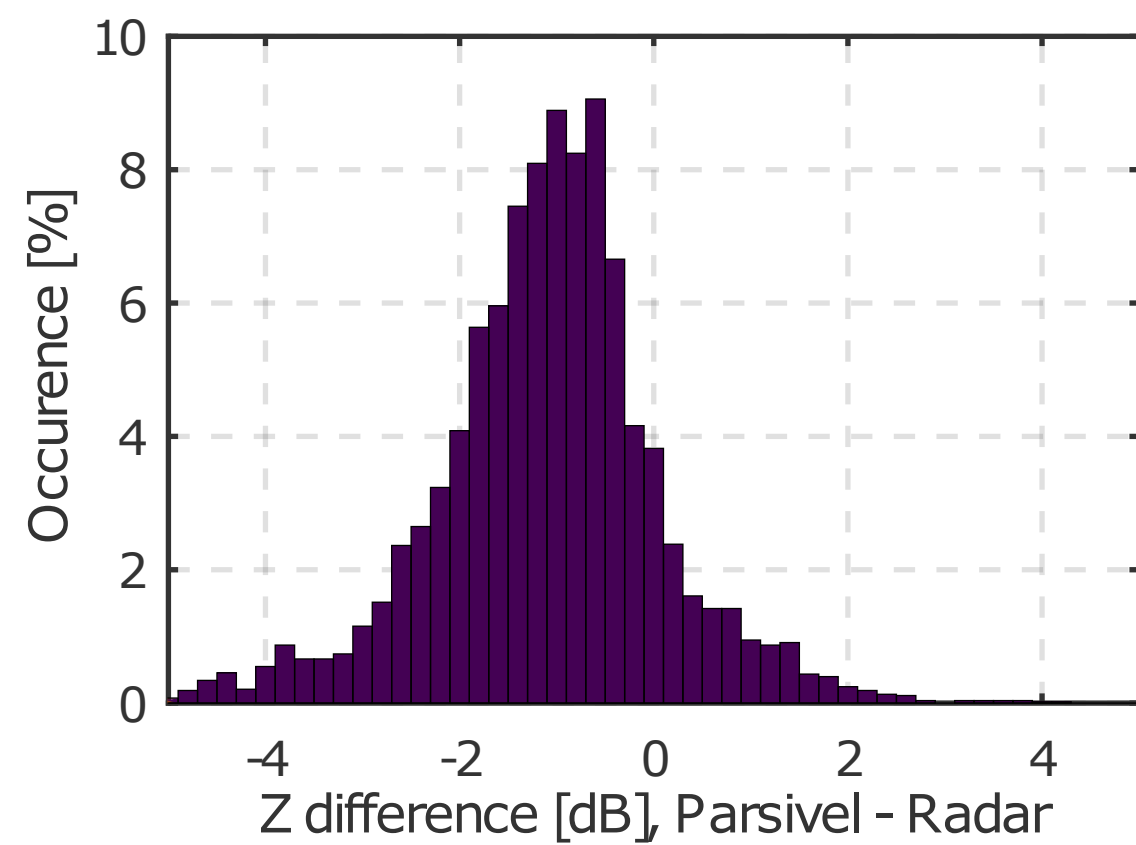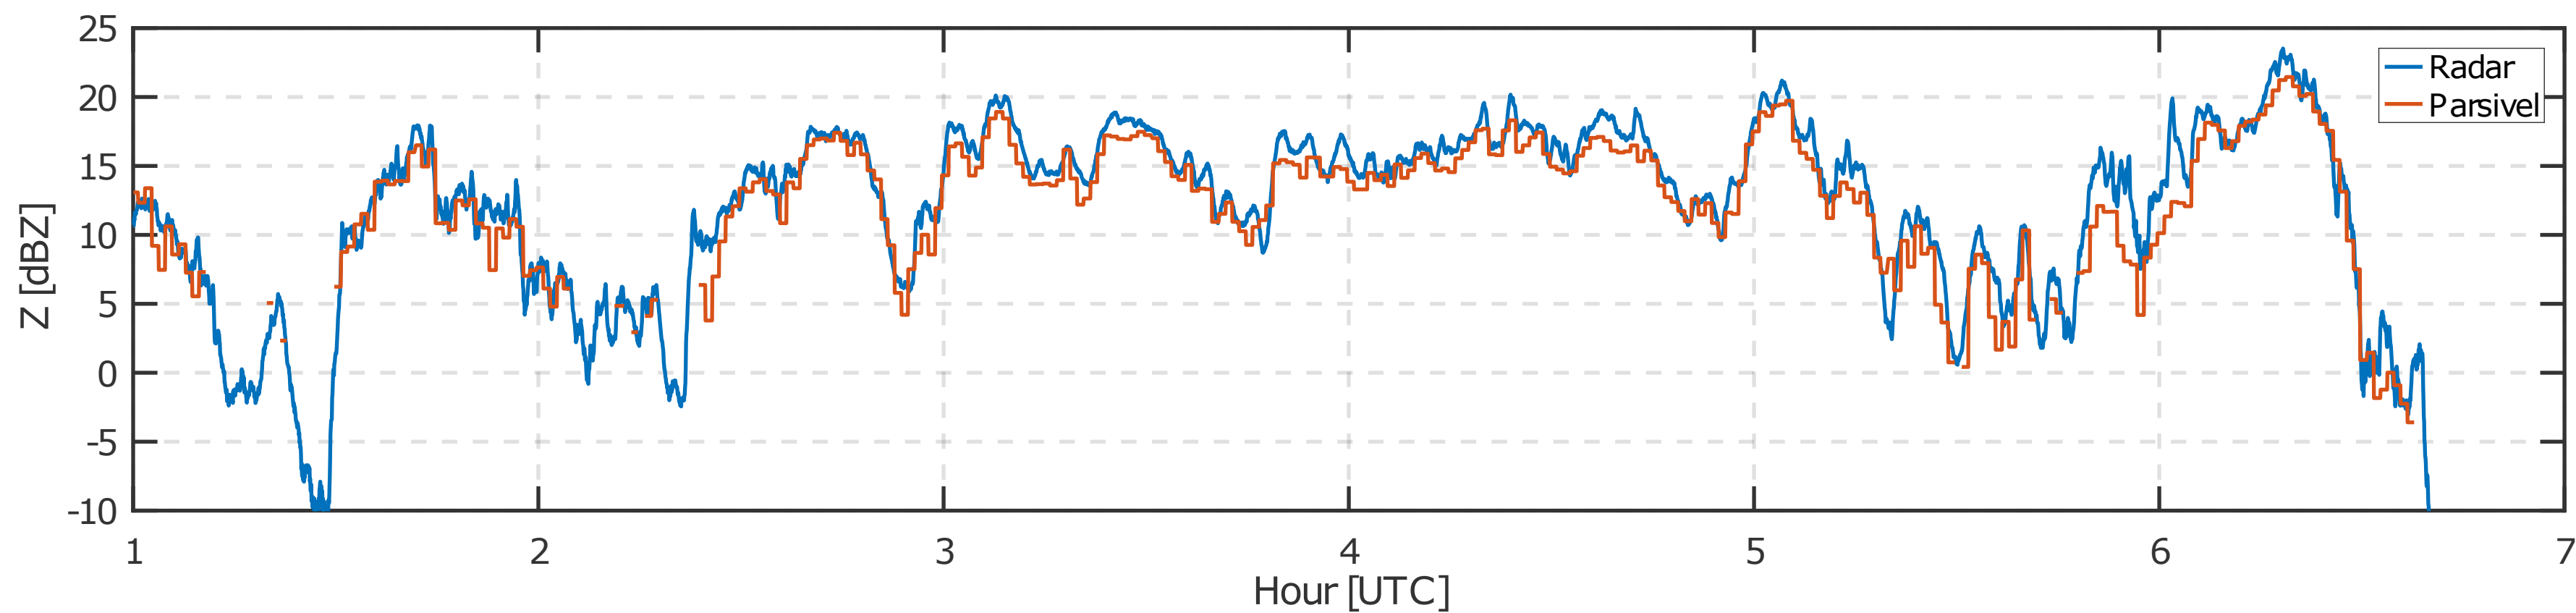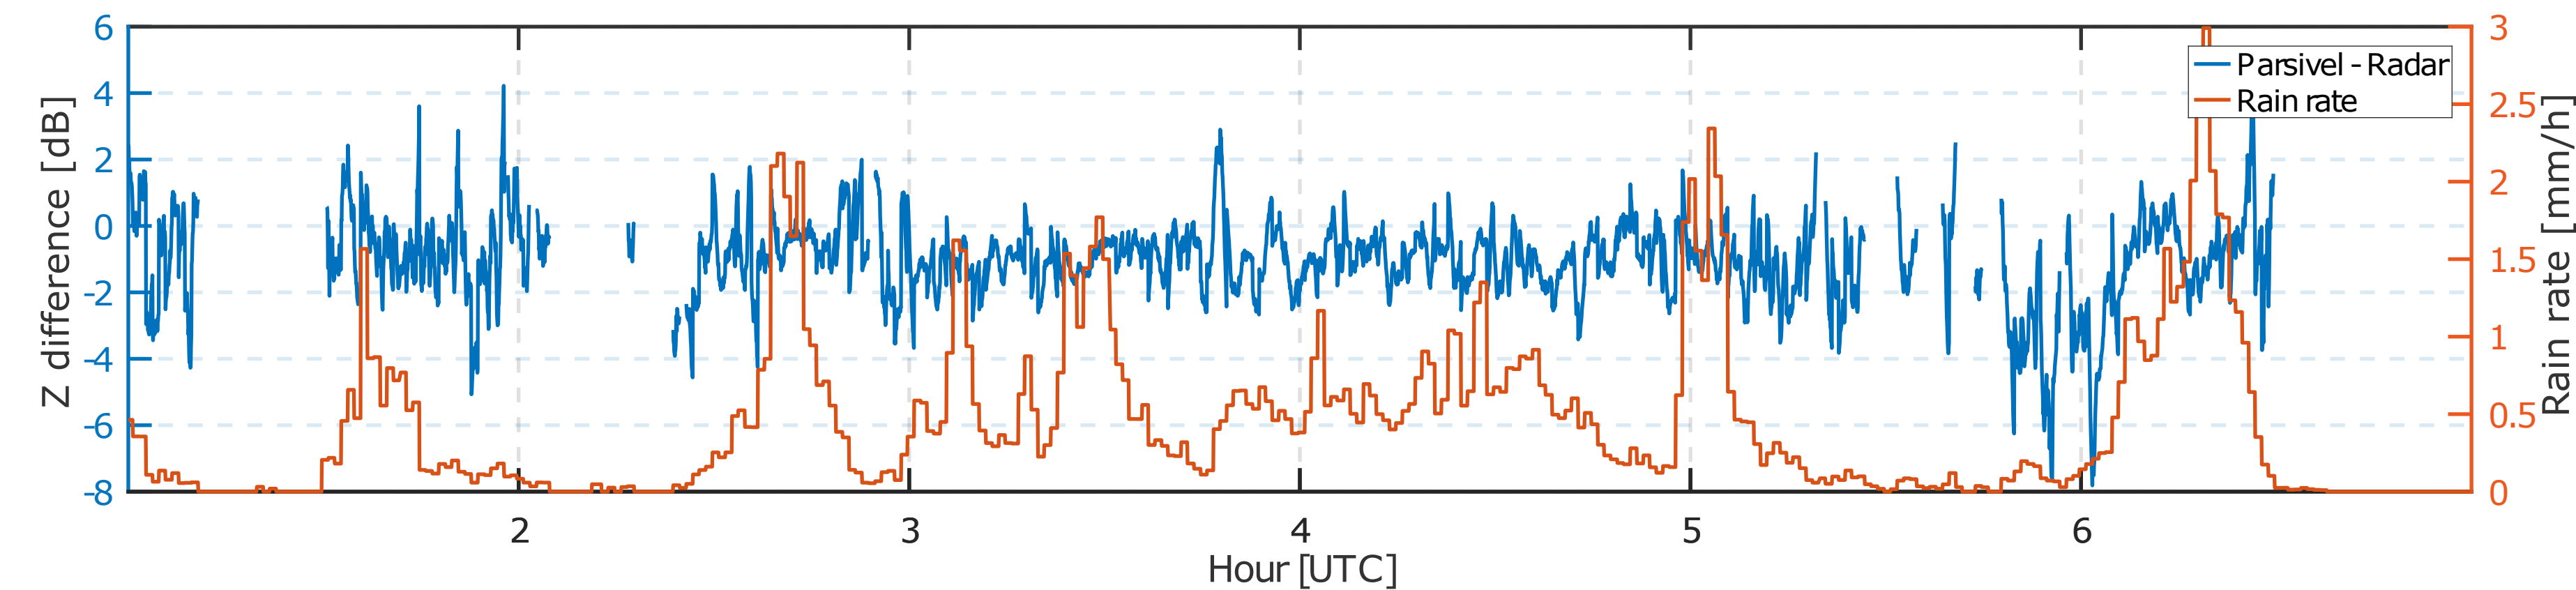

Supplement: Supplementary file 8 [file amt-2020-133-supplement.zip]

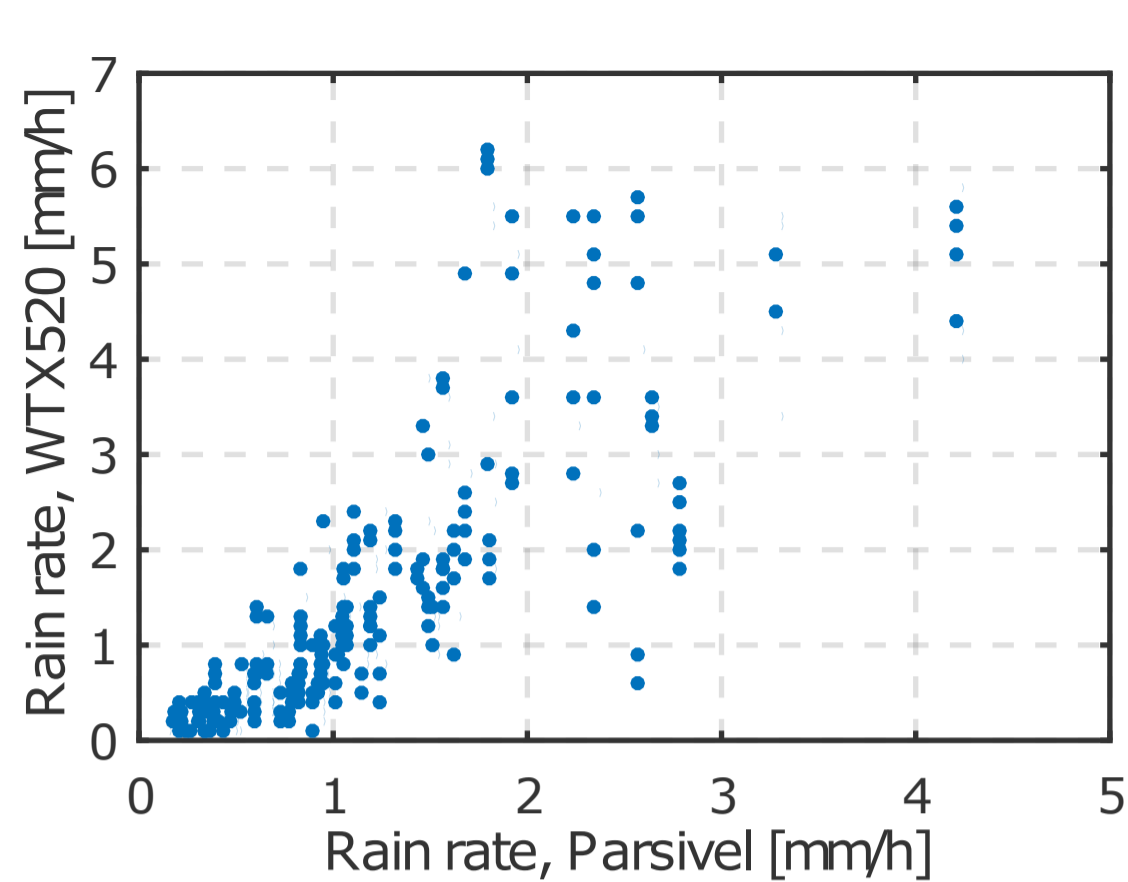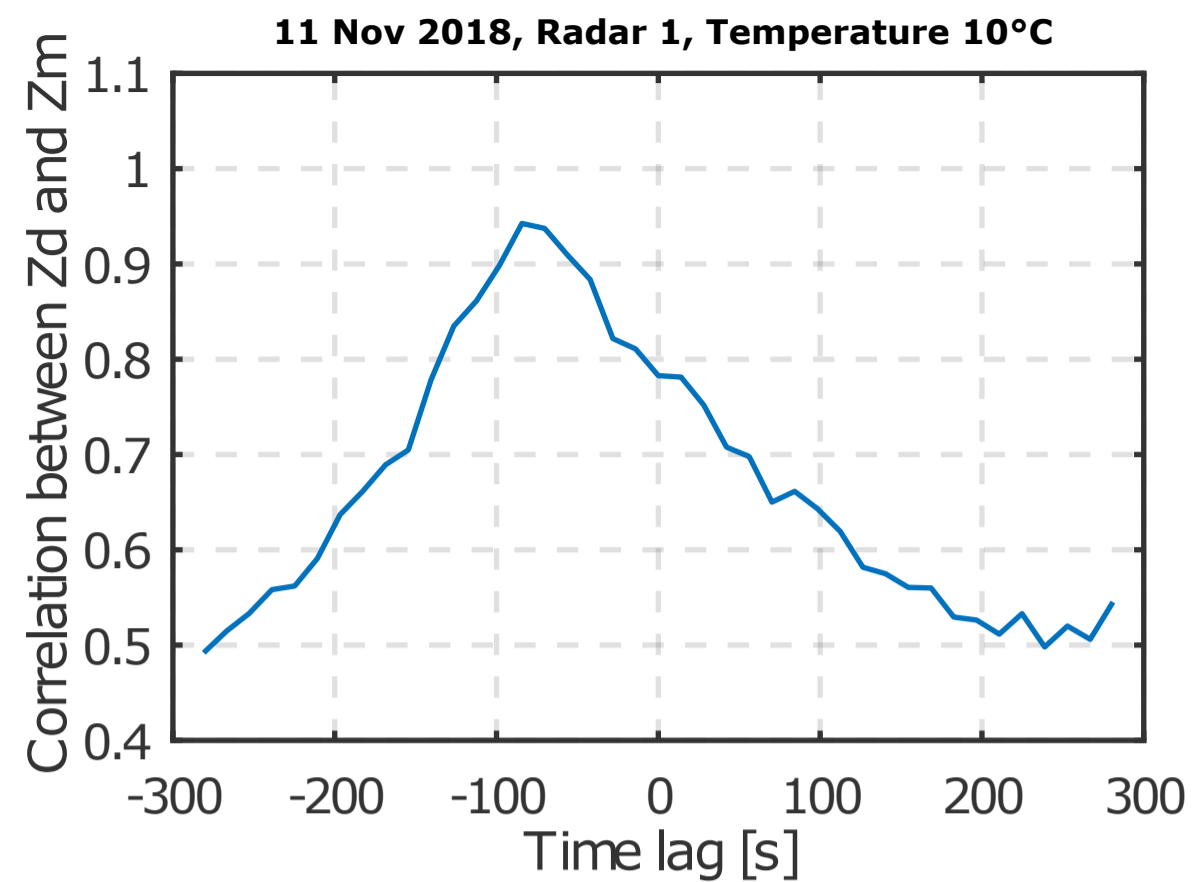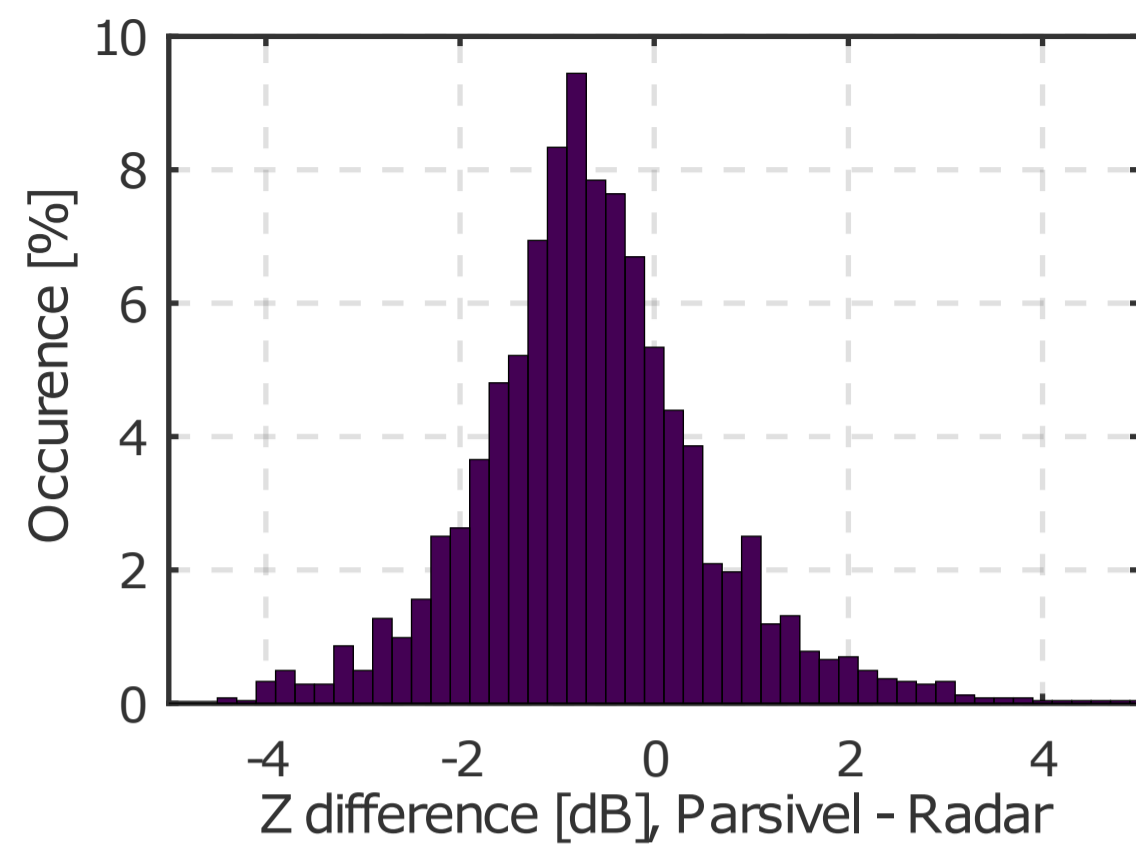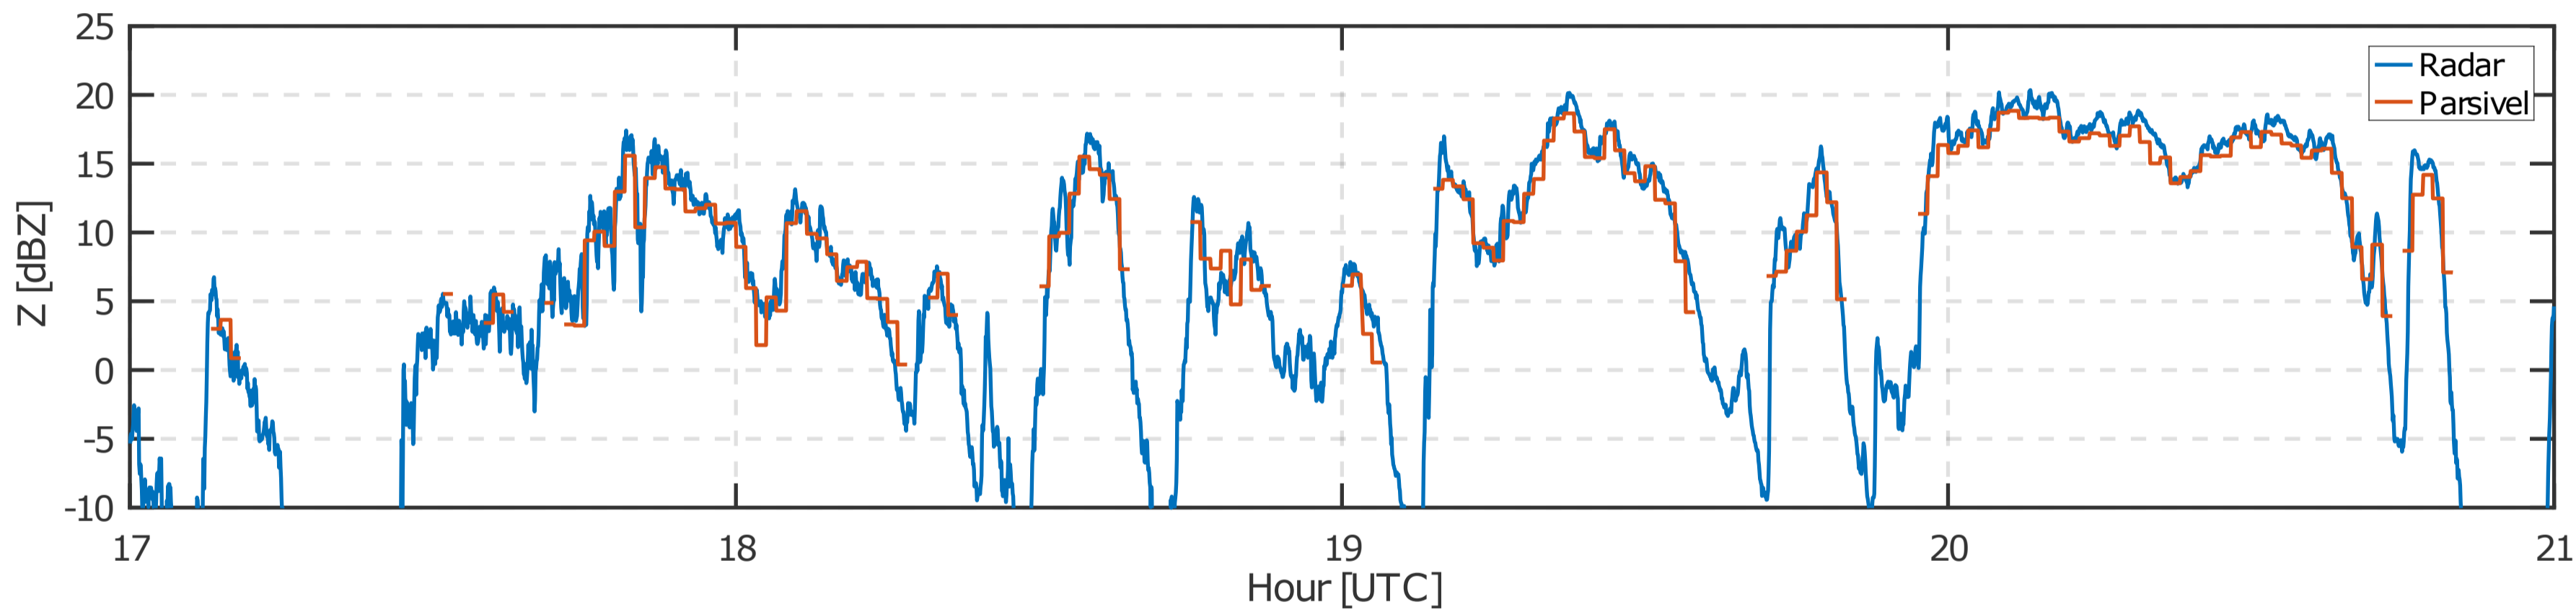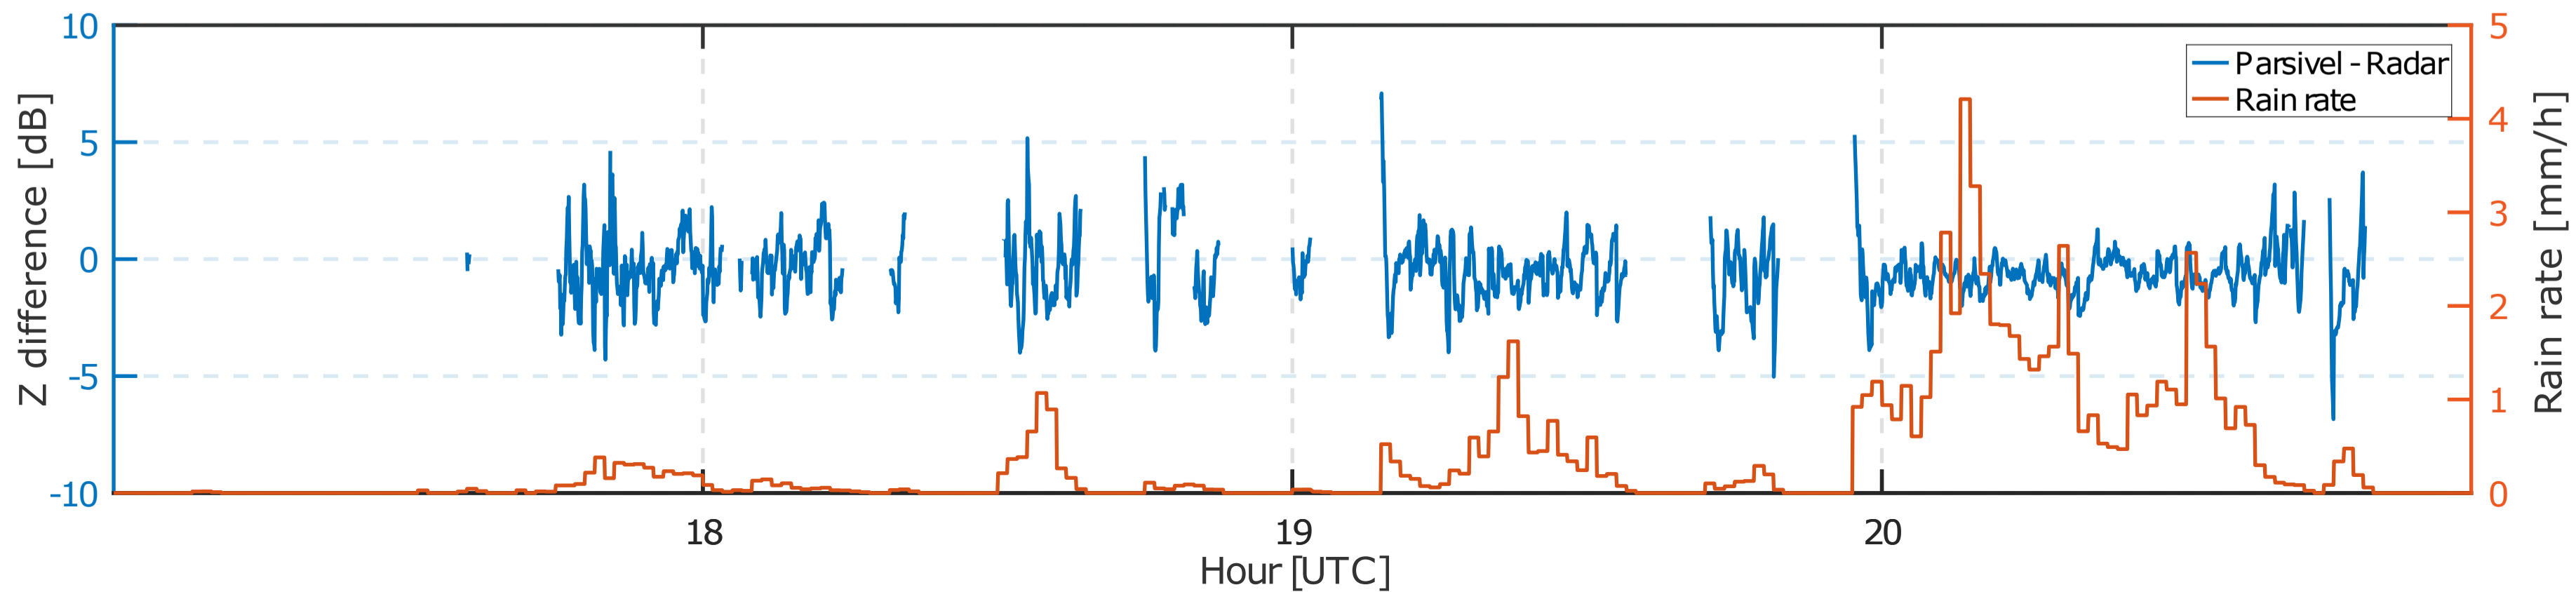

Supplement: Supplementary file 9 [file amt-2020-133-supplement.zip]

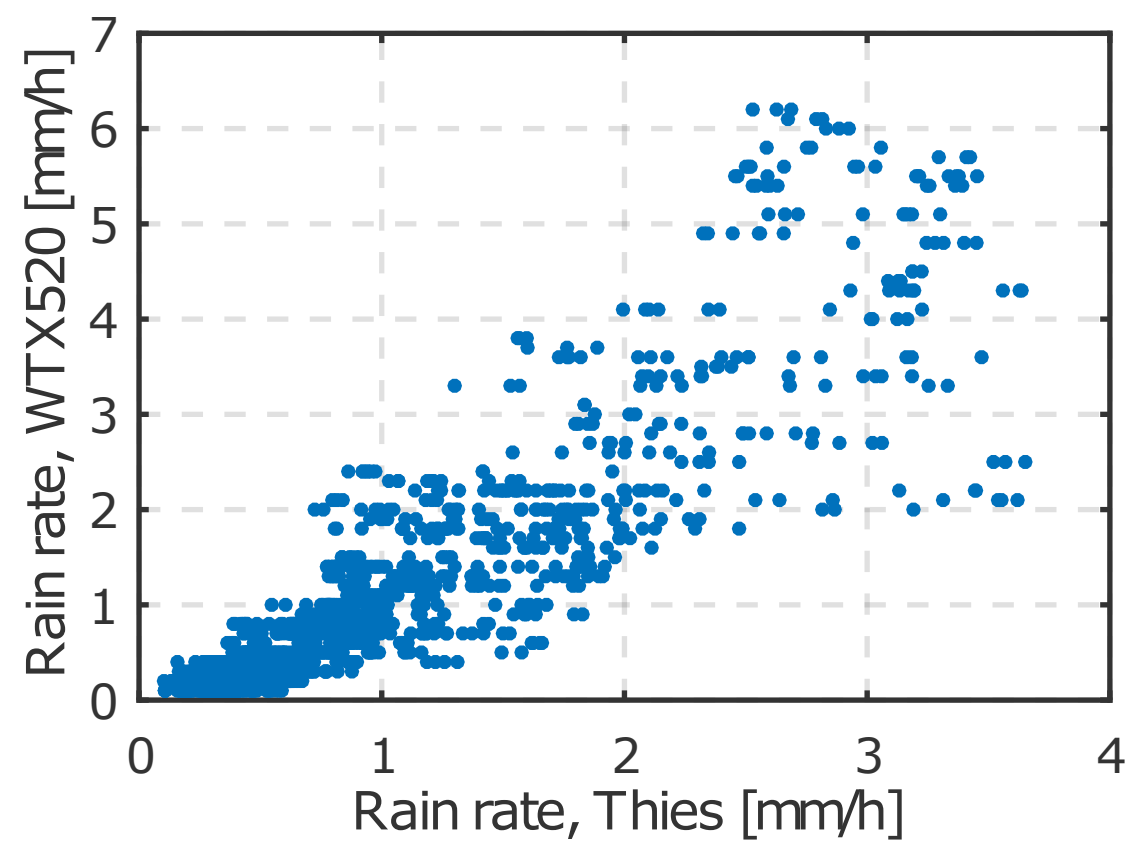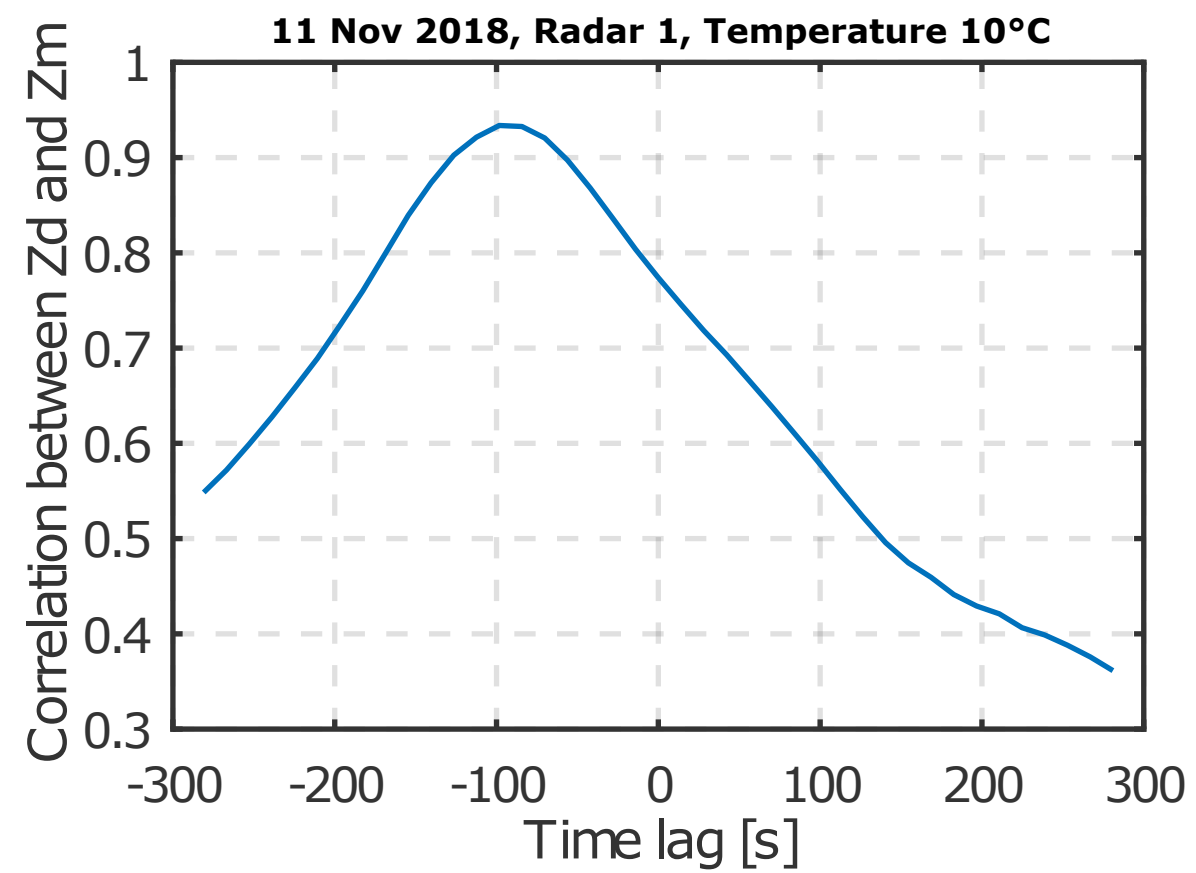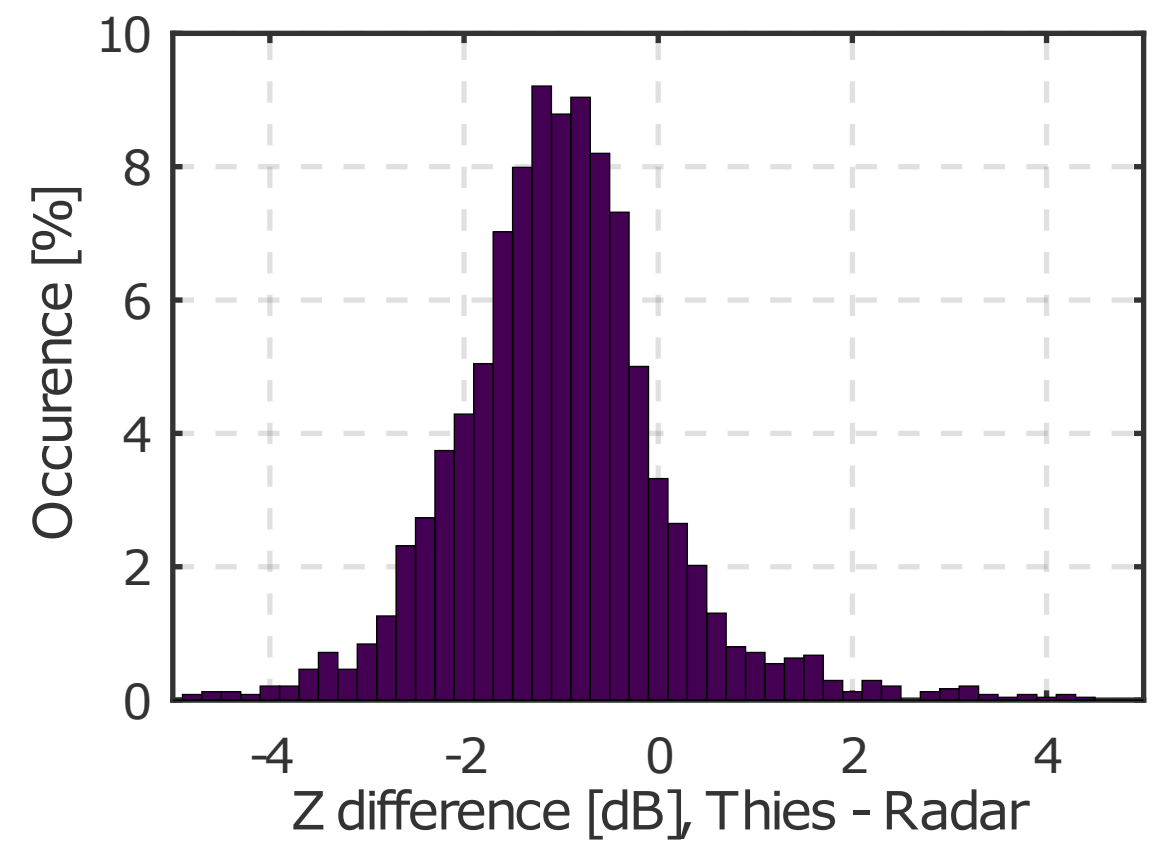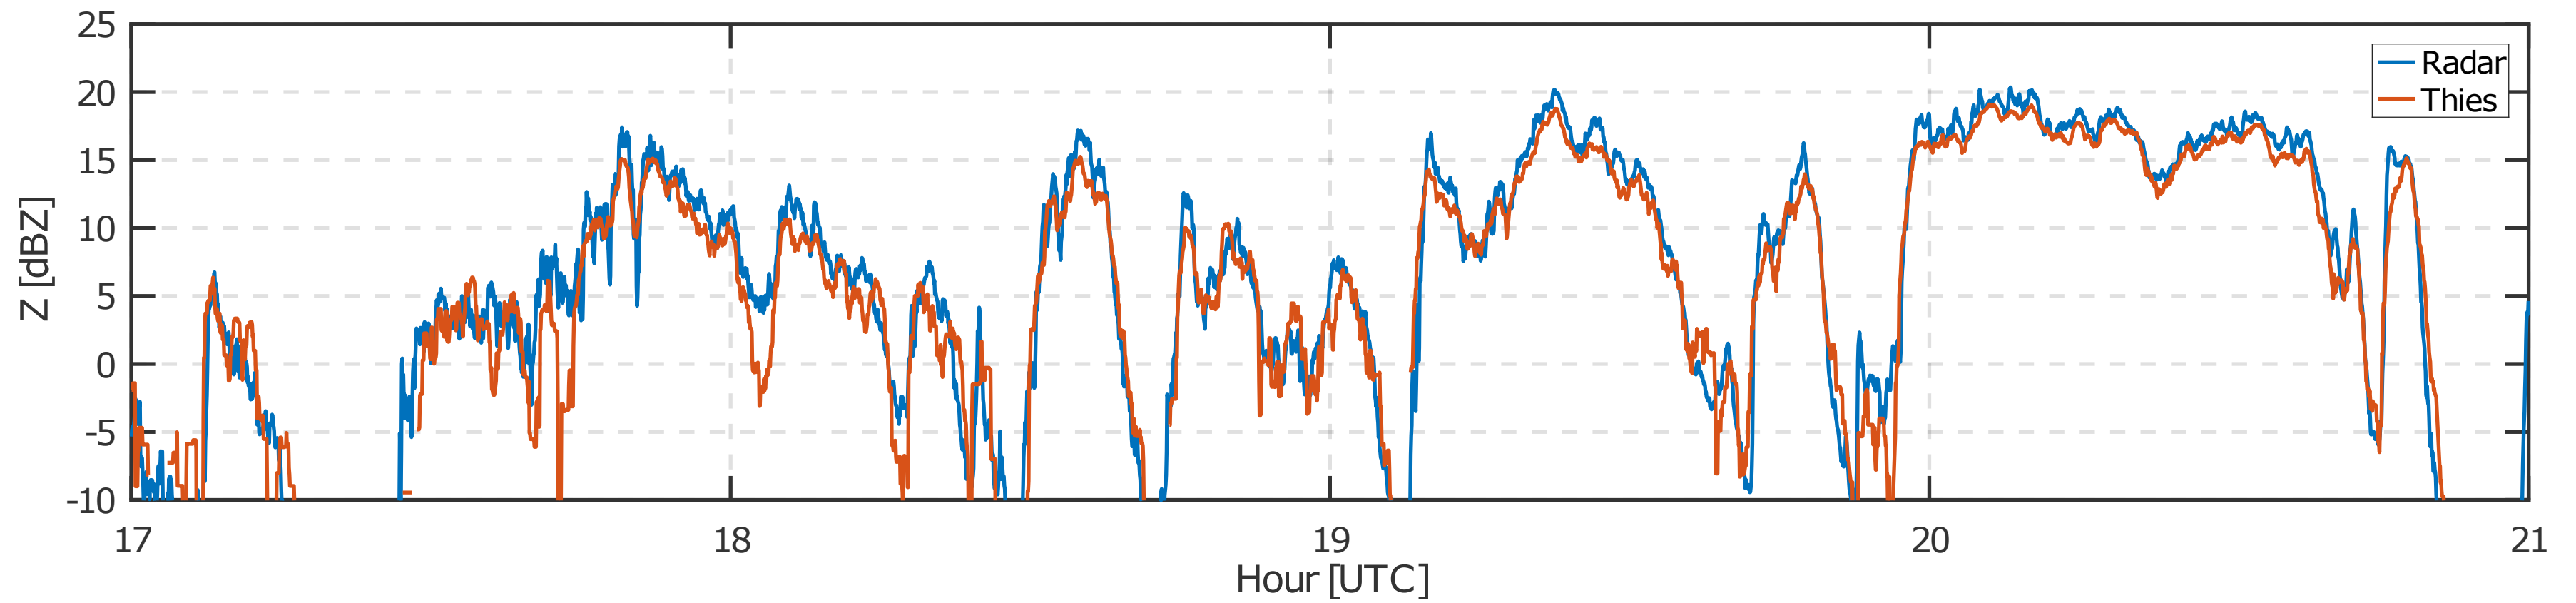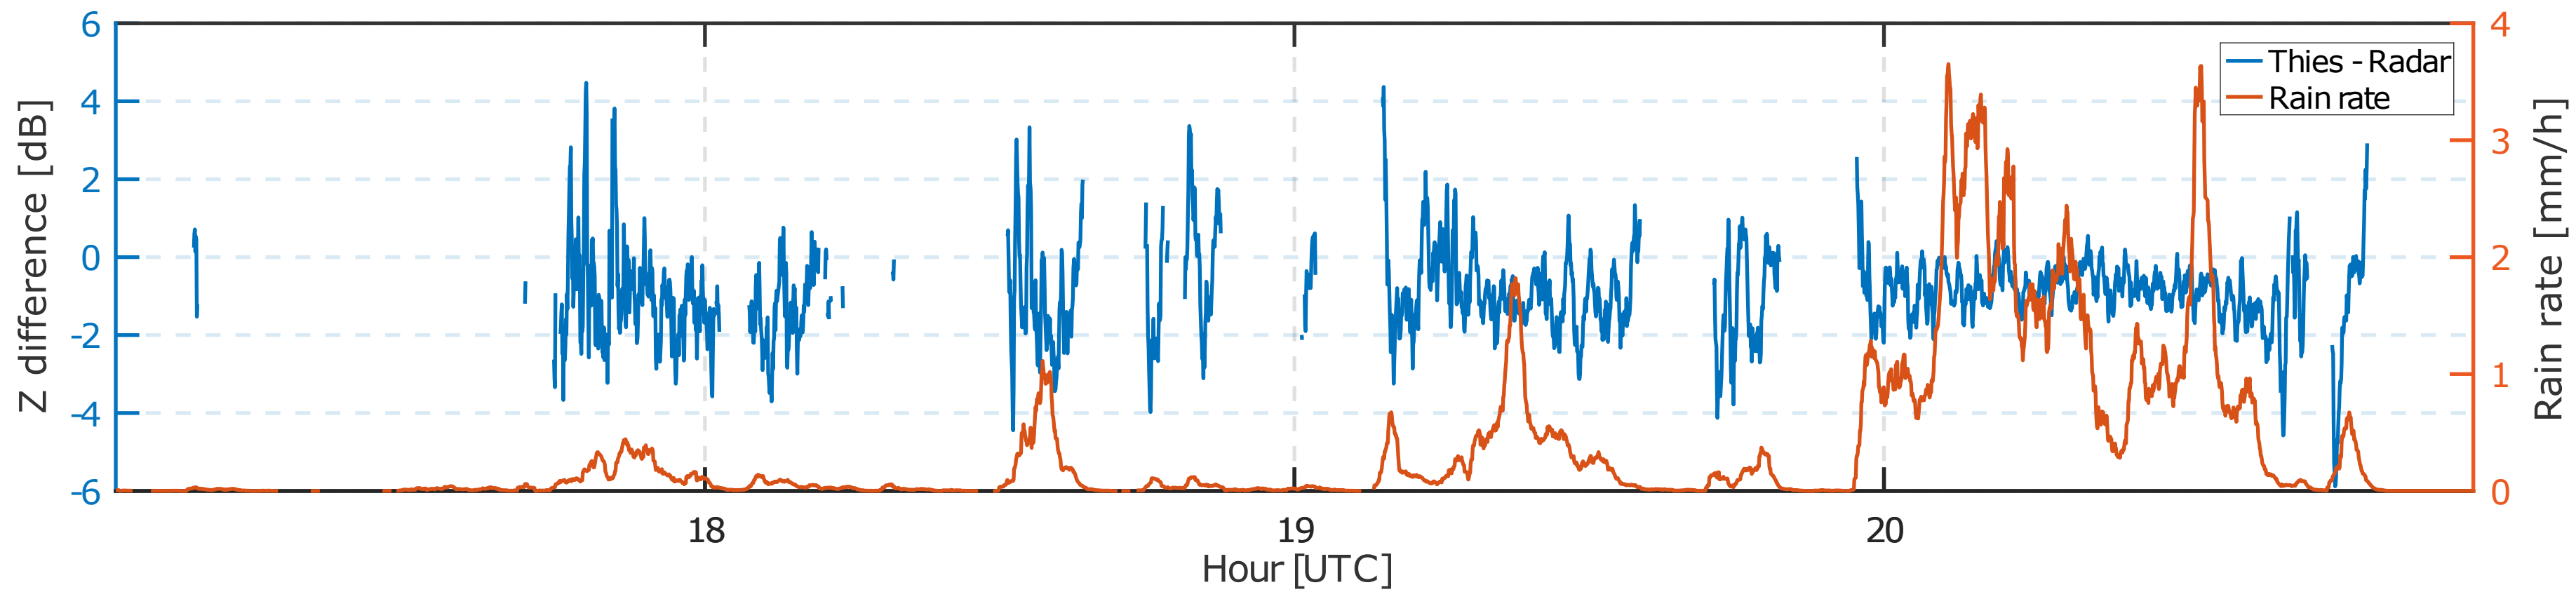

Supplement: Supplementary file 10 [file amt-2020-133-supplement.zip]

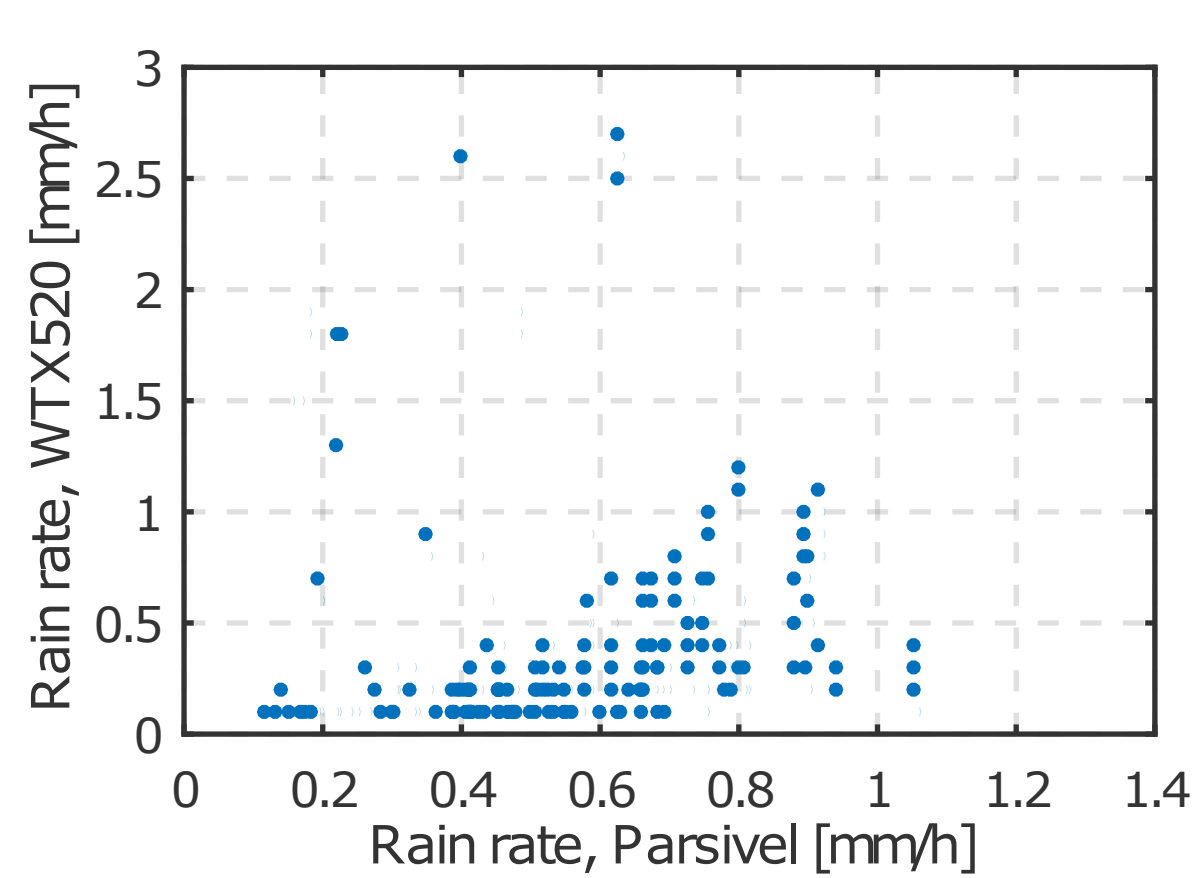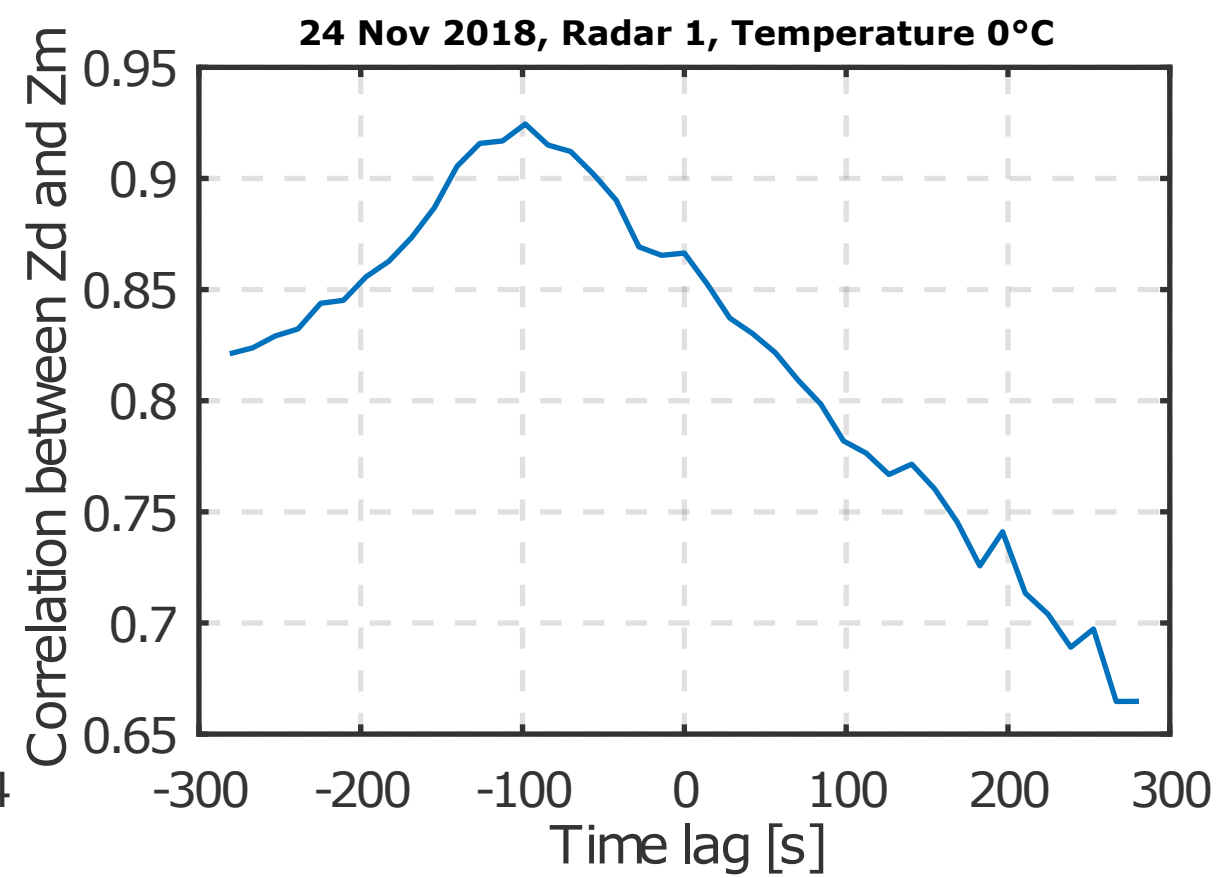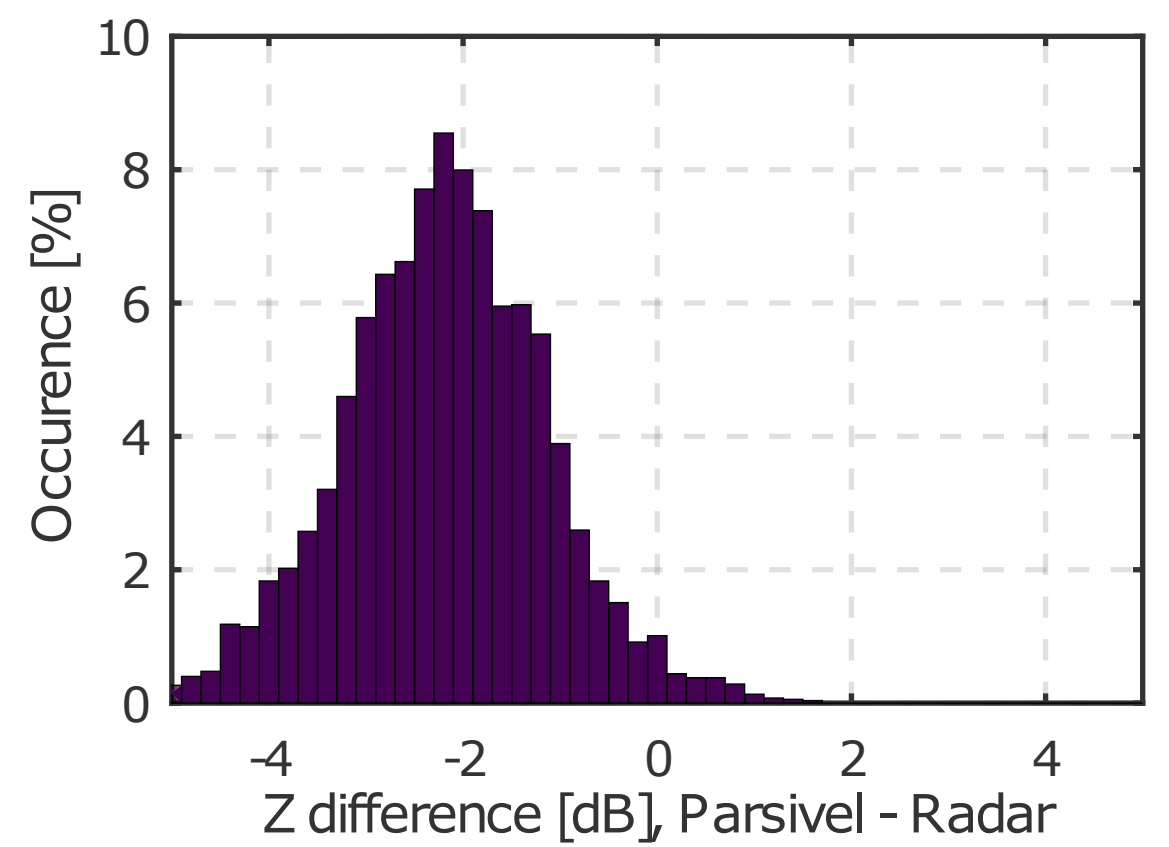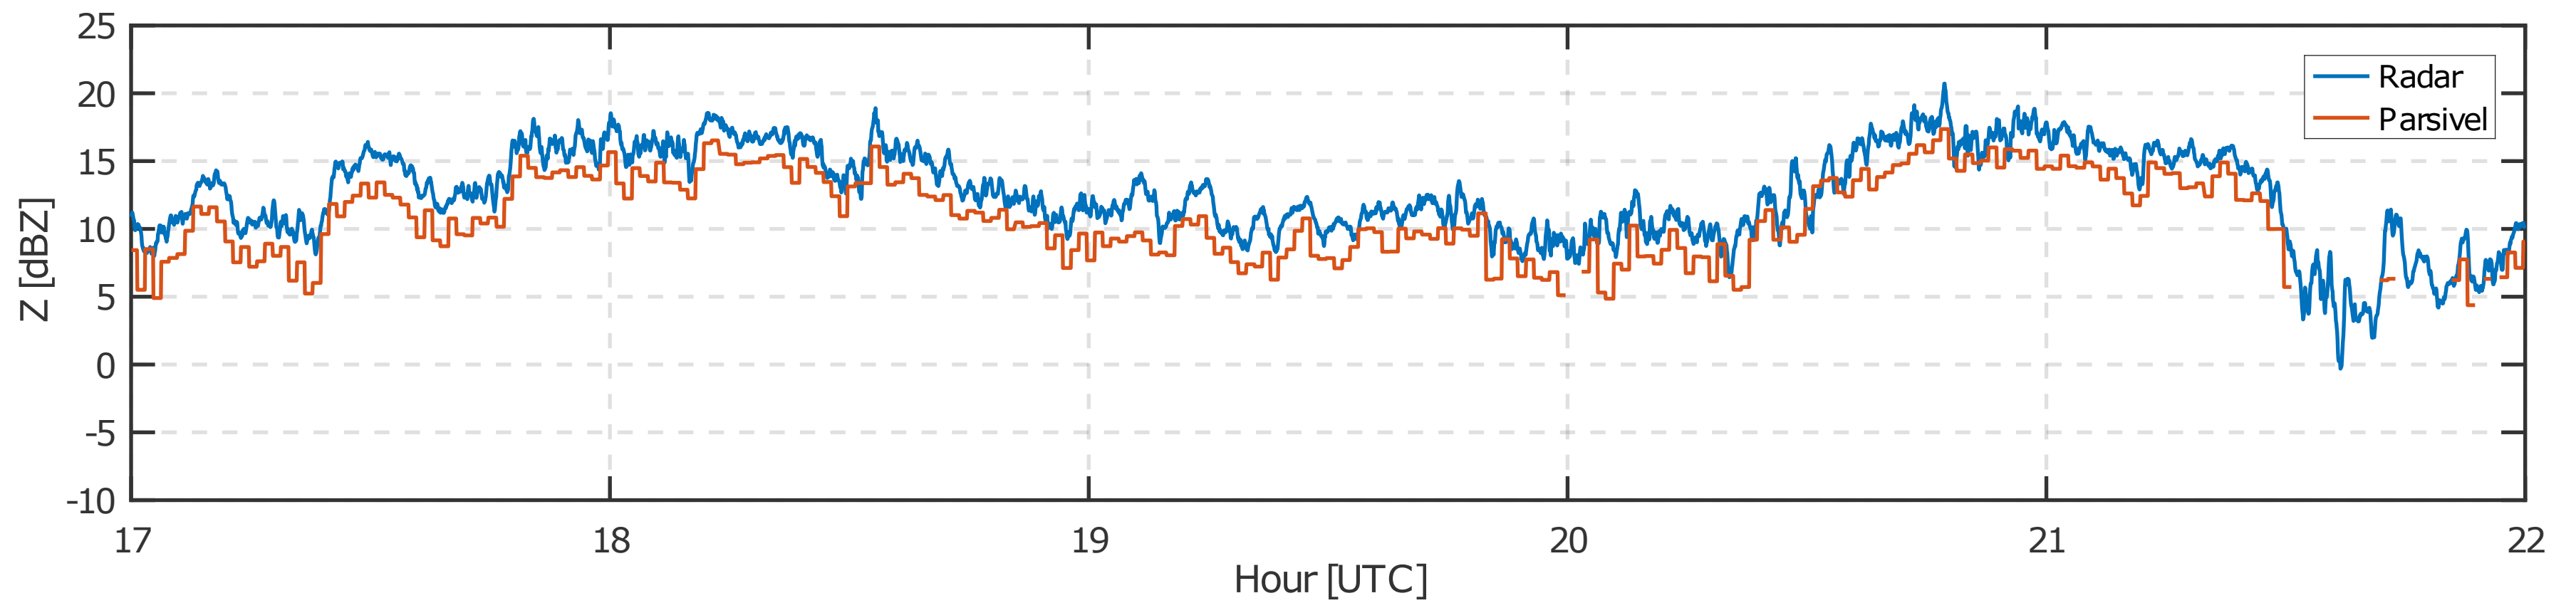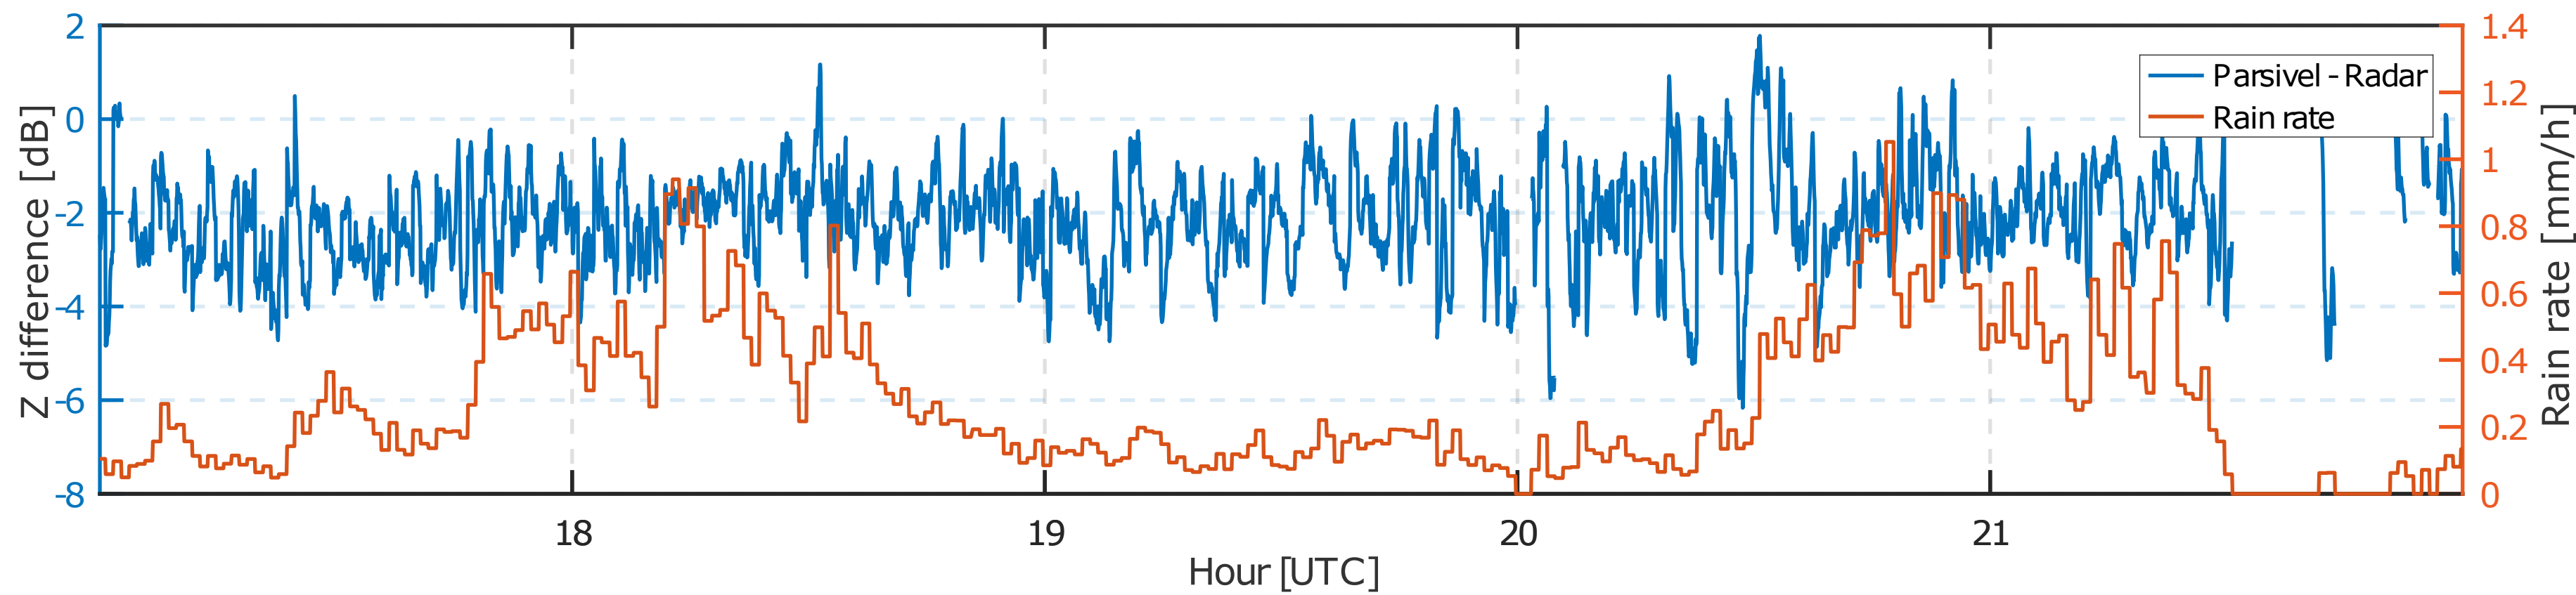

Supplement: Supplementary file 11 [file amt-2020-133-supplement.zip]

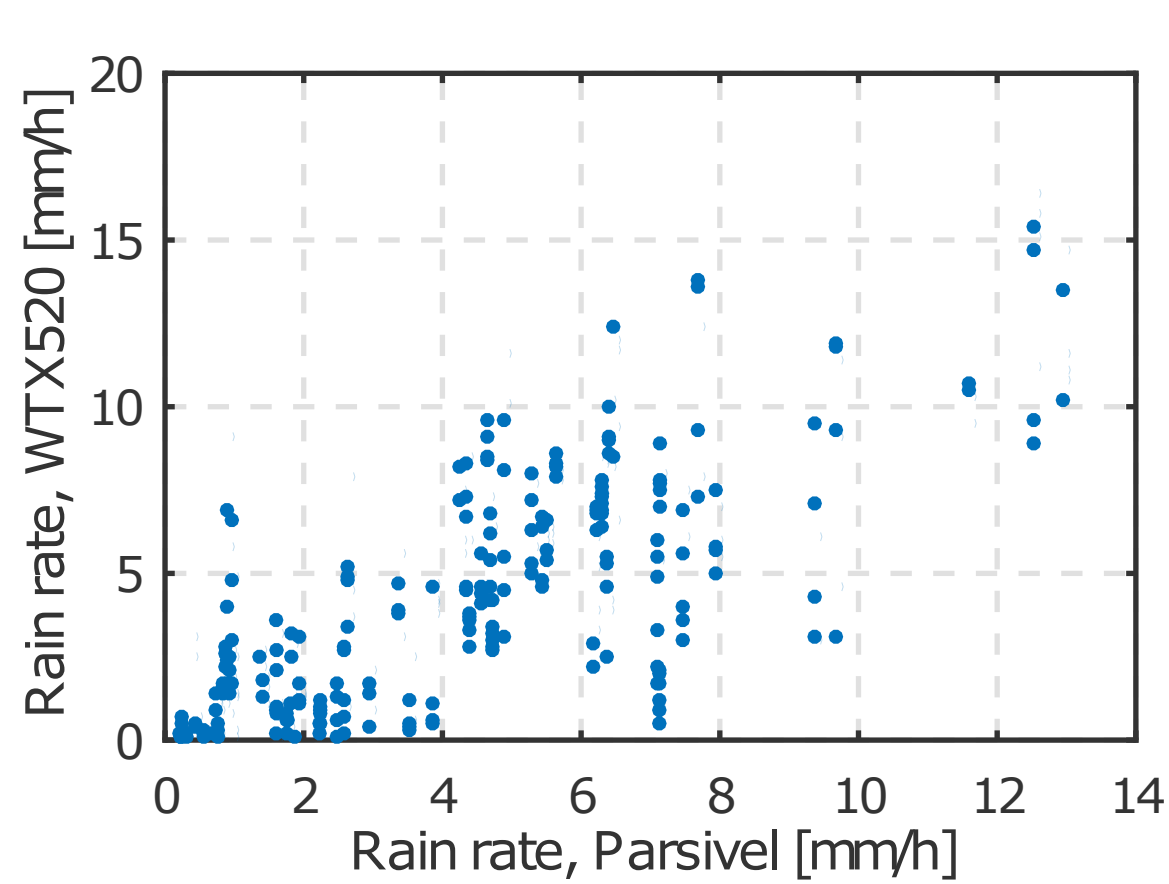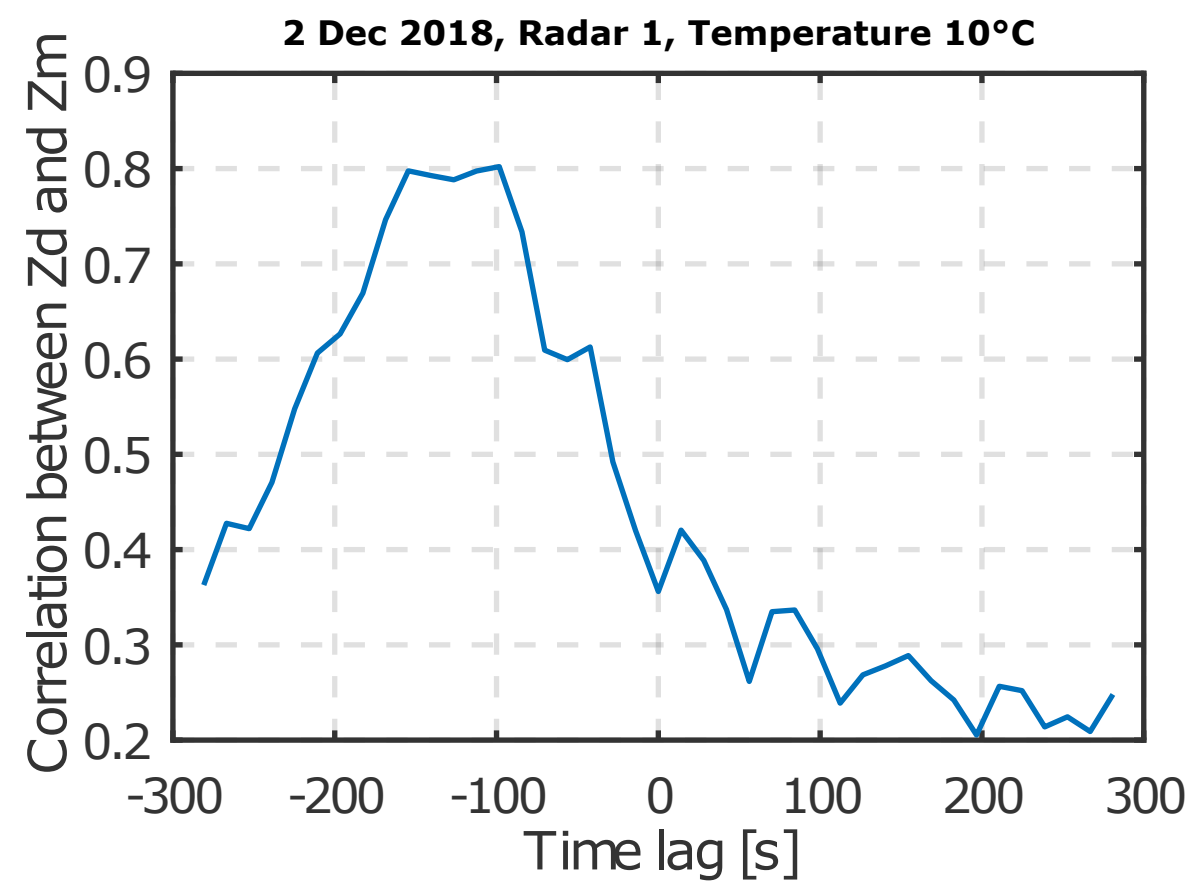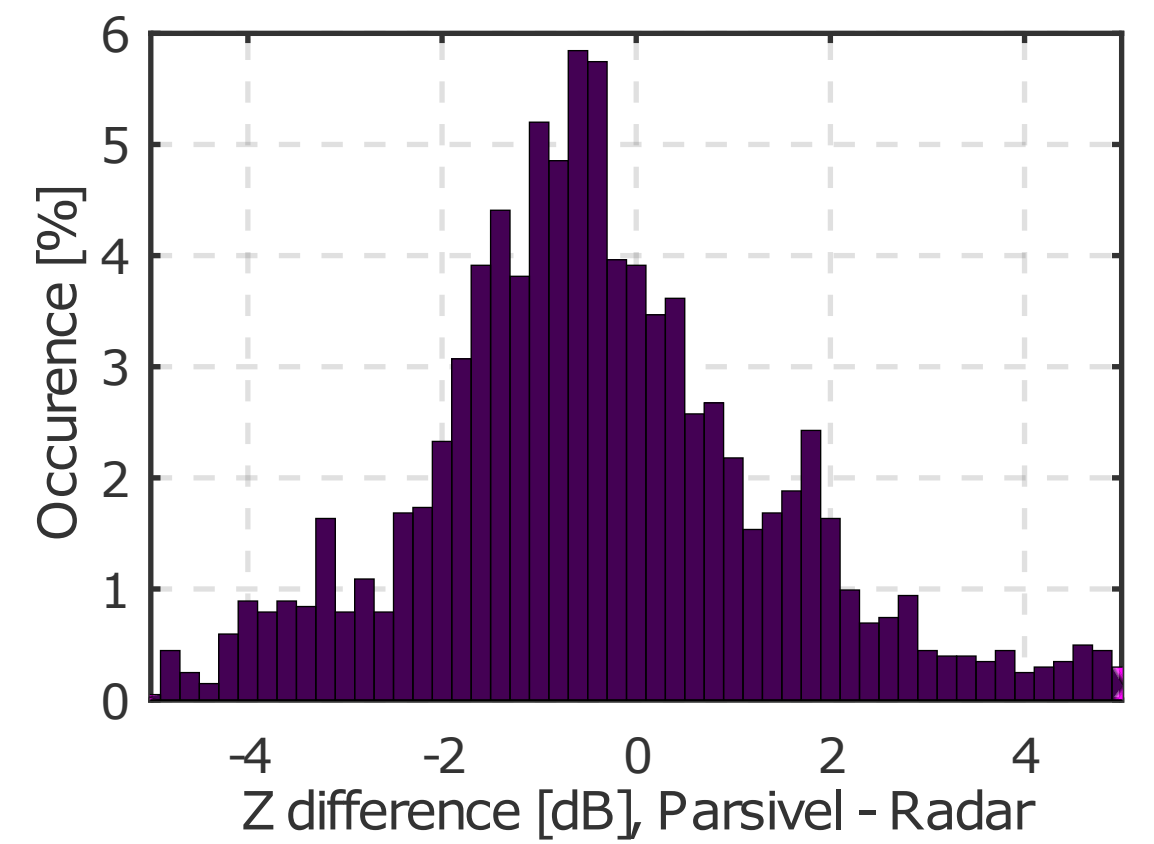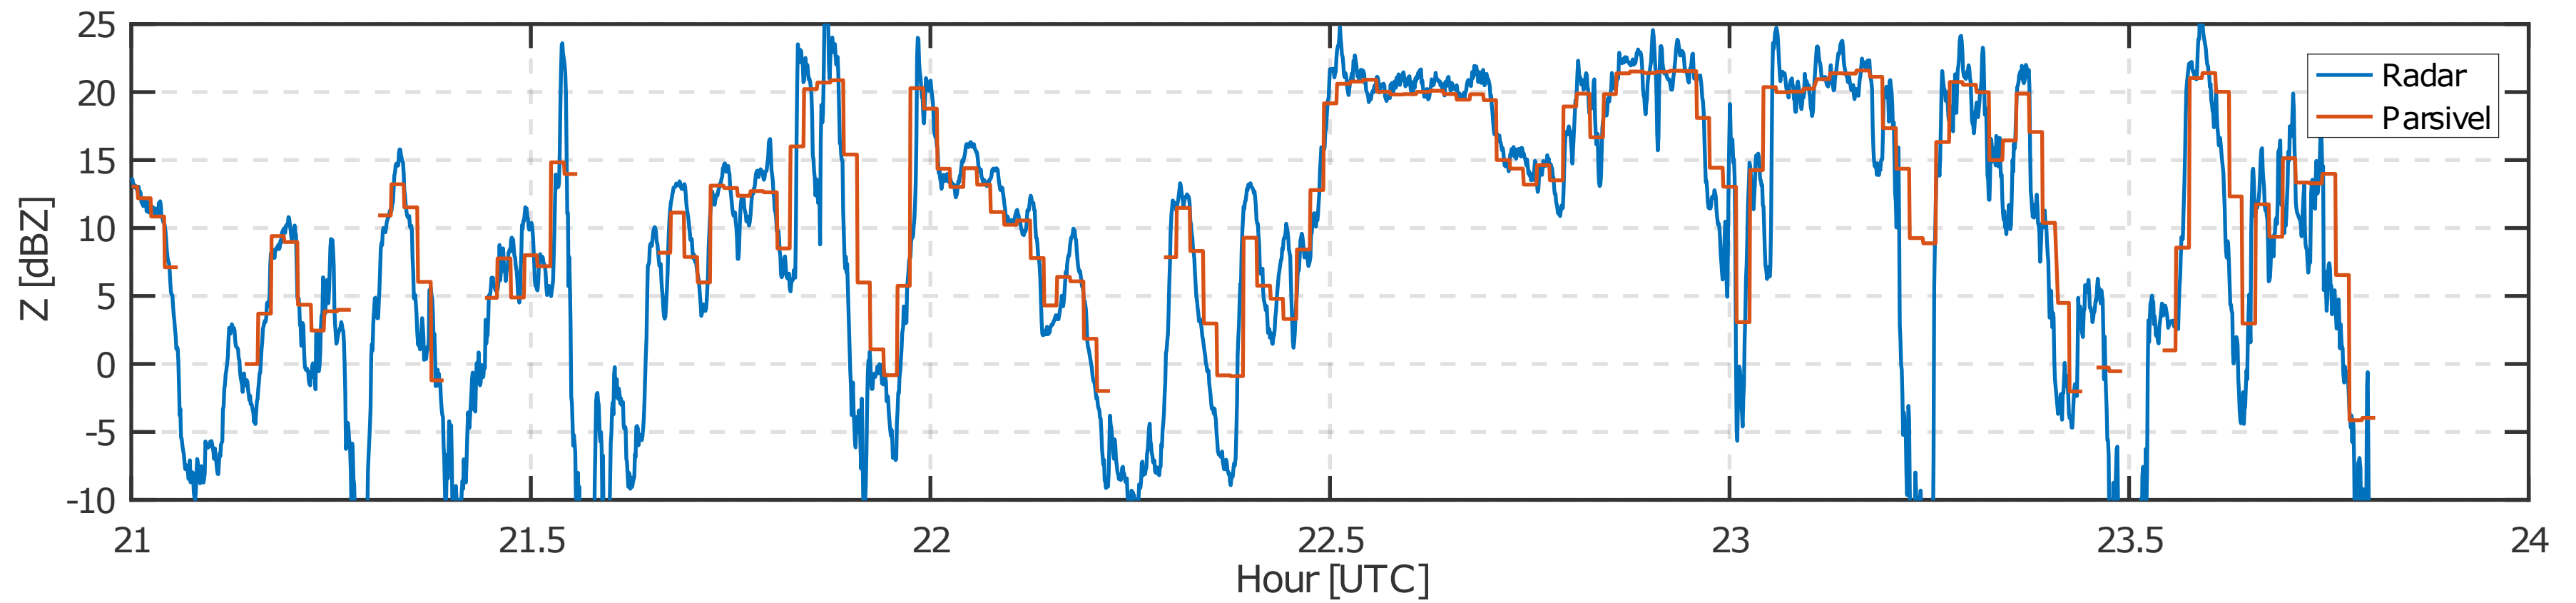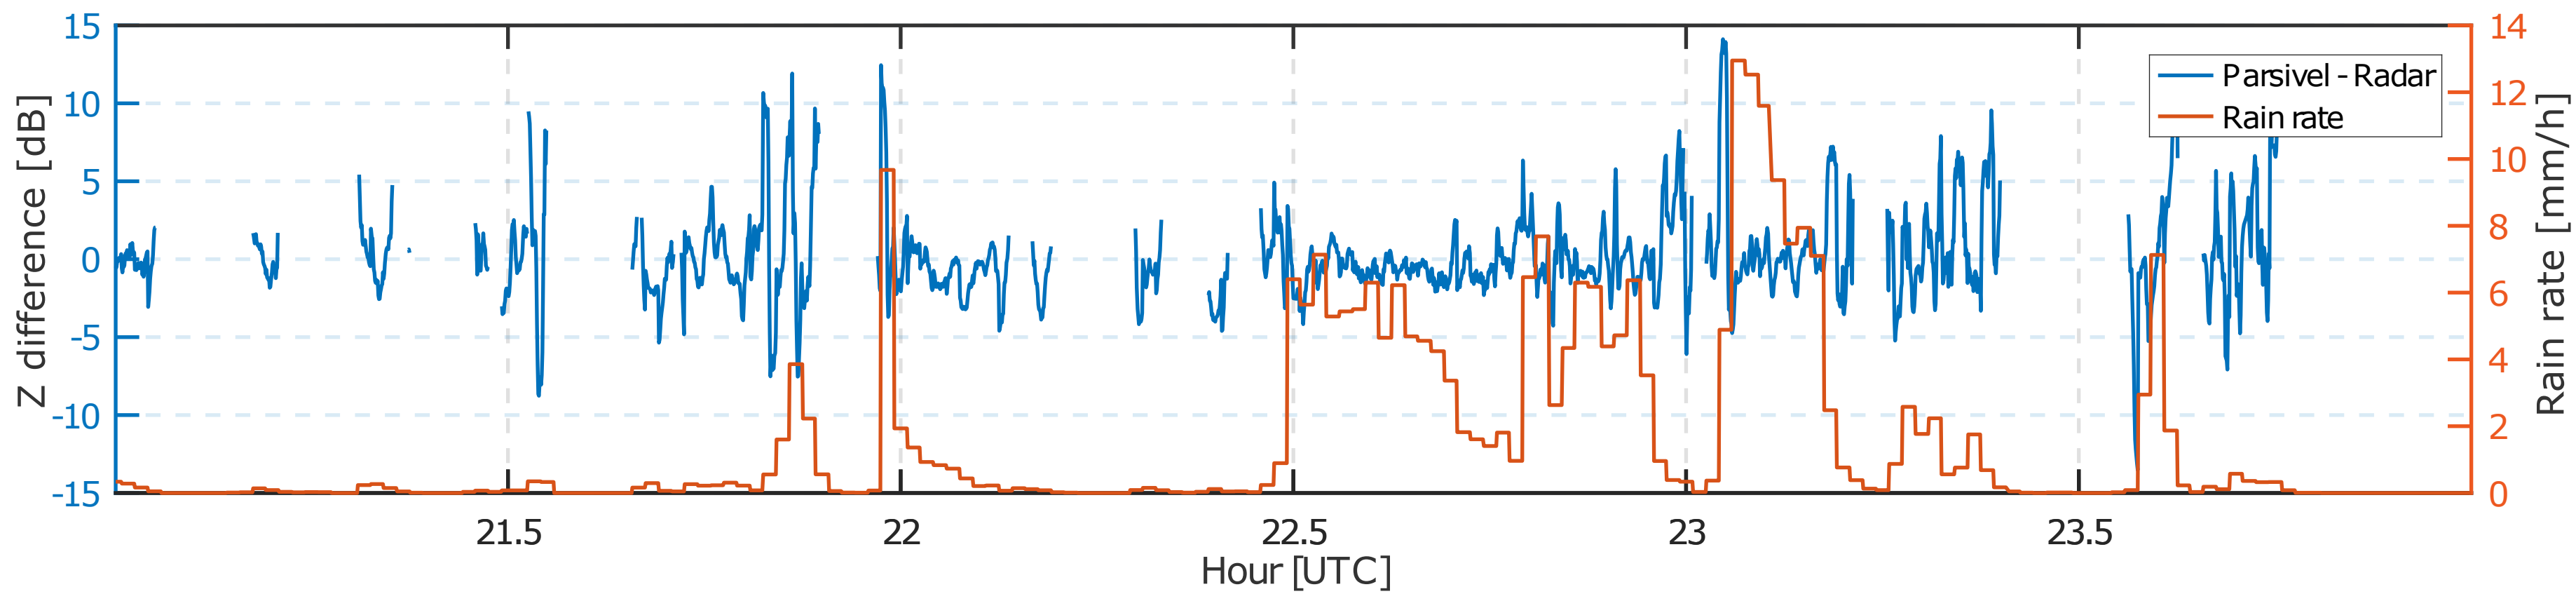

Supplement: Supplementary file 12 [file amt-2020-133-supplement.zip]

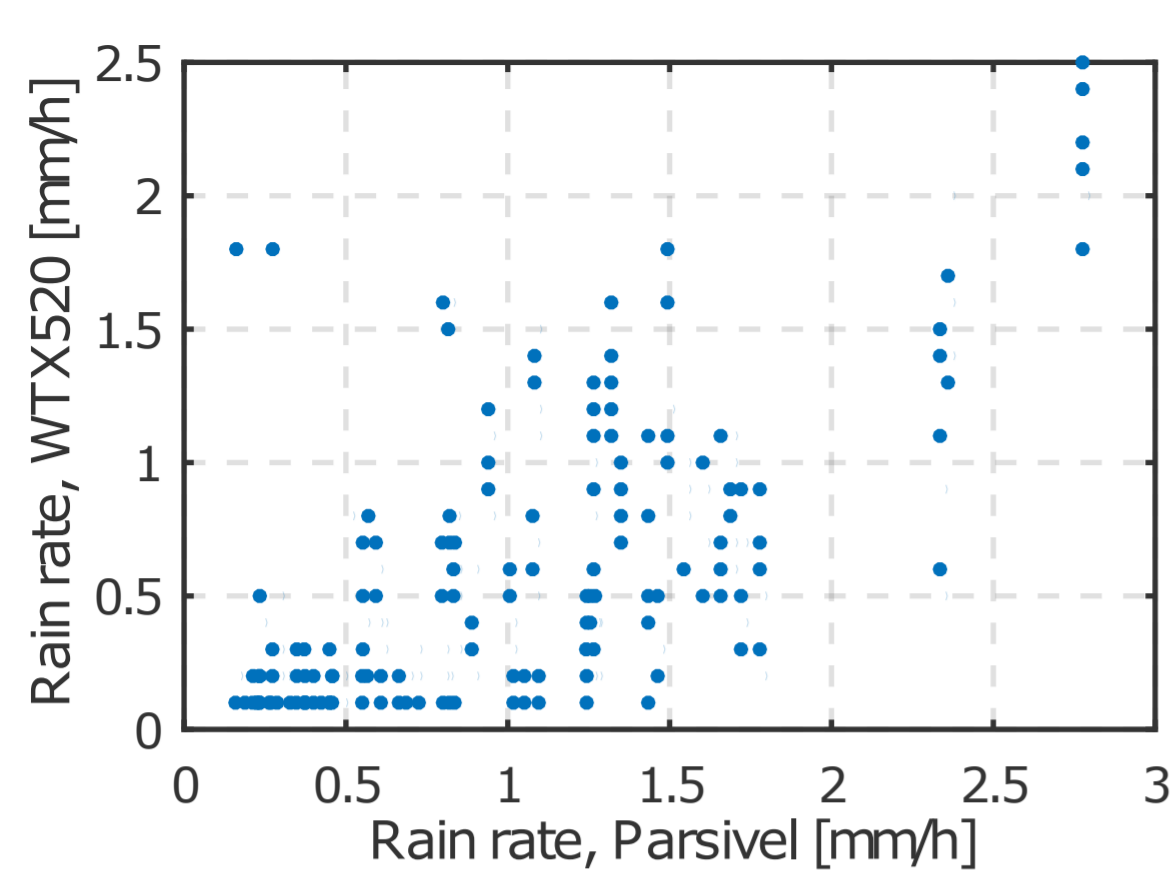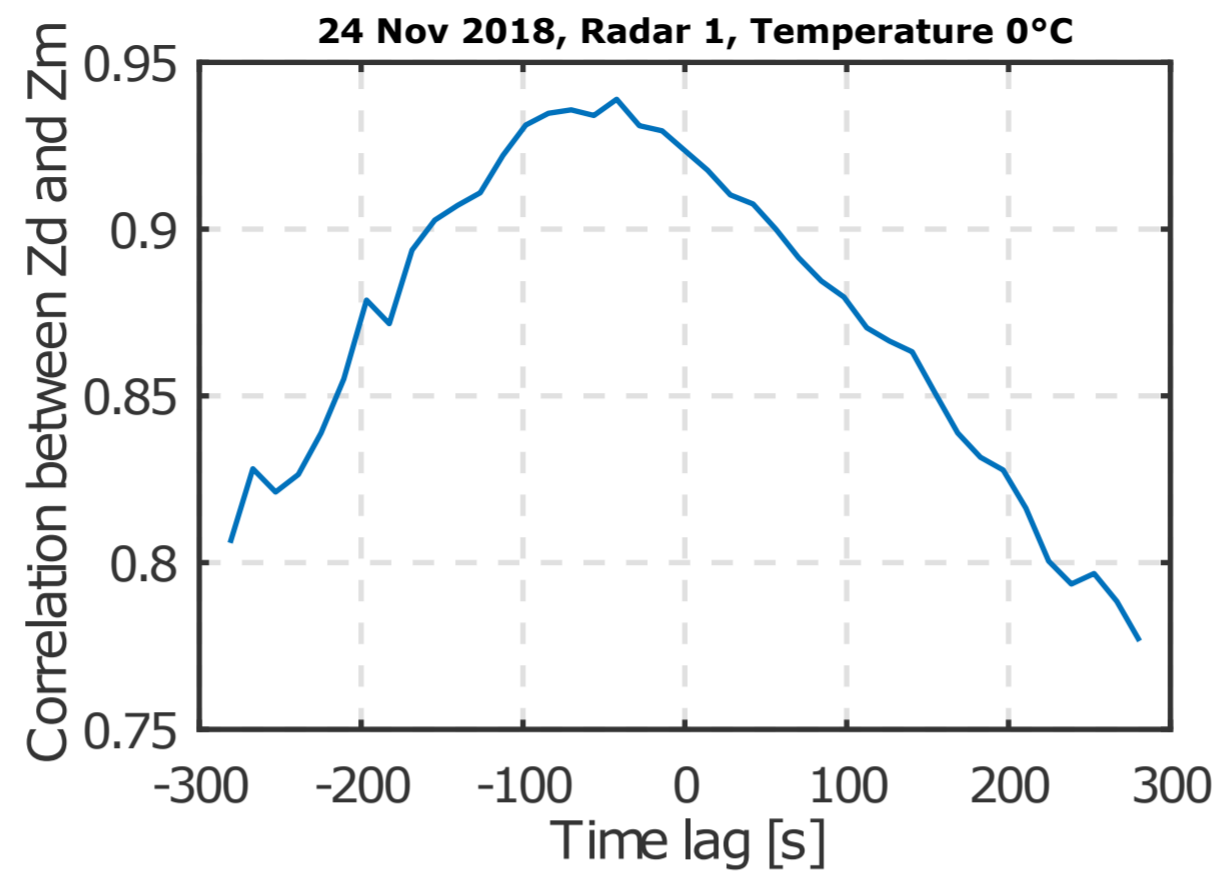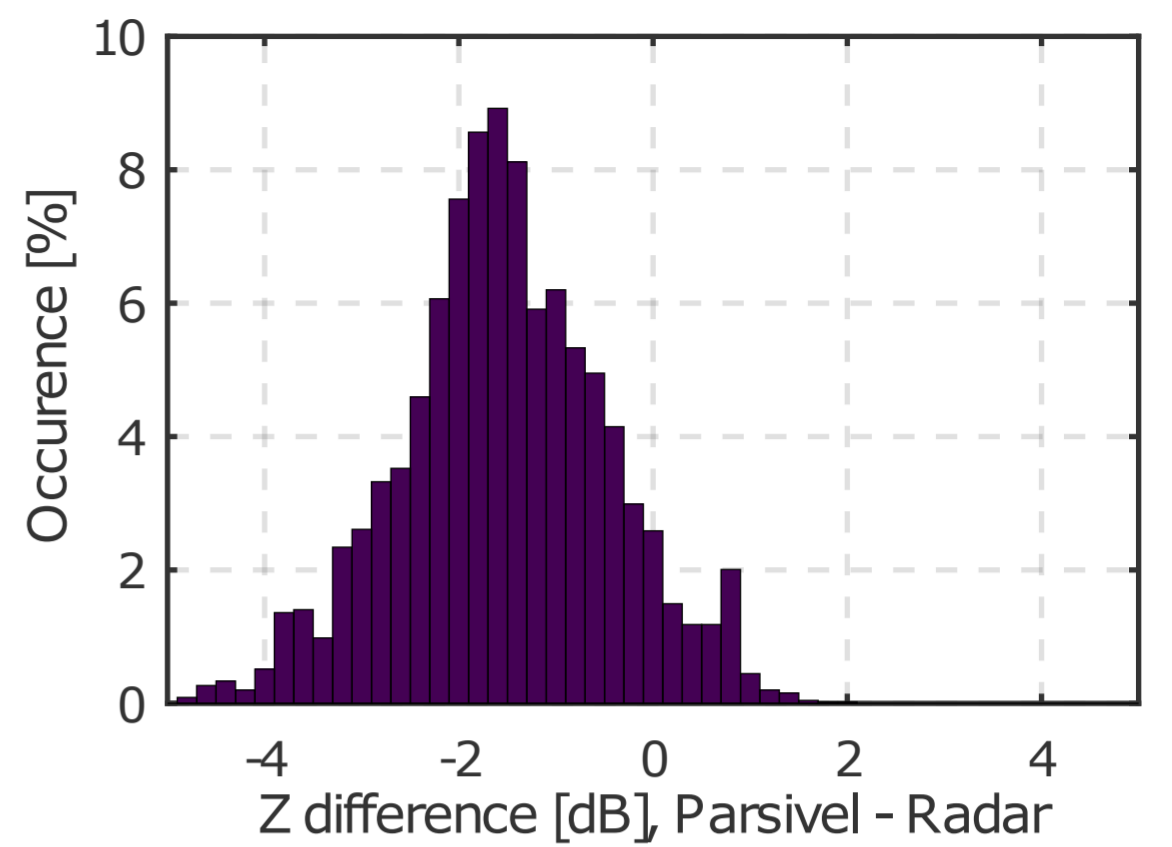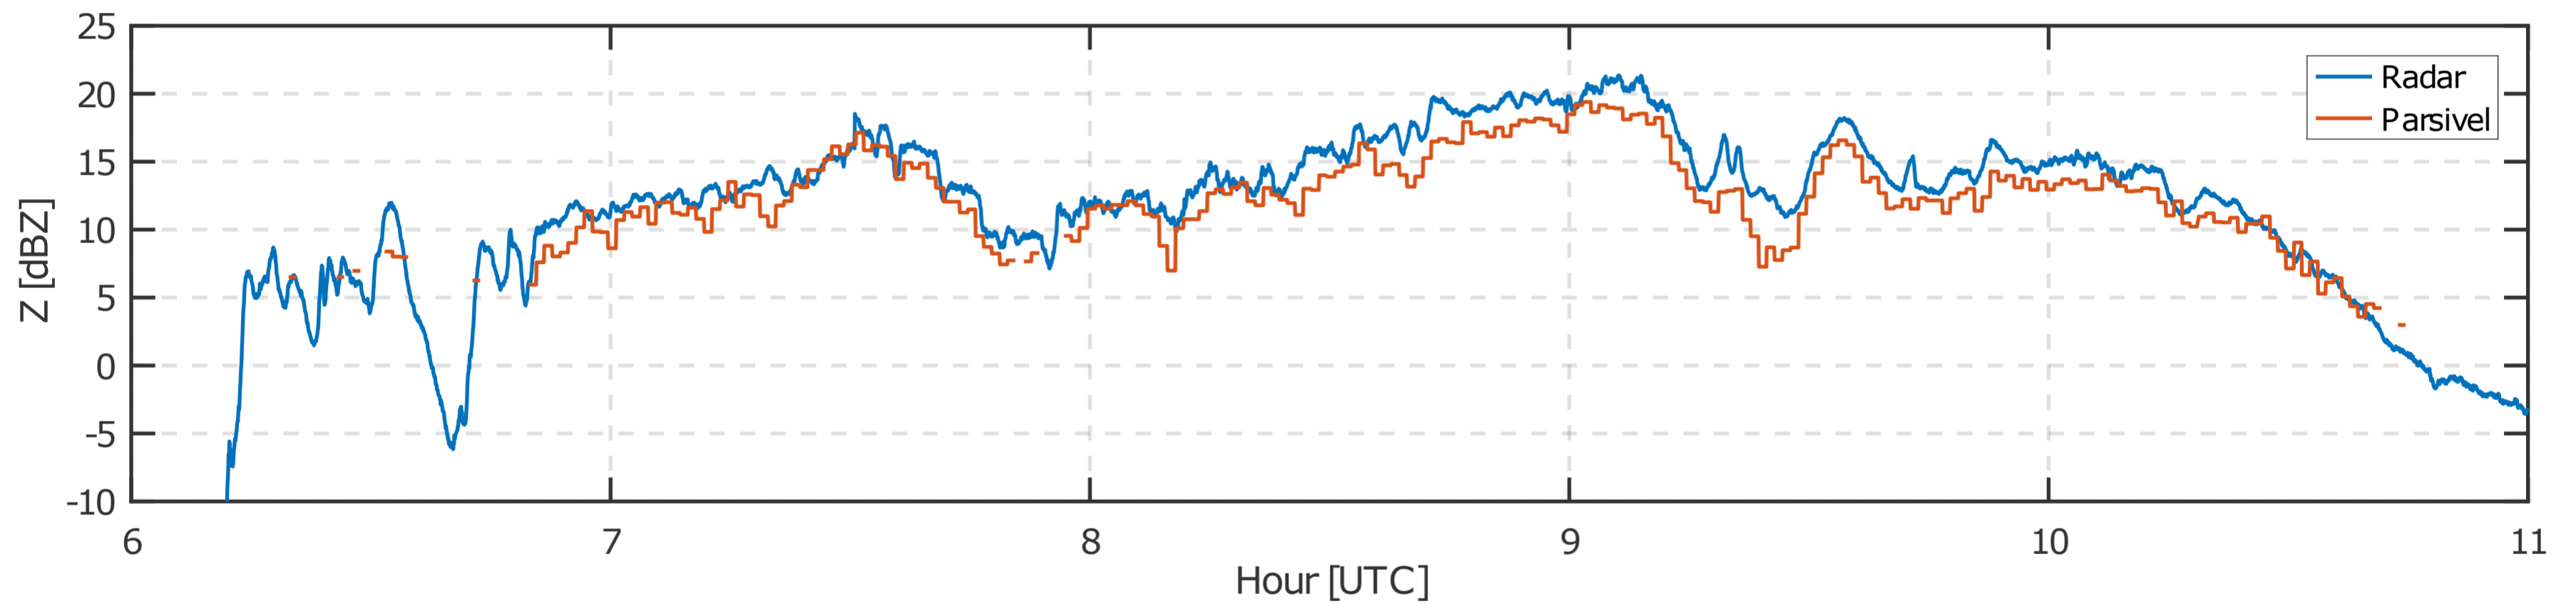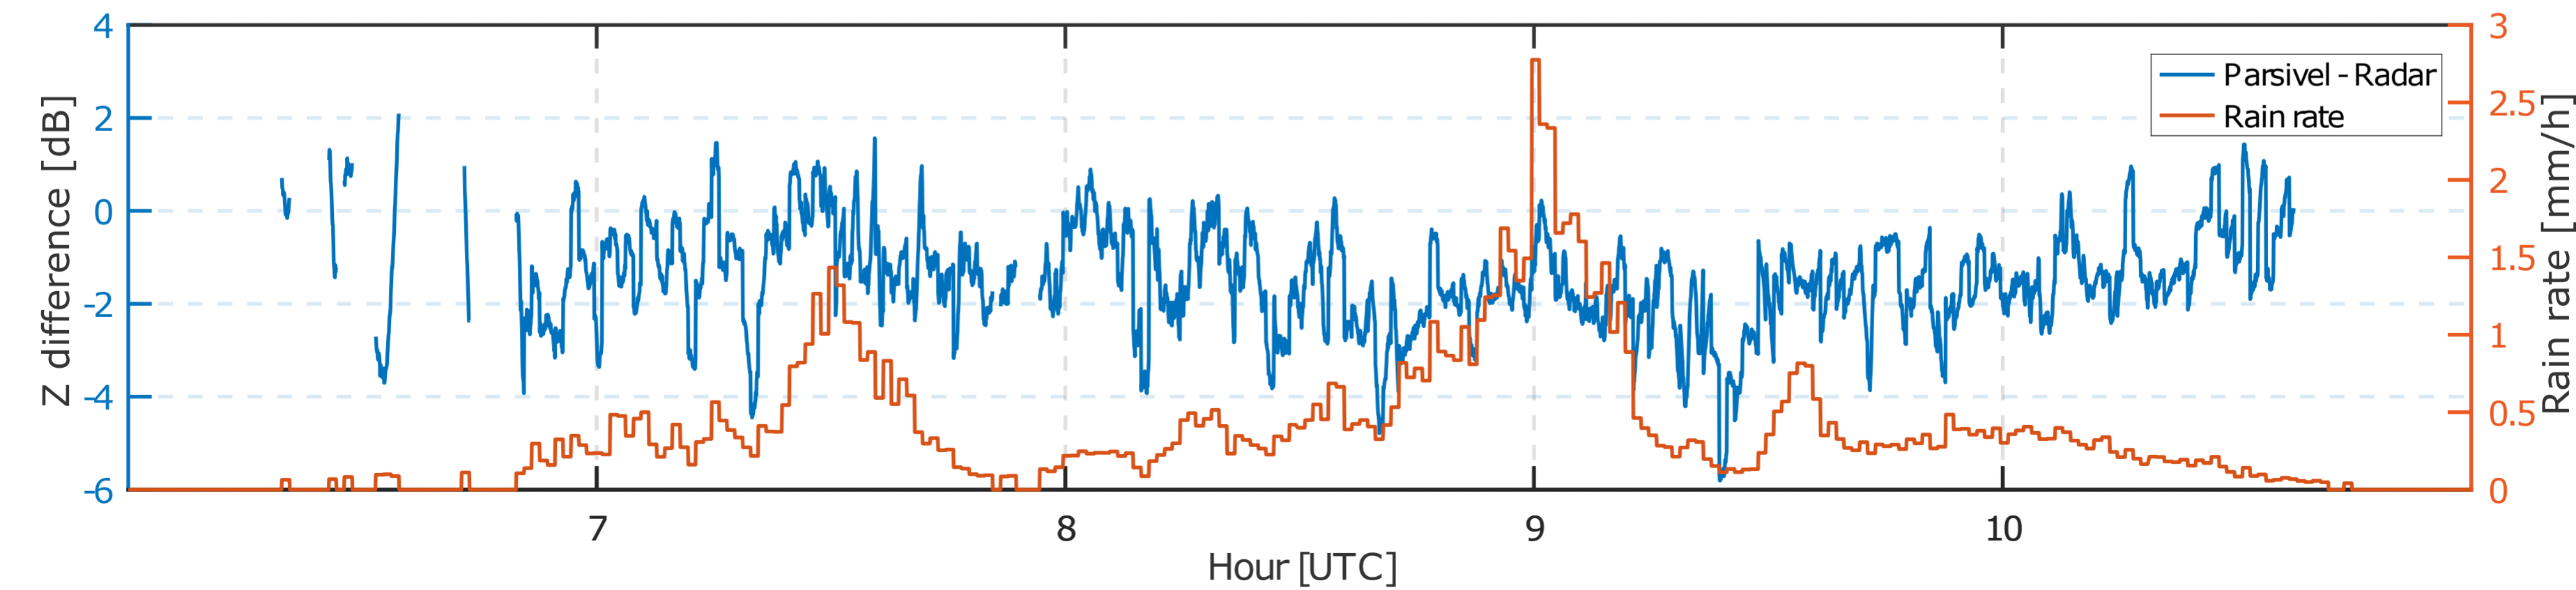

Supplement: Supplementary file 13 [file amt-2020-133-supplement.zip]

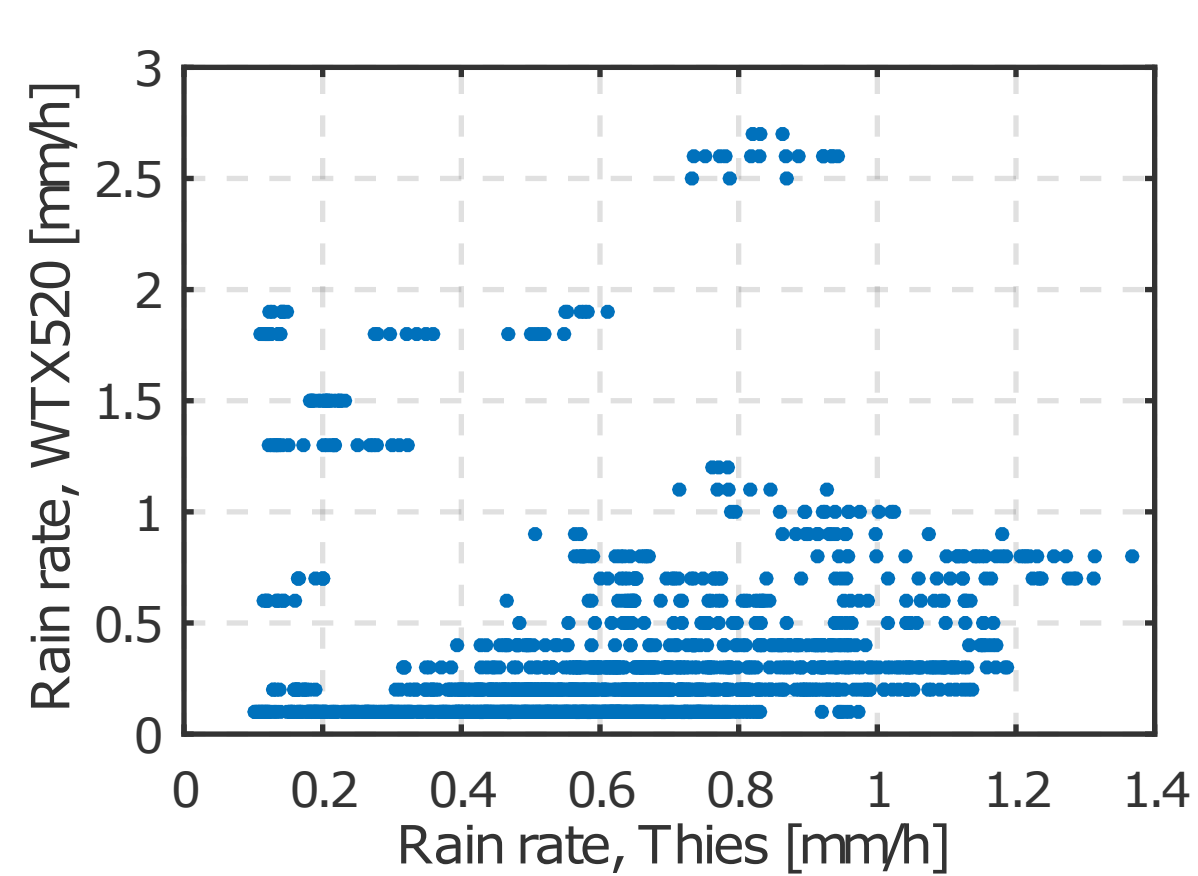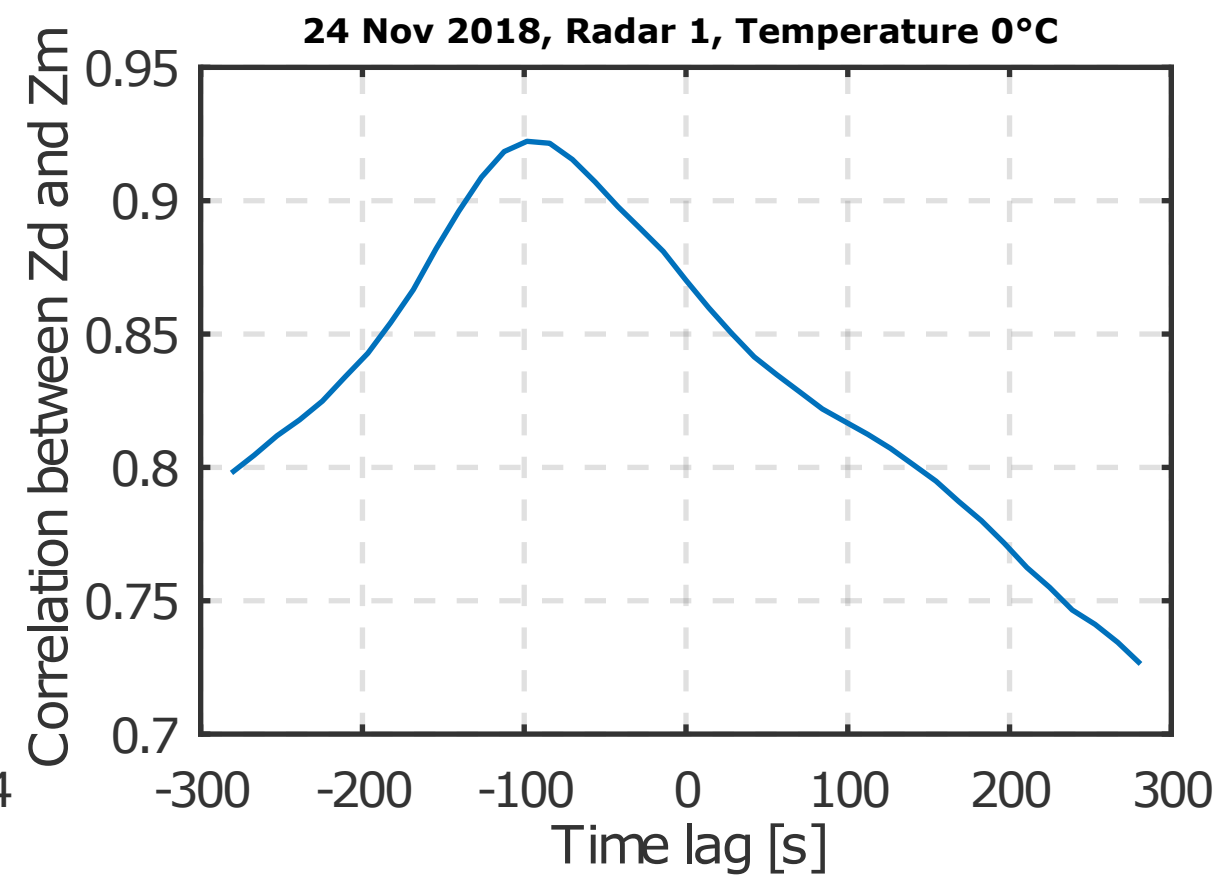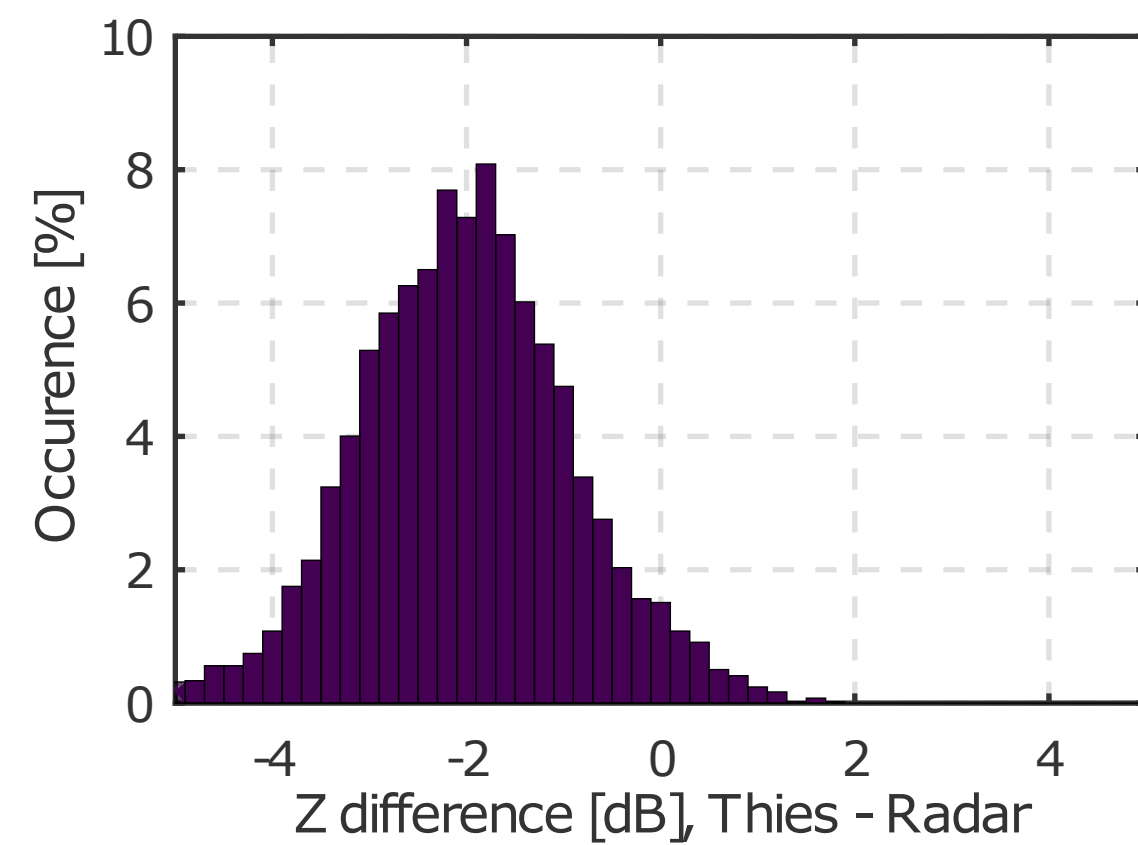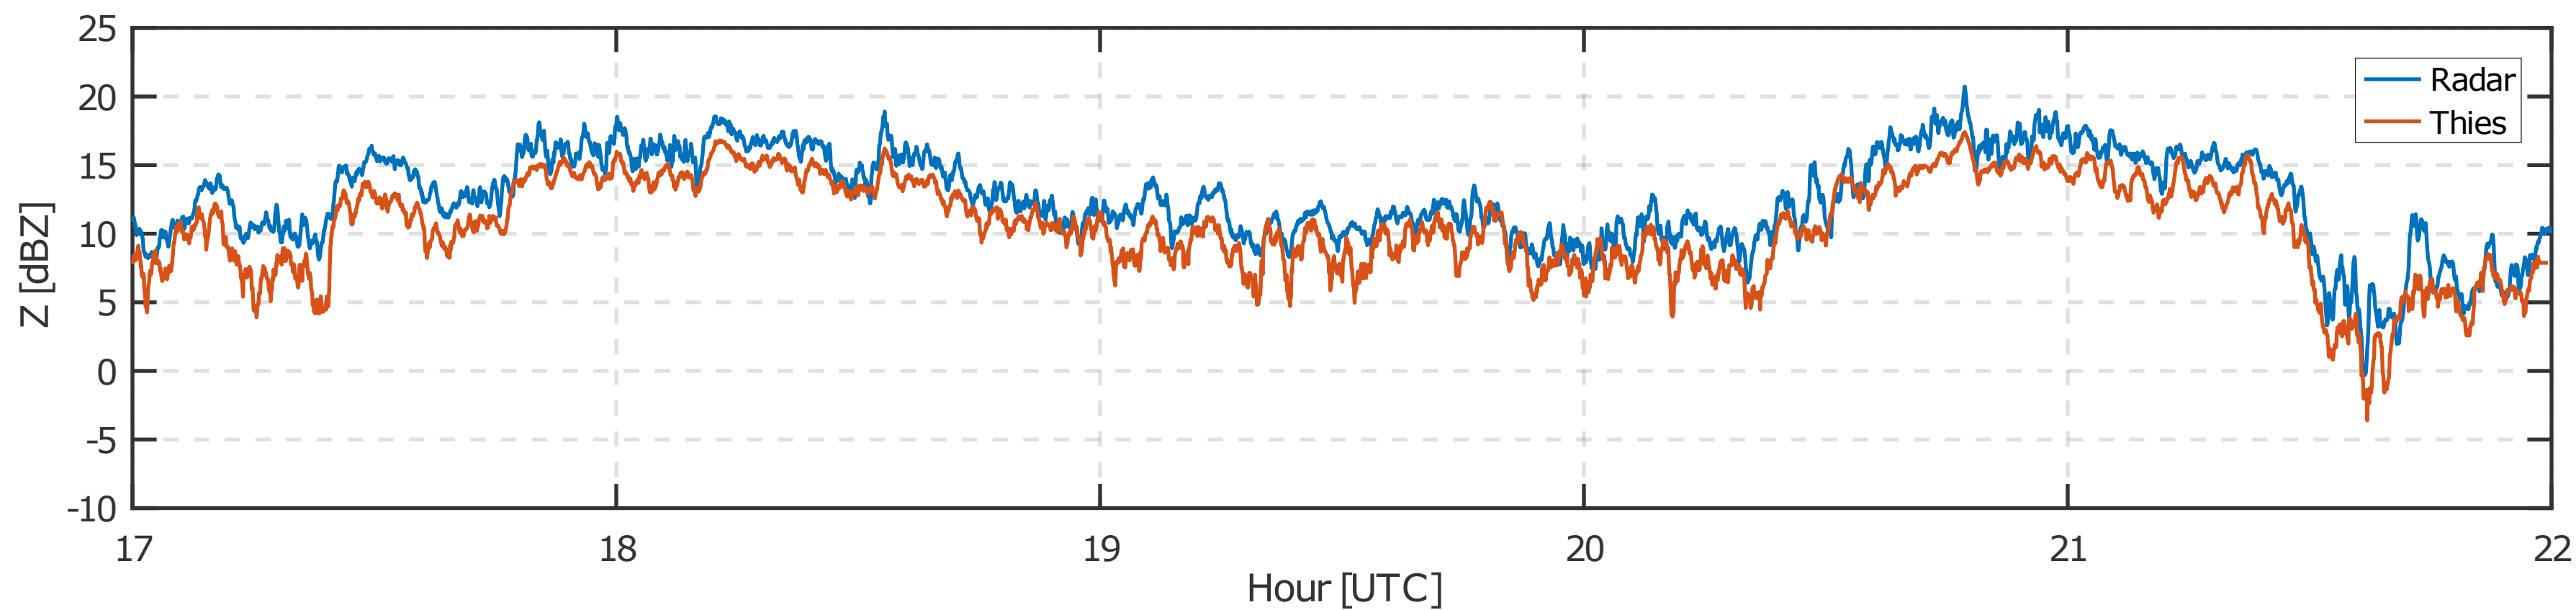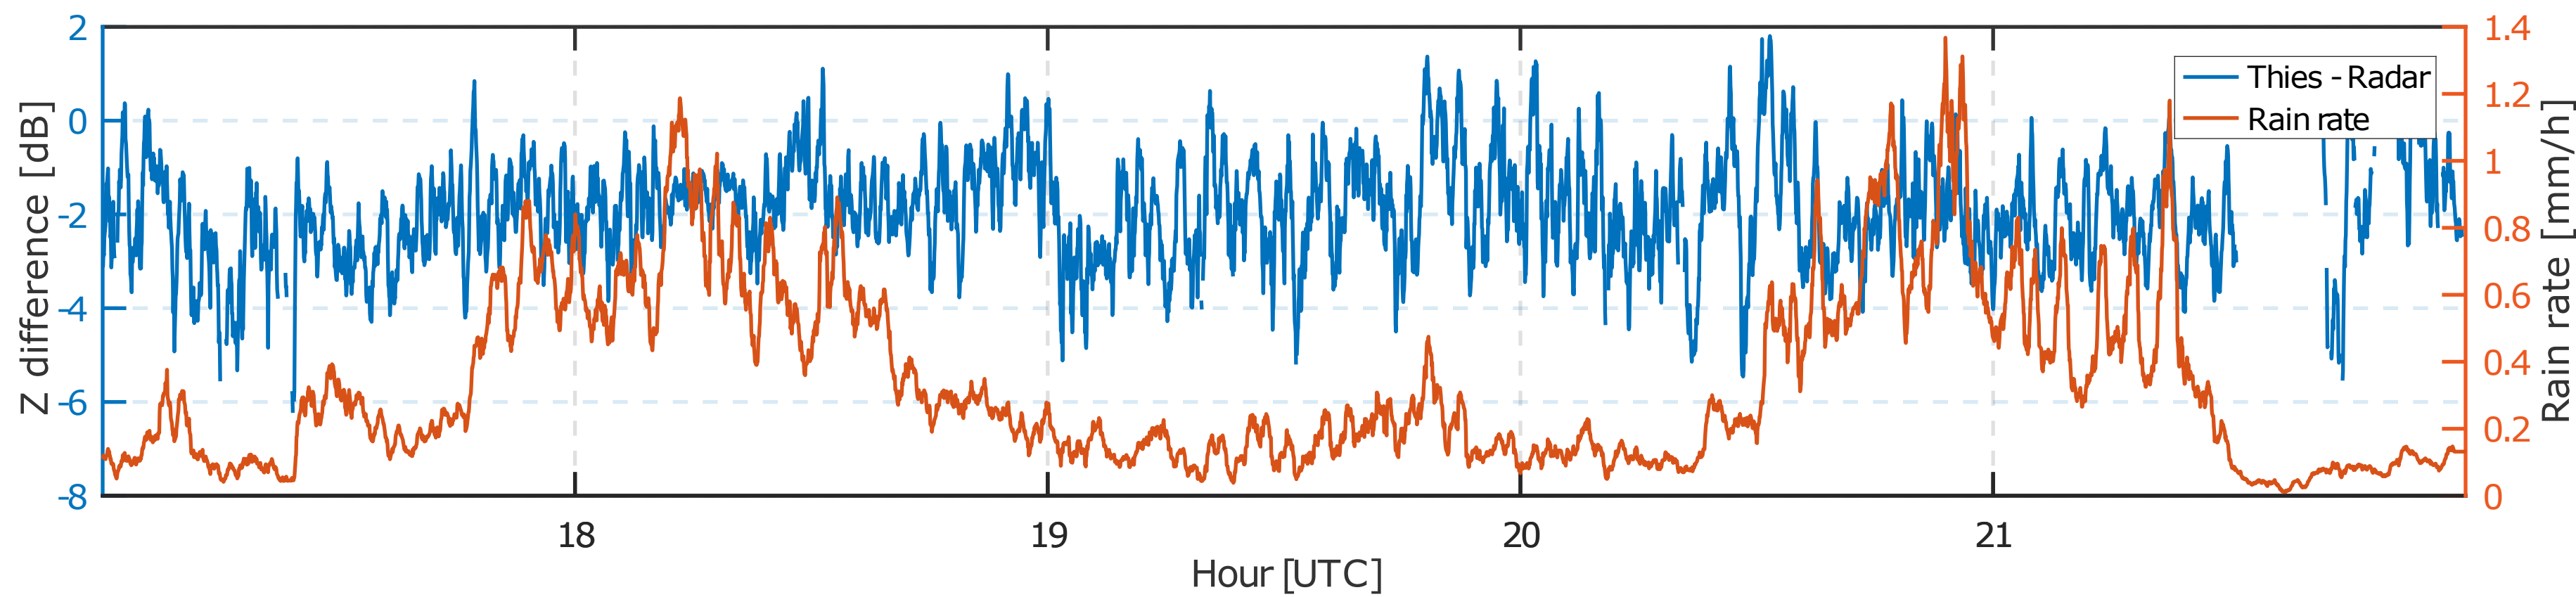

Supplement: Supplementary file 14 [file amt-2020-133-supplement.zip]

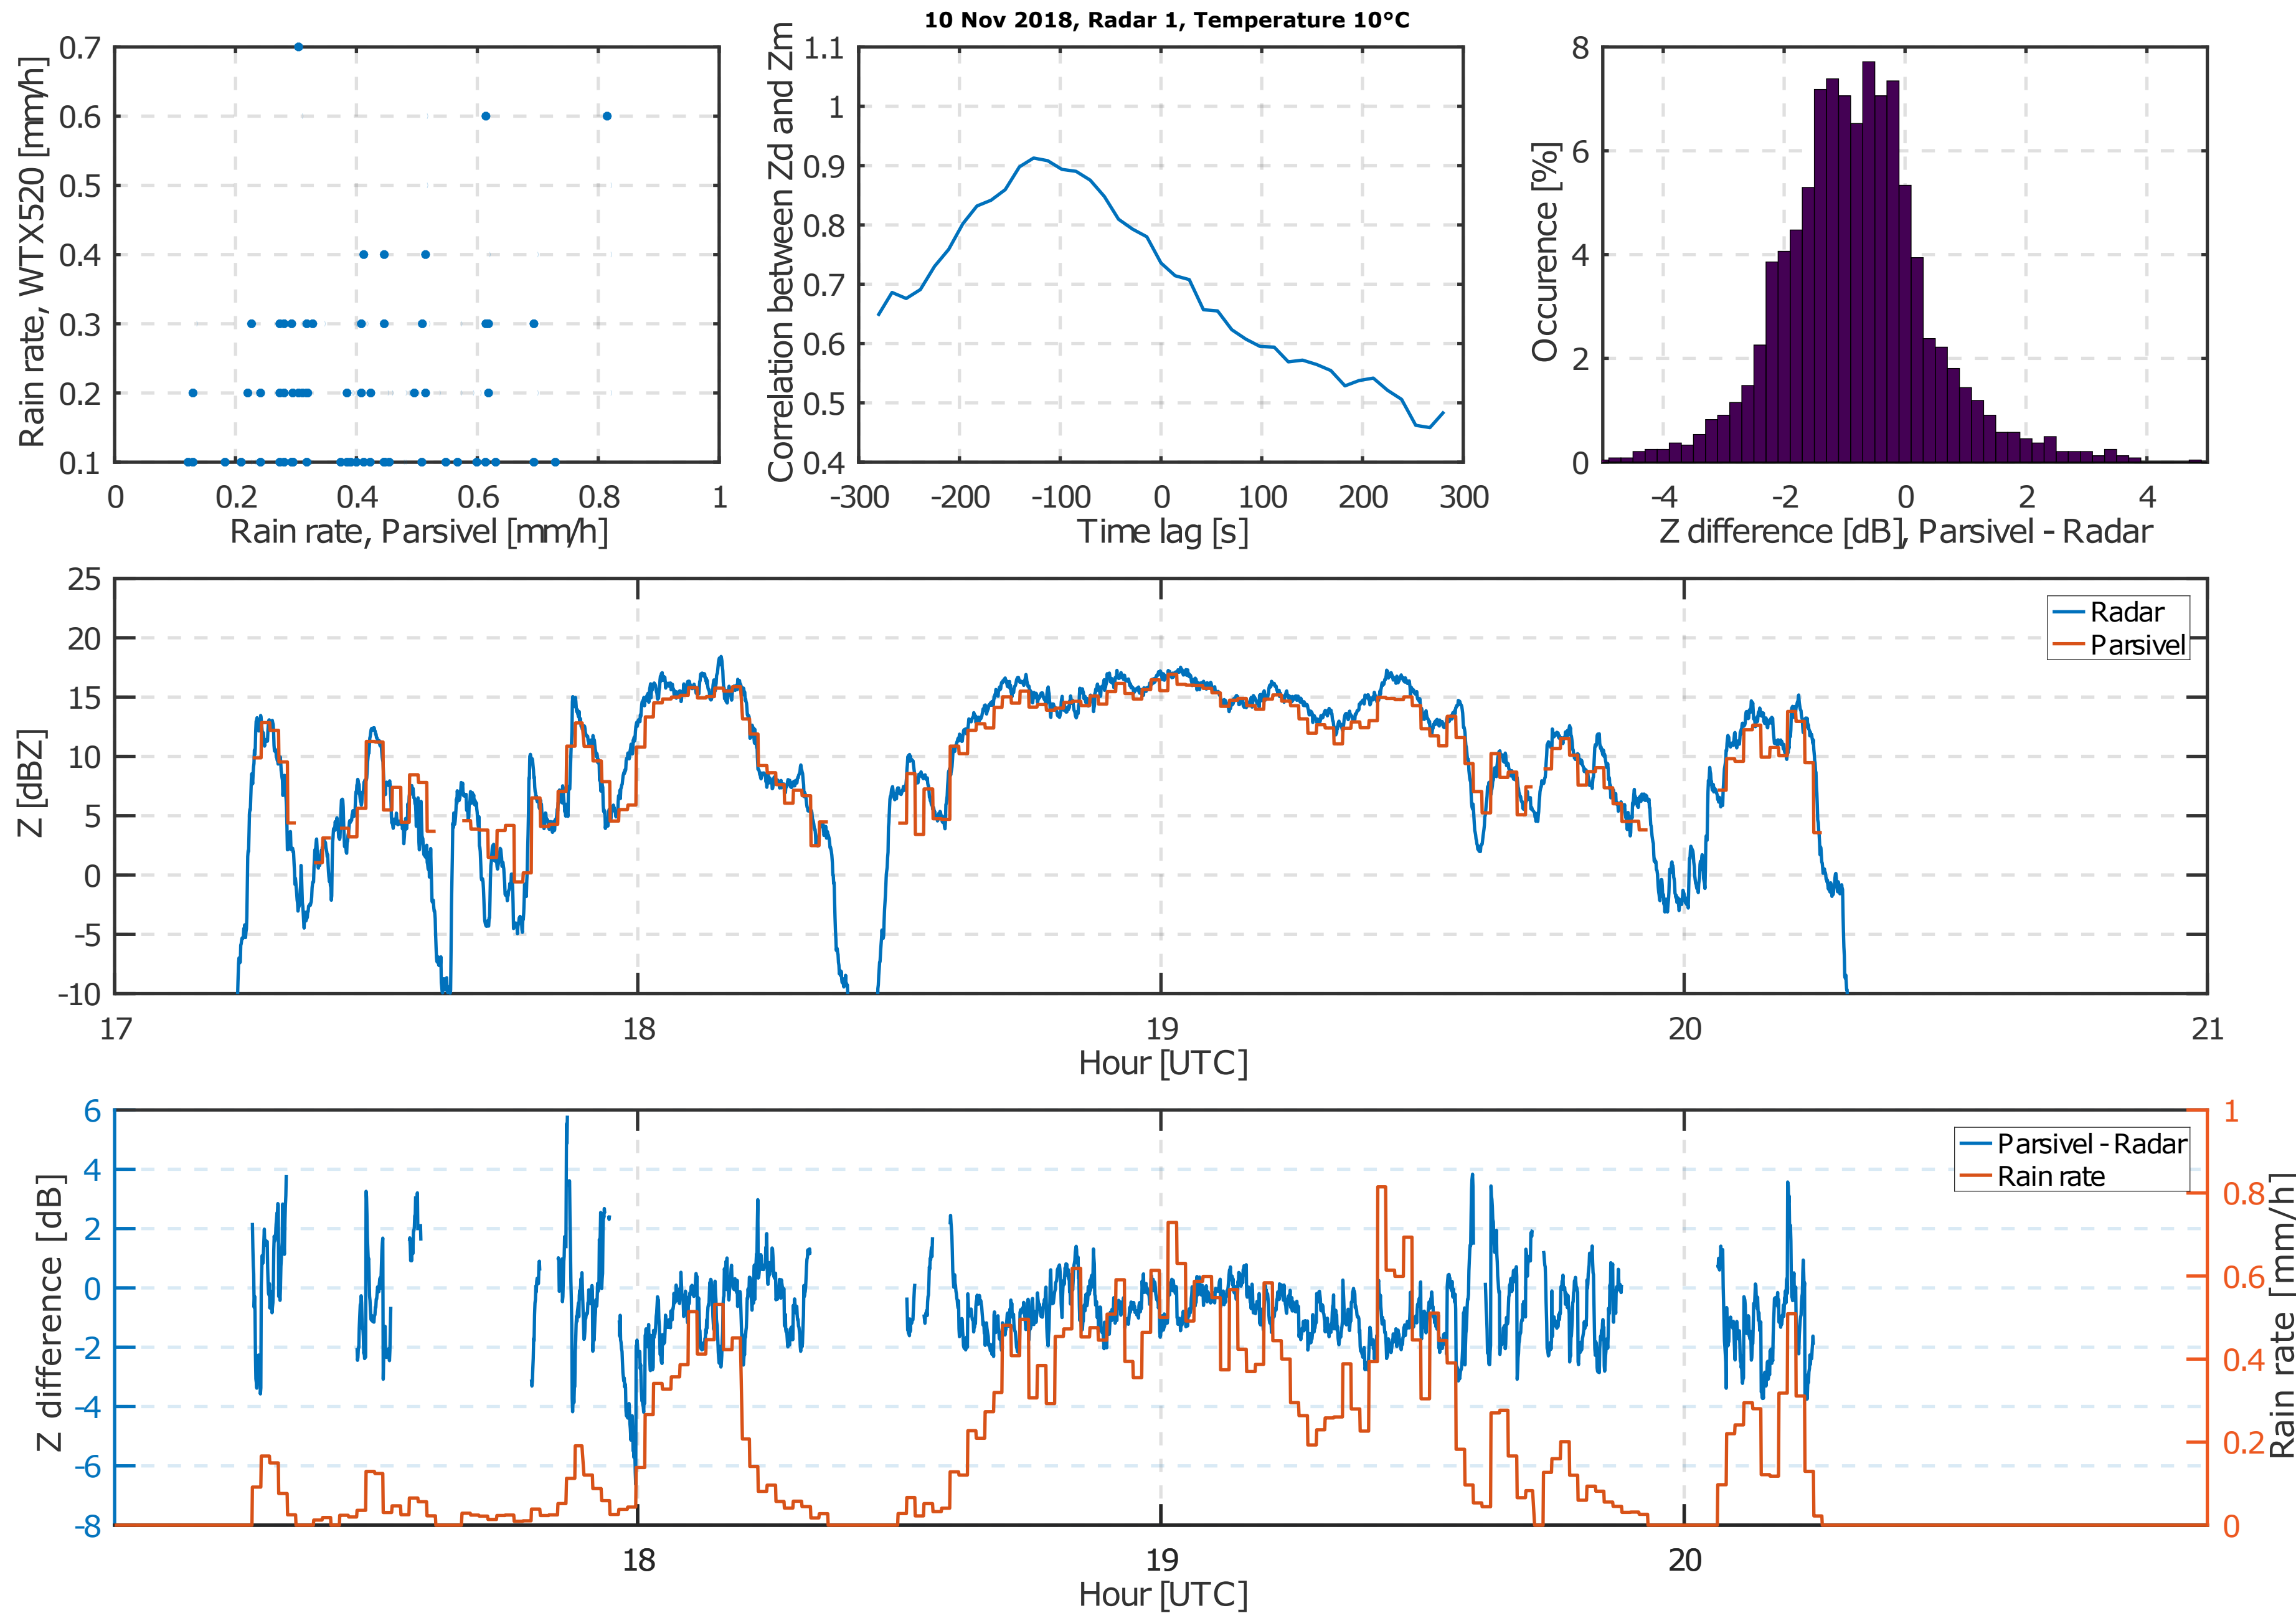

Supplement: Supplementary file 15 [file amt-2020-133-supplement.zip]

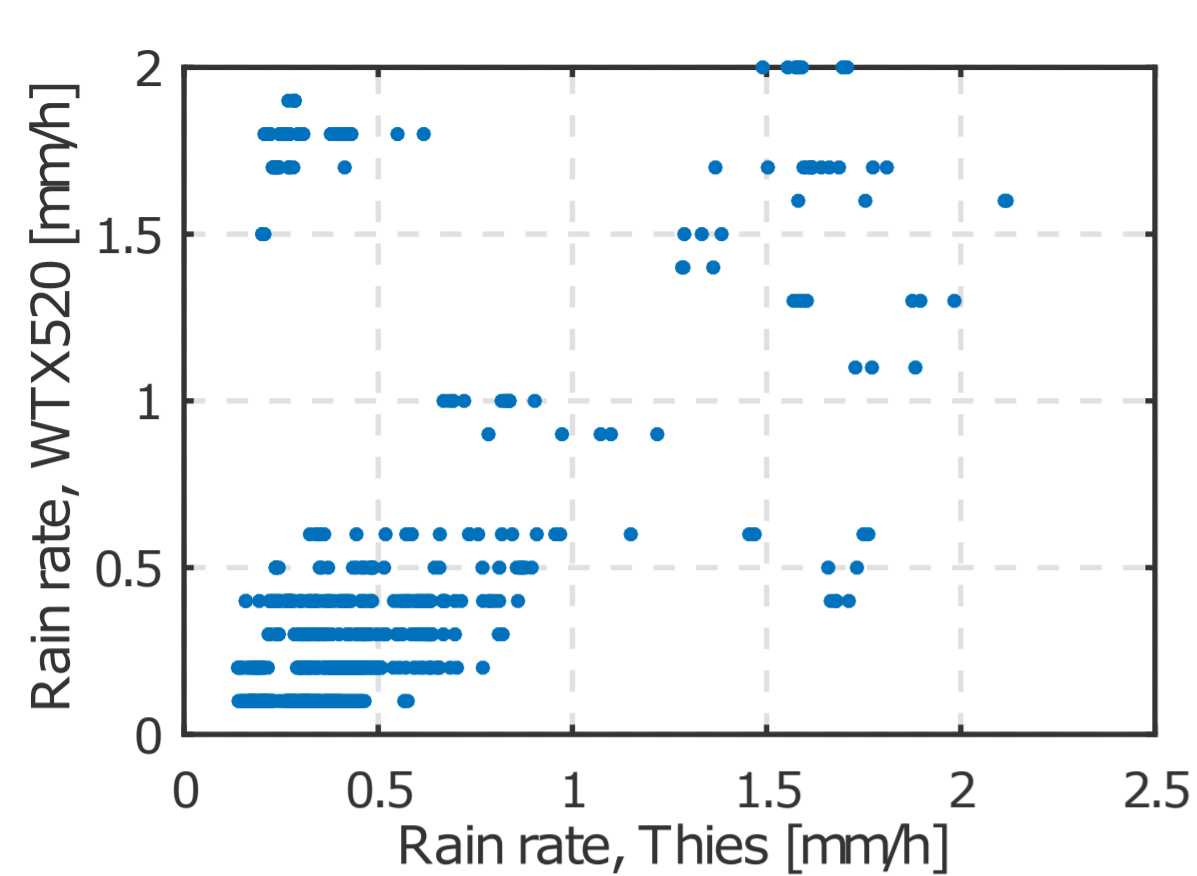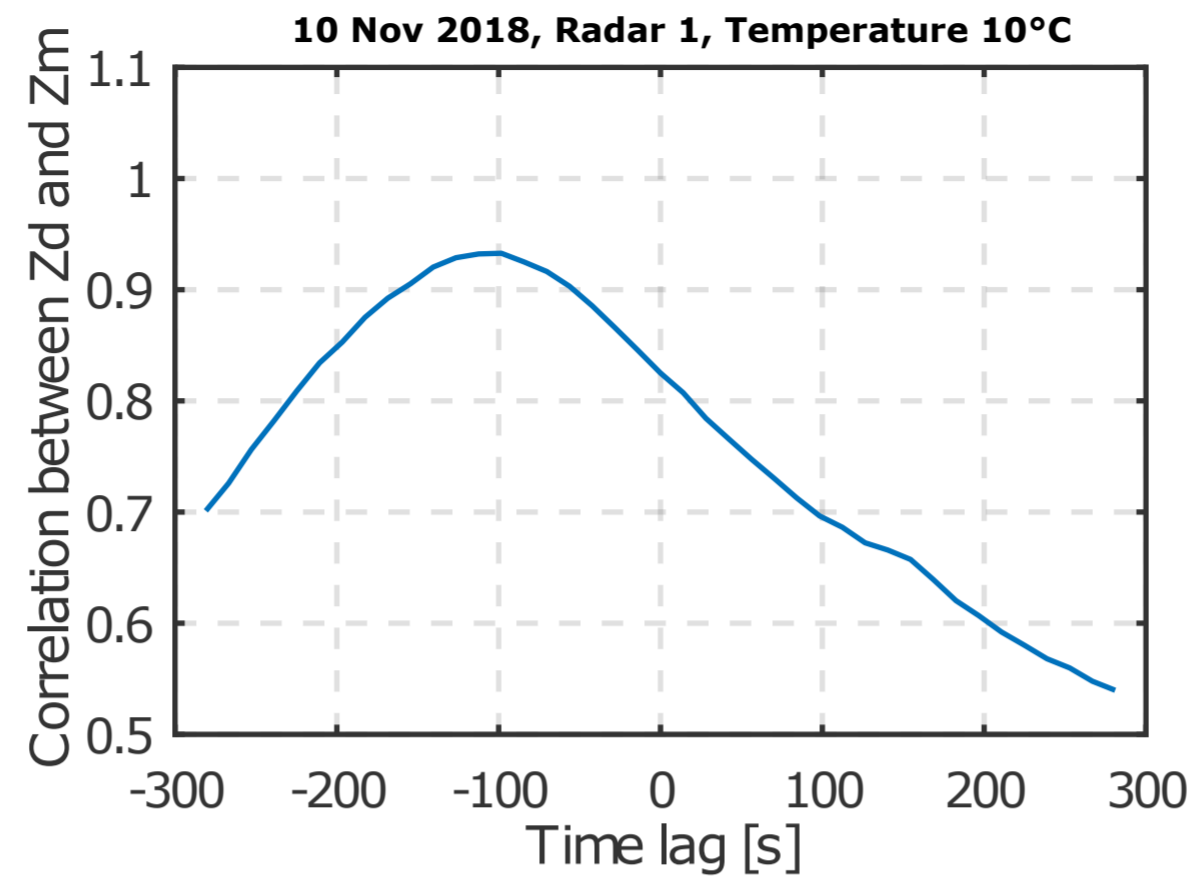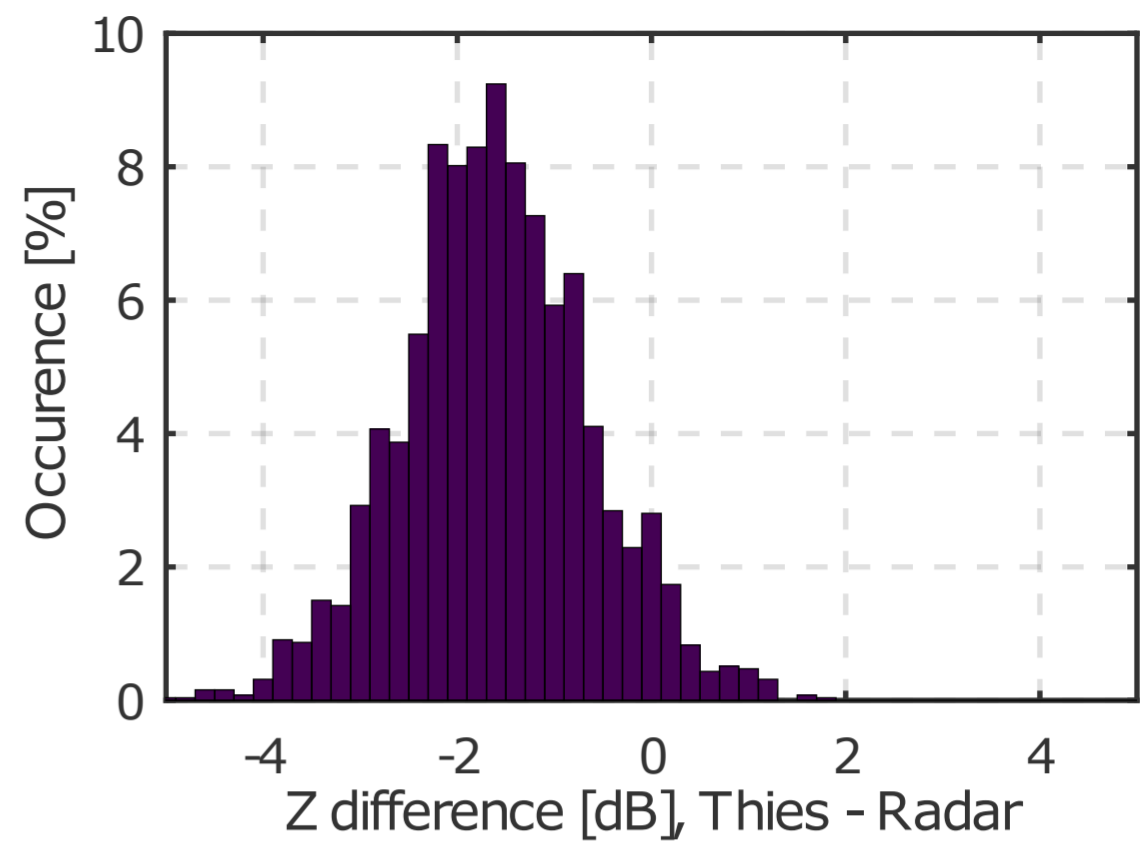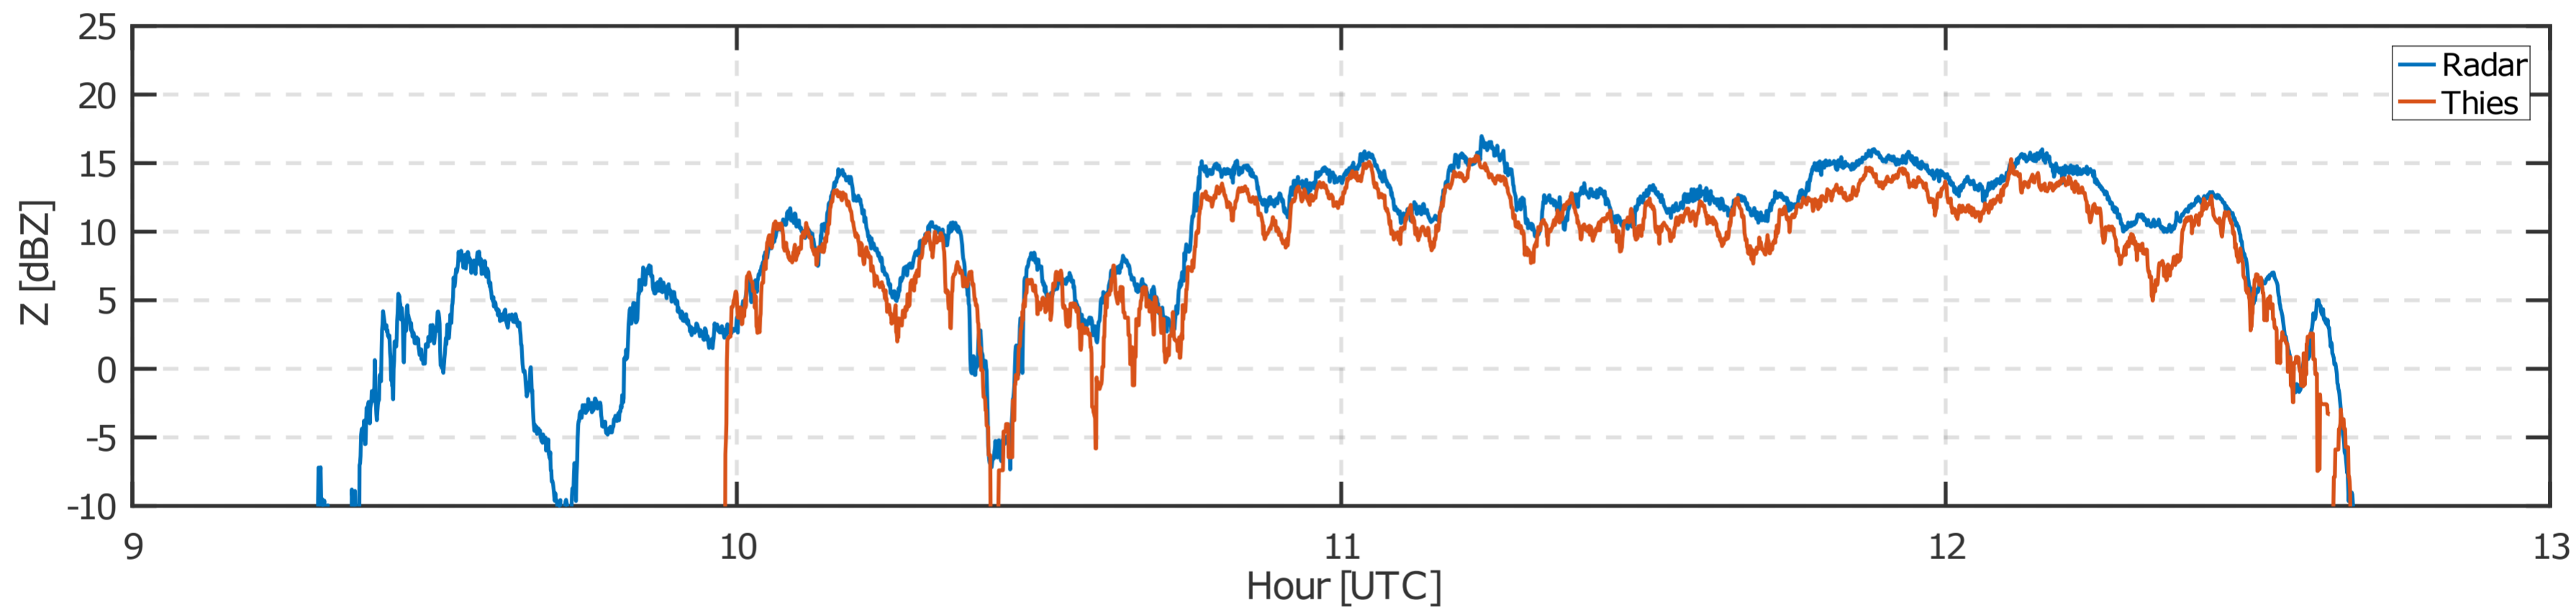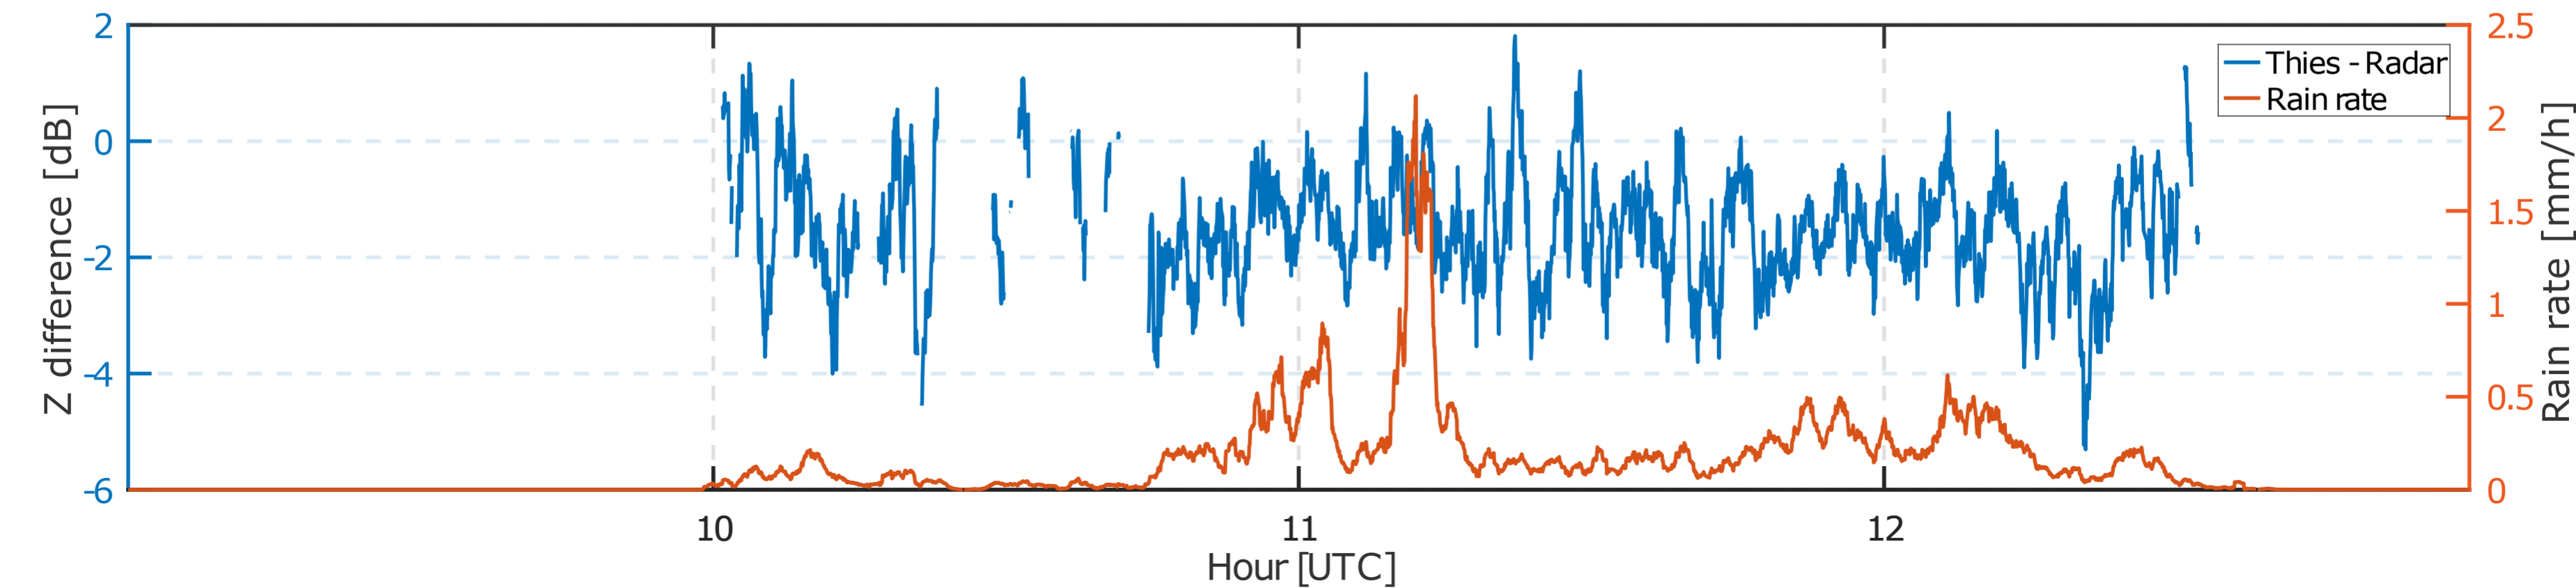

Supplement: Supplementary file 16 [file amt-2020-133-supplement.zip]

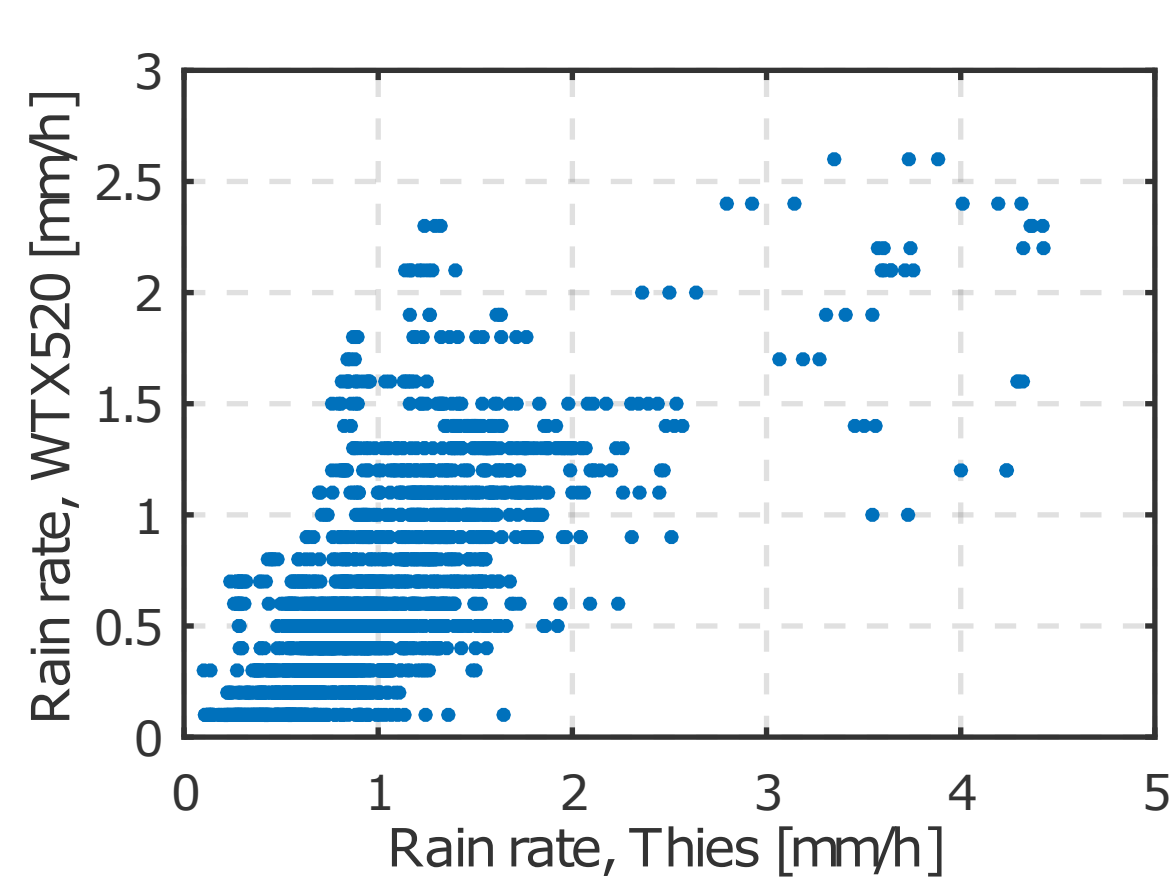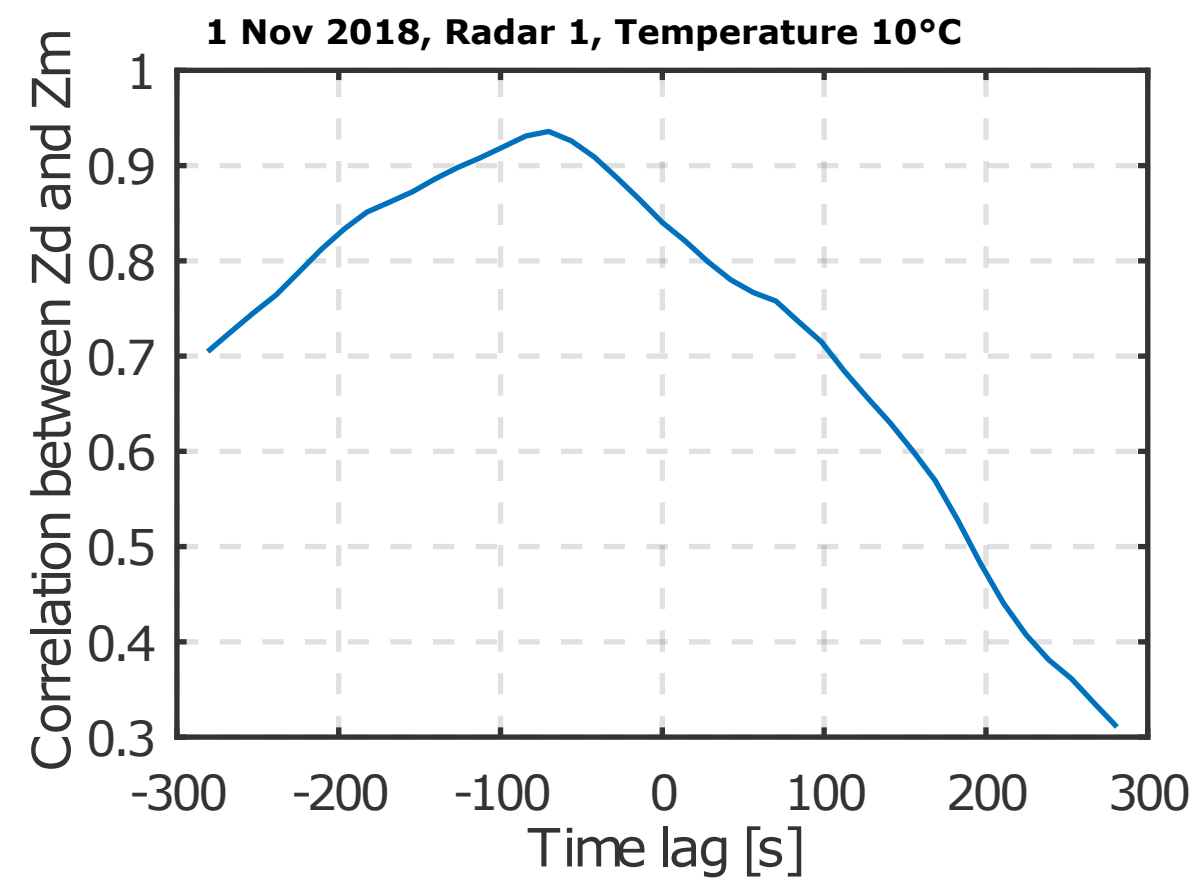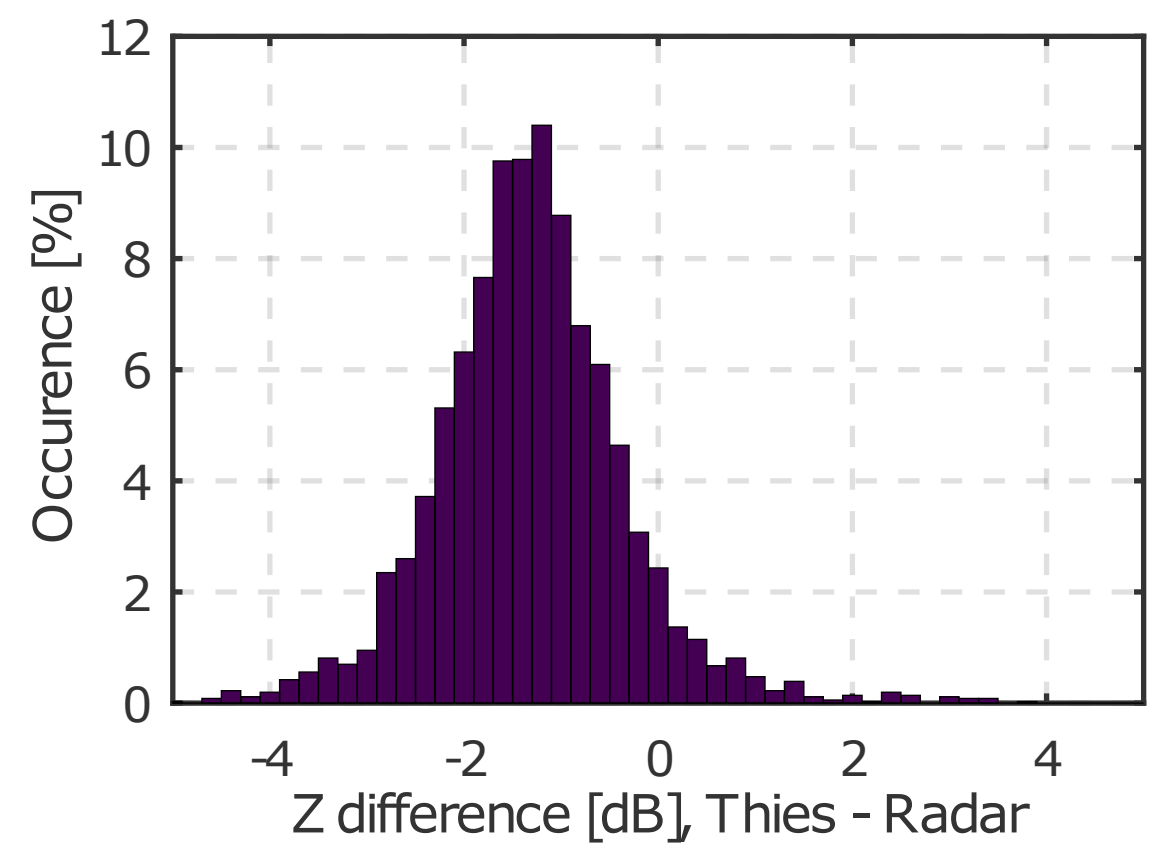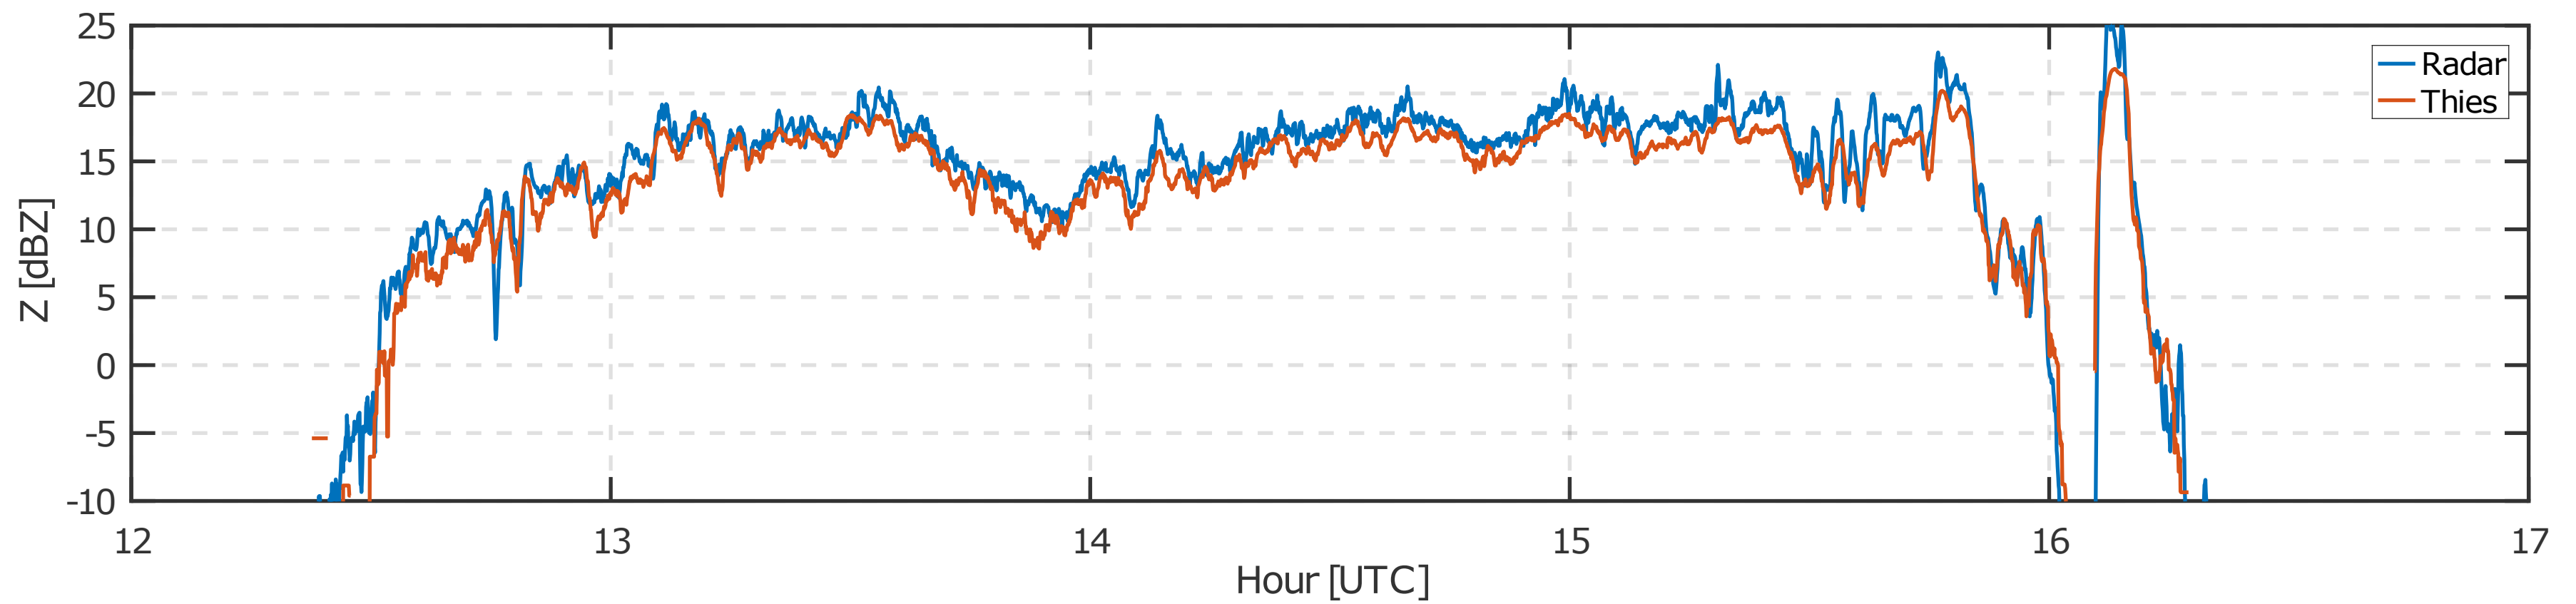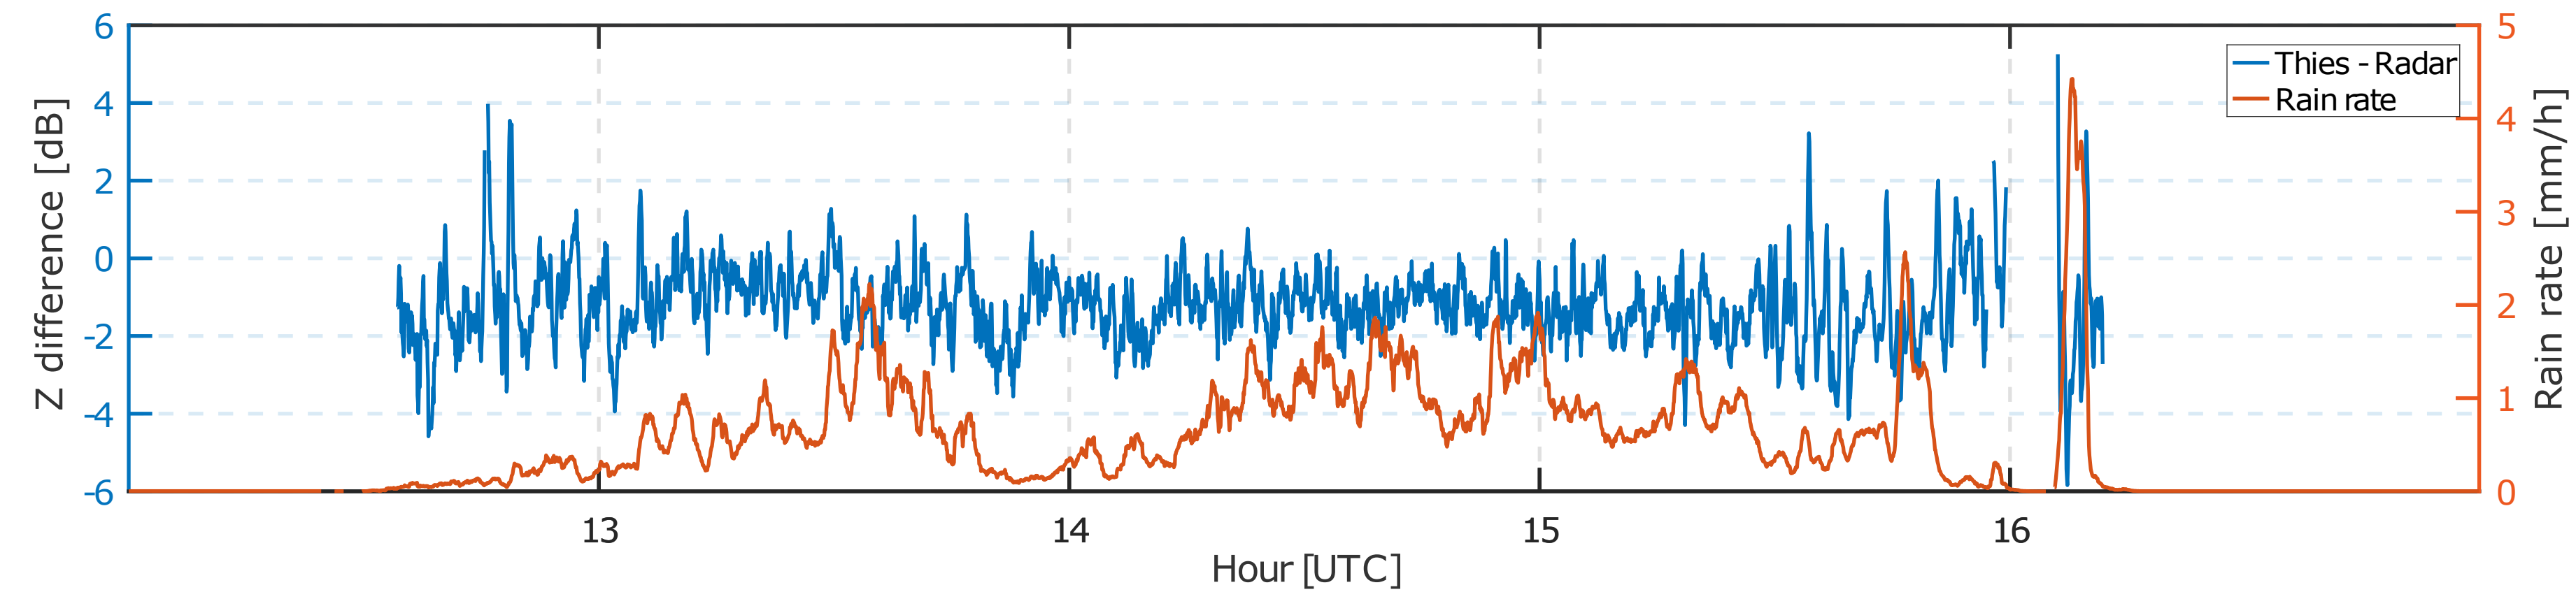

Supplement: Supplementary file 17 [file amt-2020-133-supplement.zip]

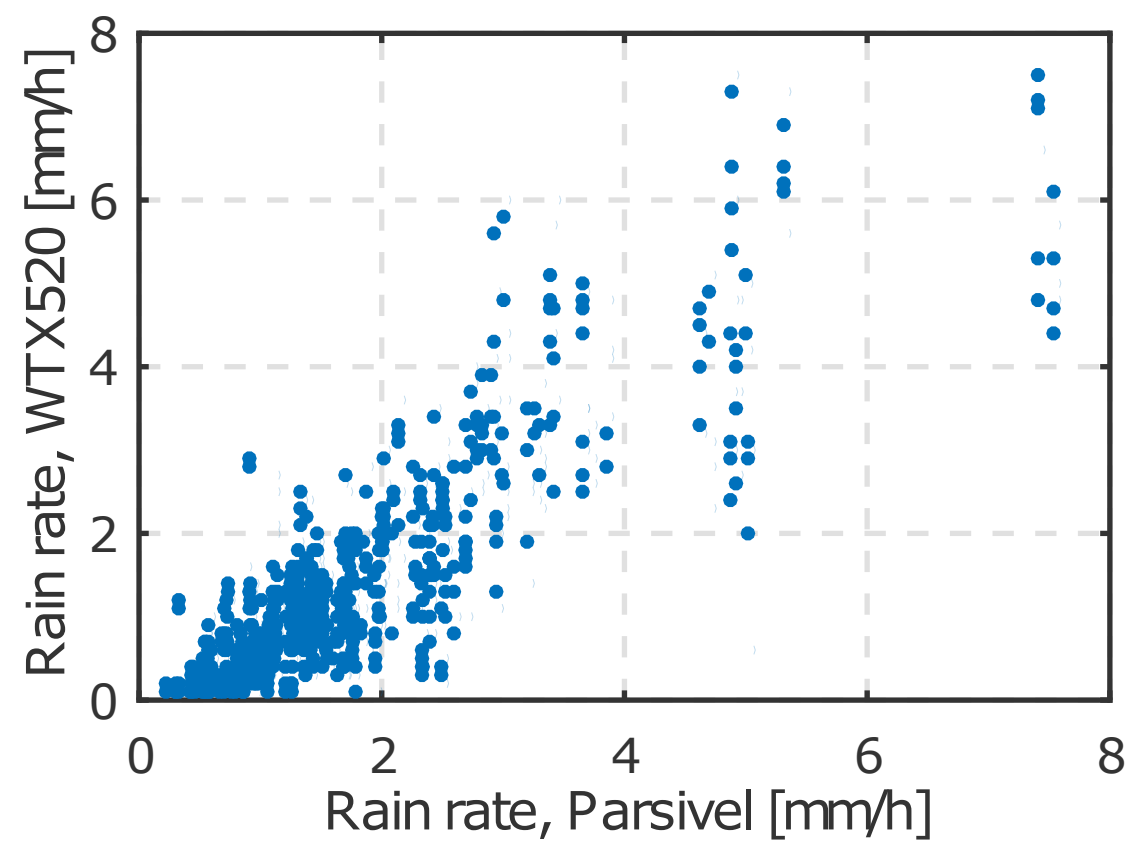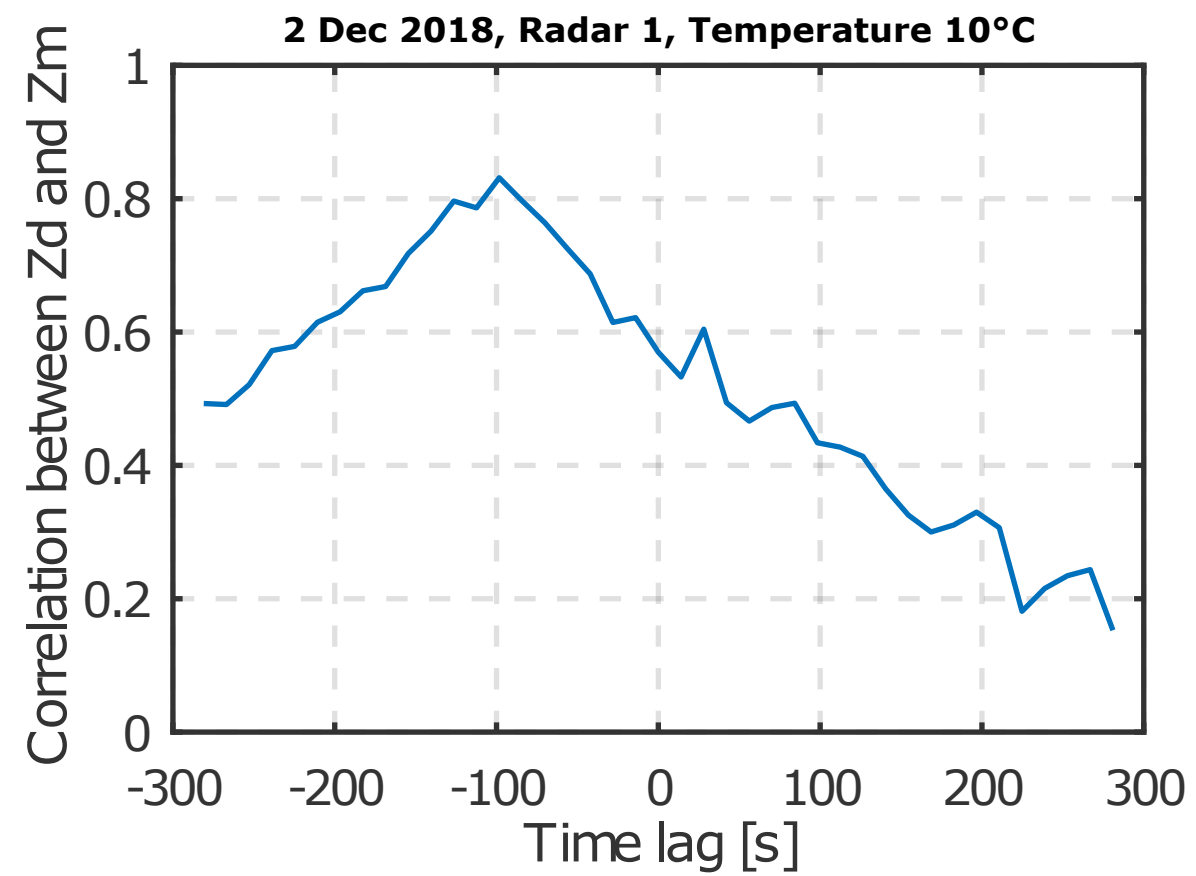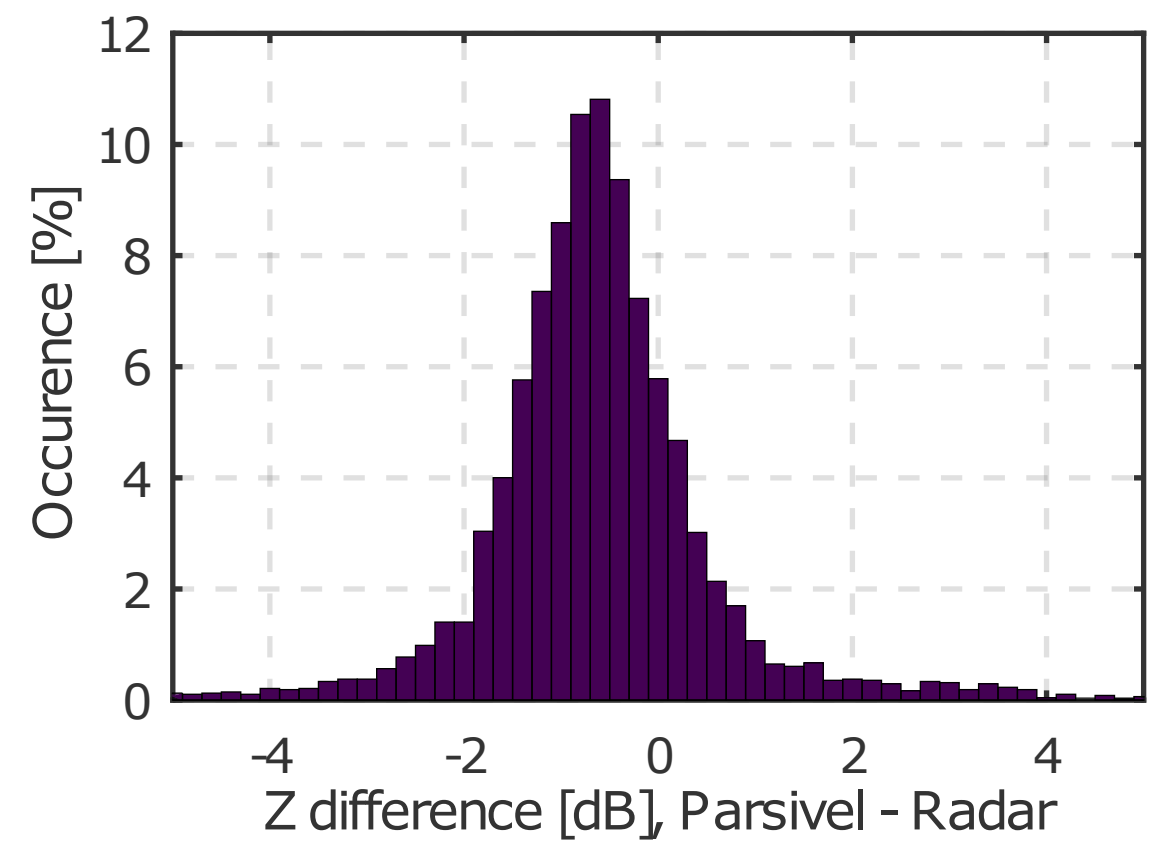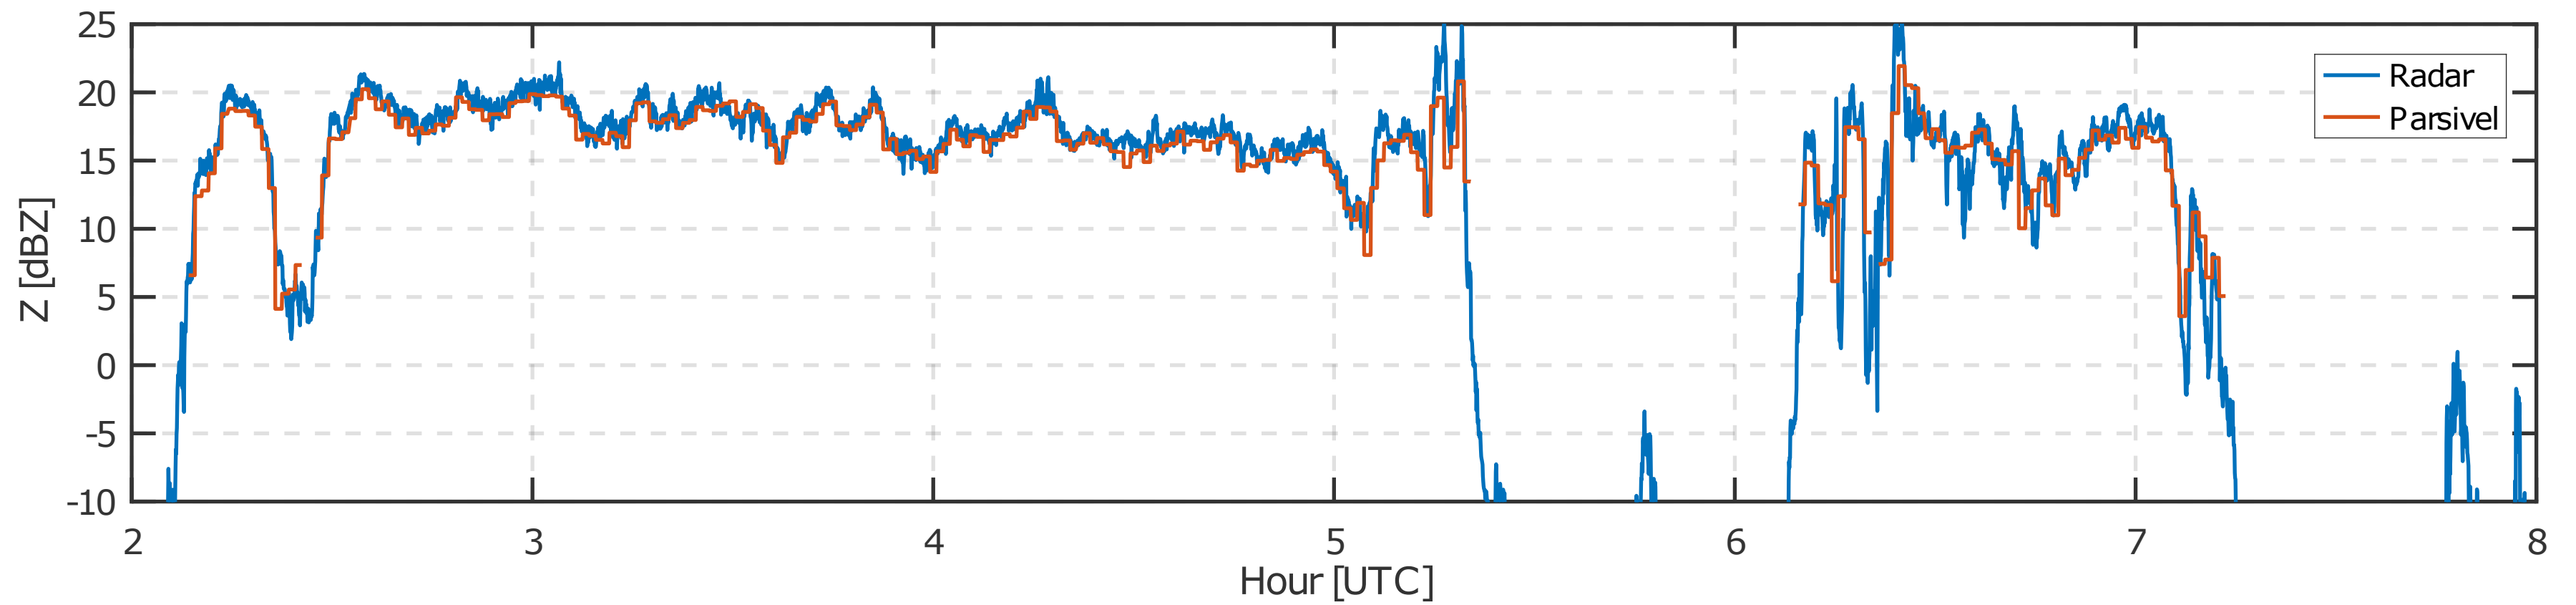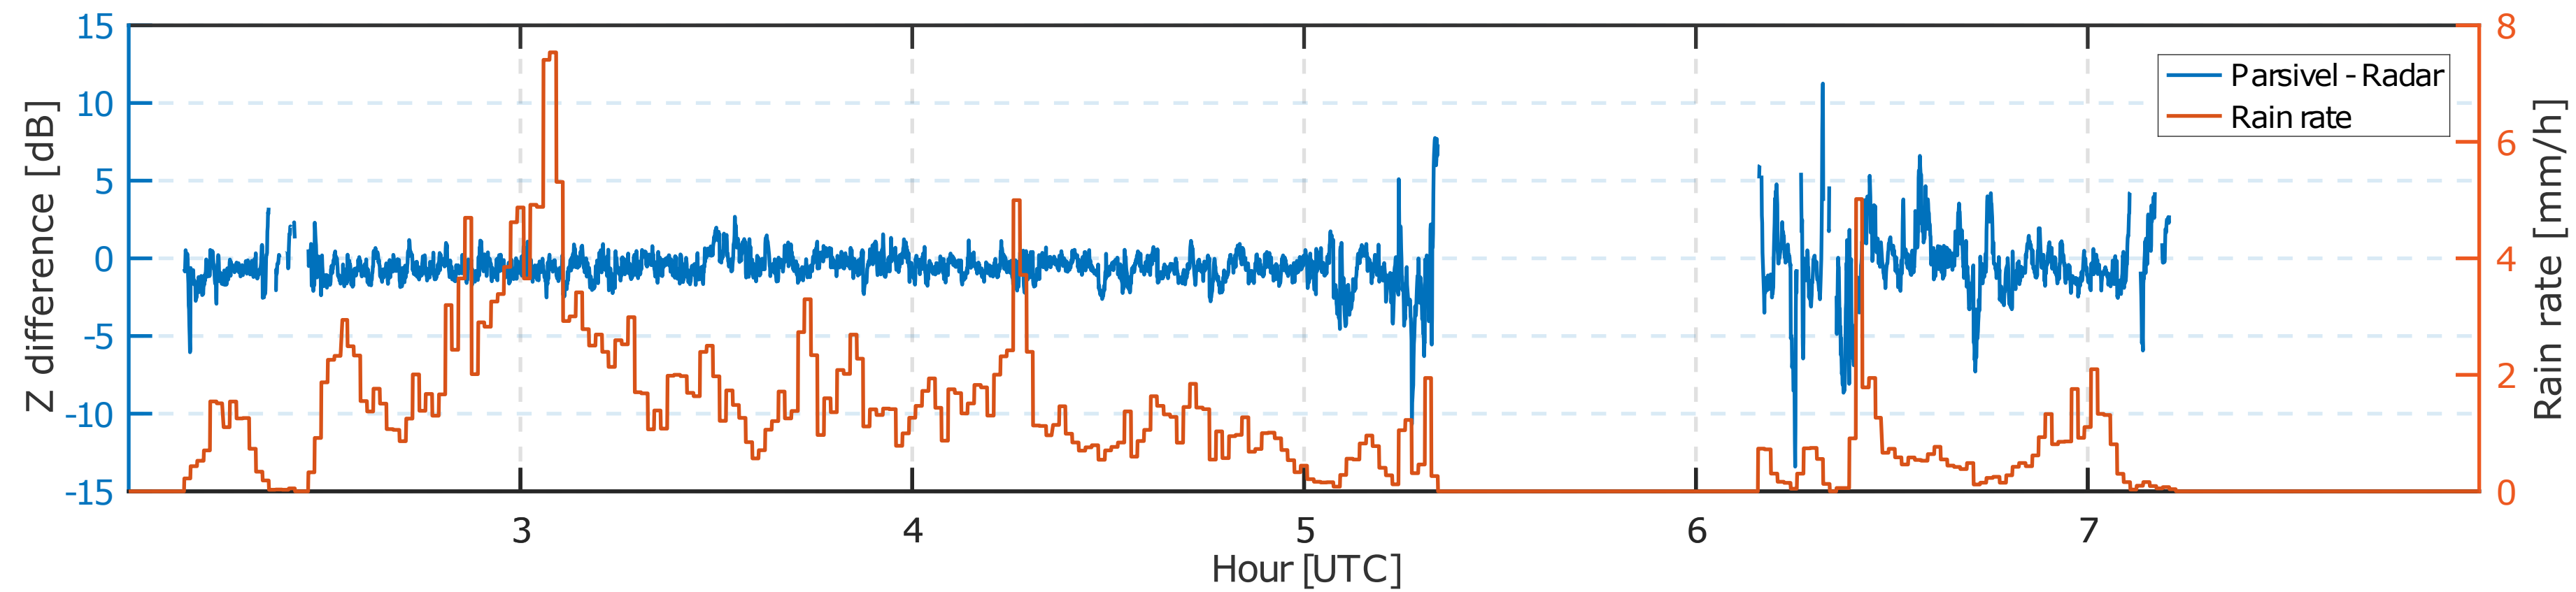

Supplement: Supplementary file 18 [file amt-2020-133-supplement.zip]

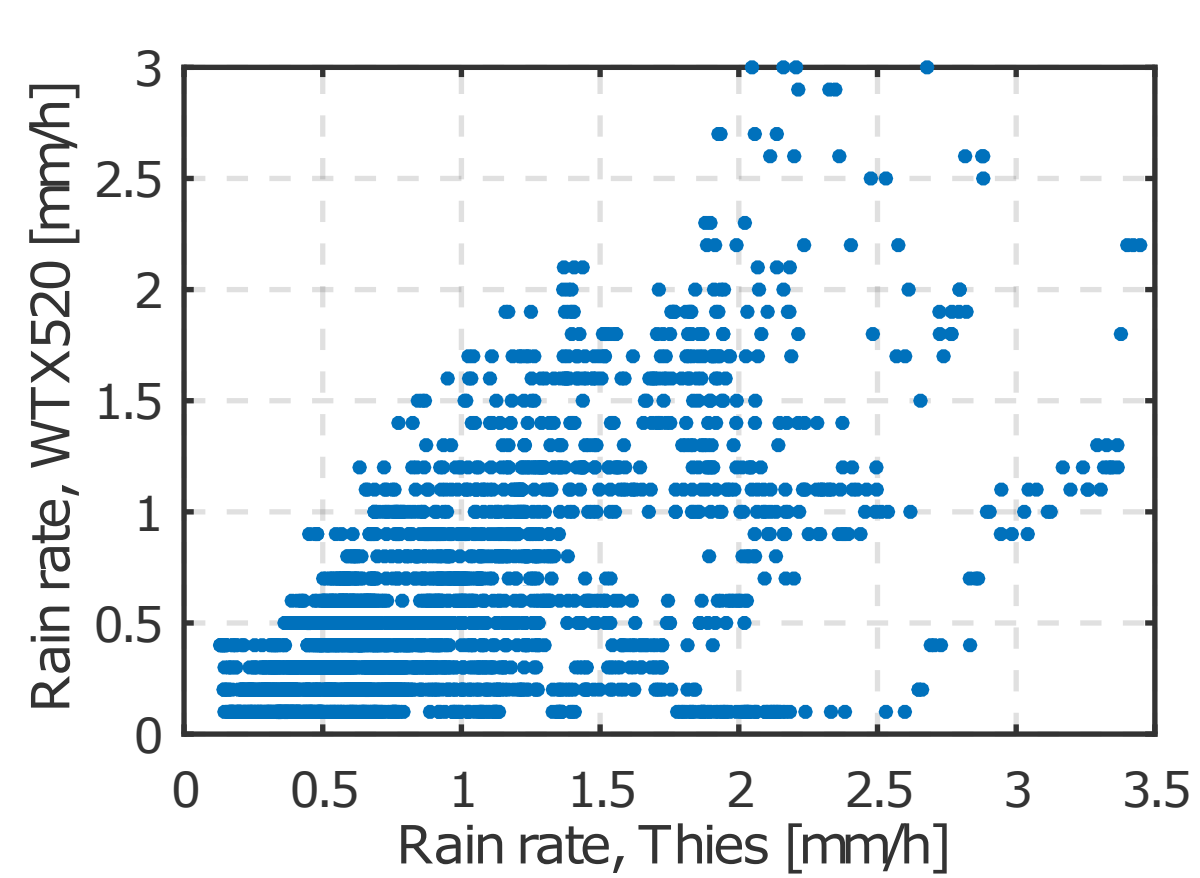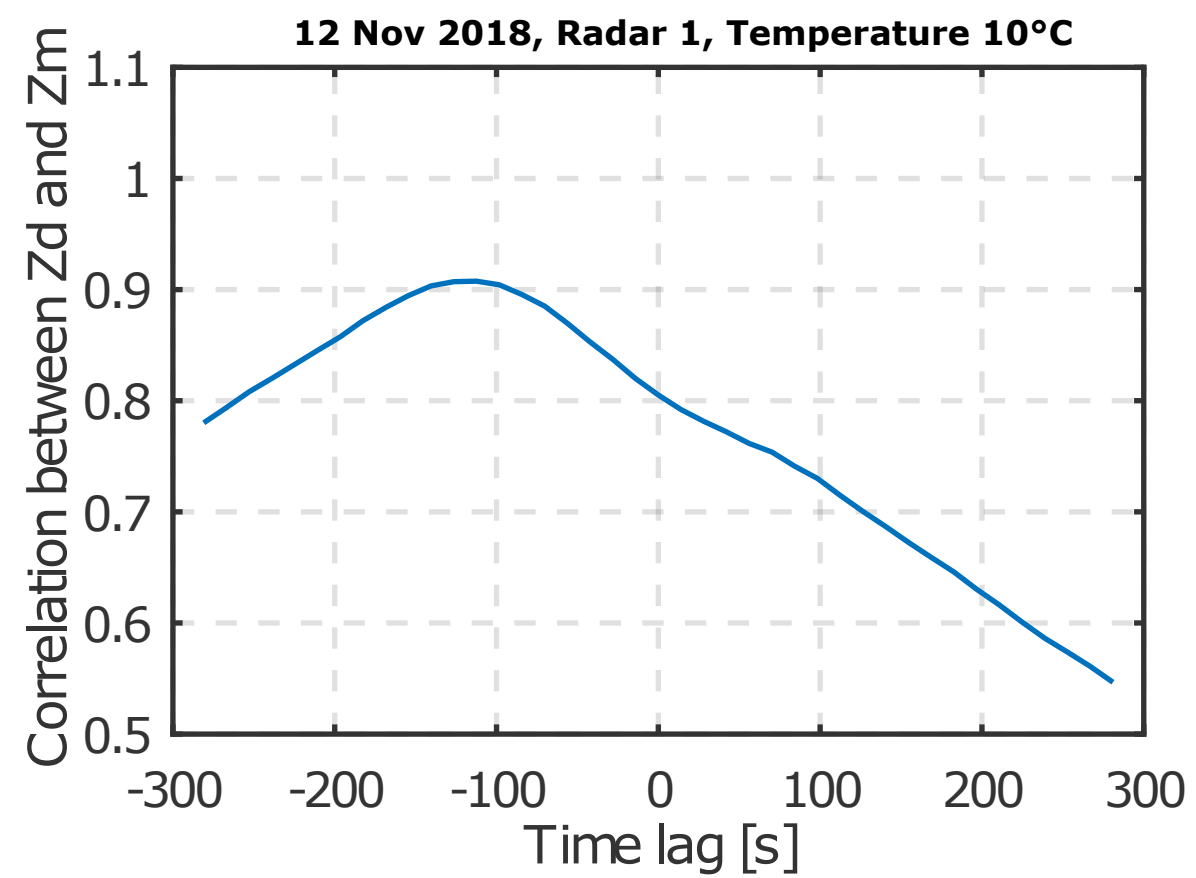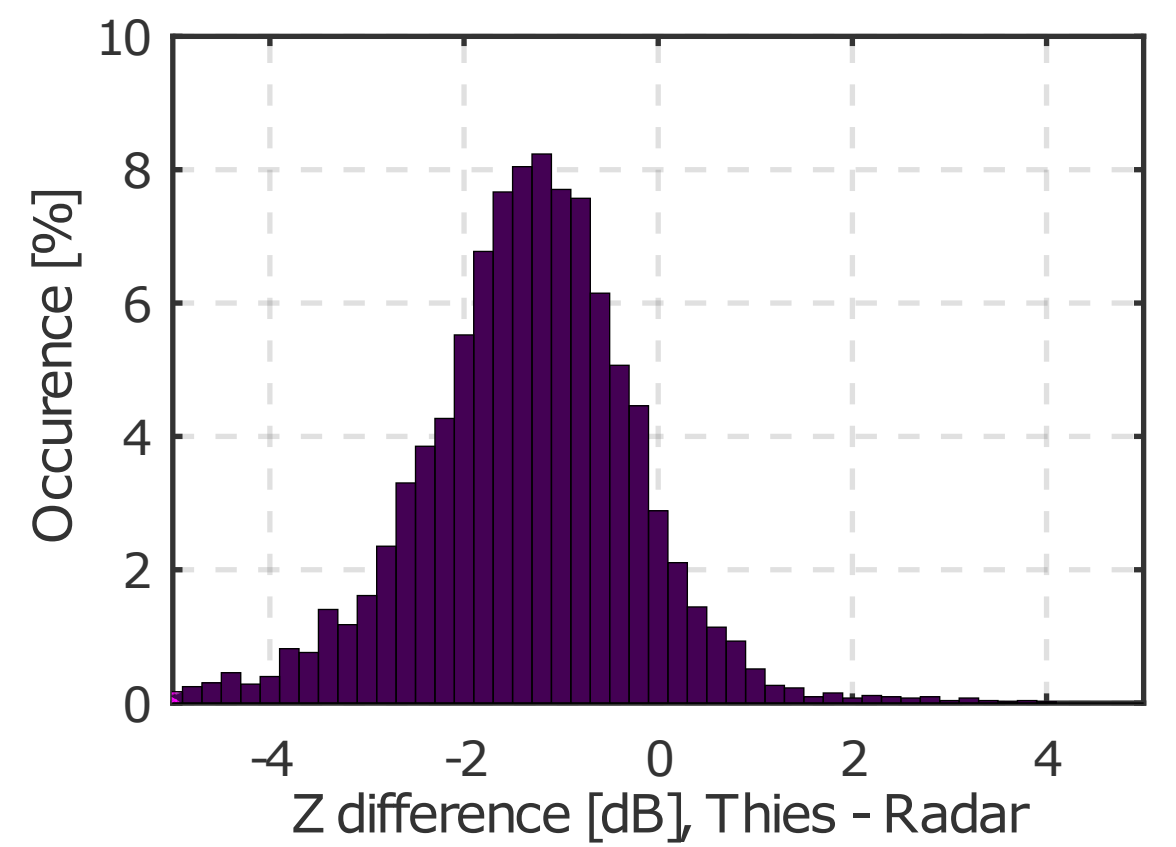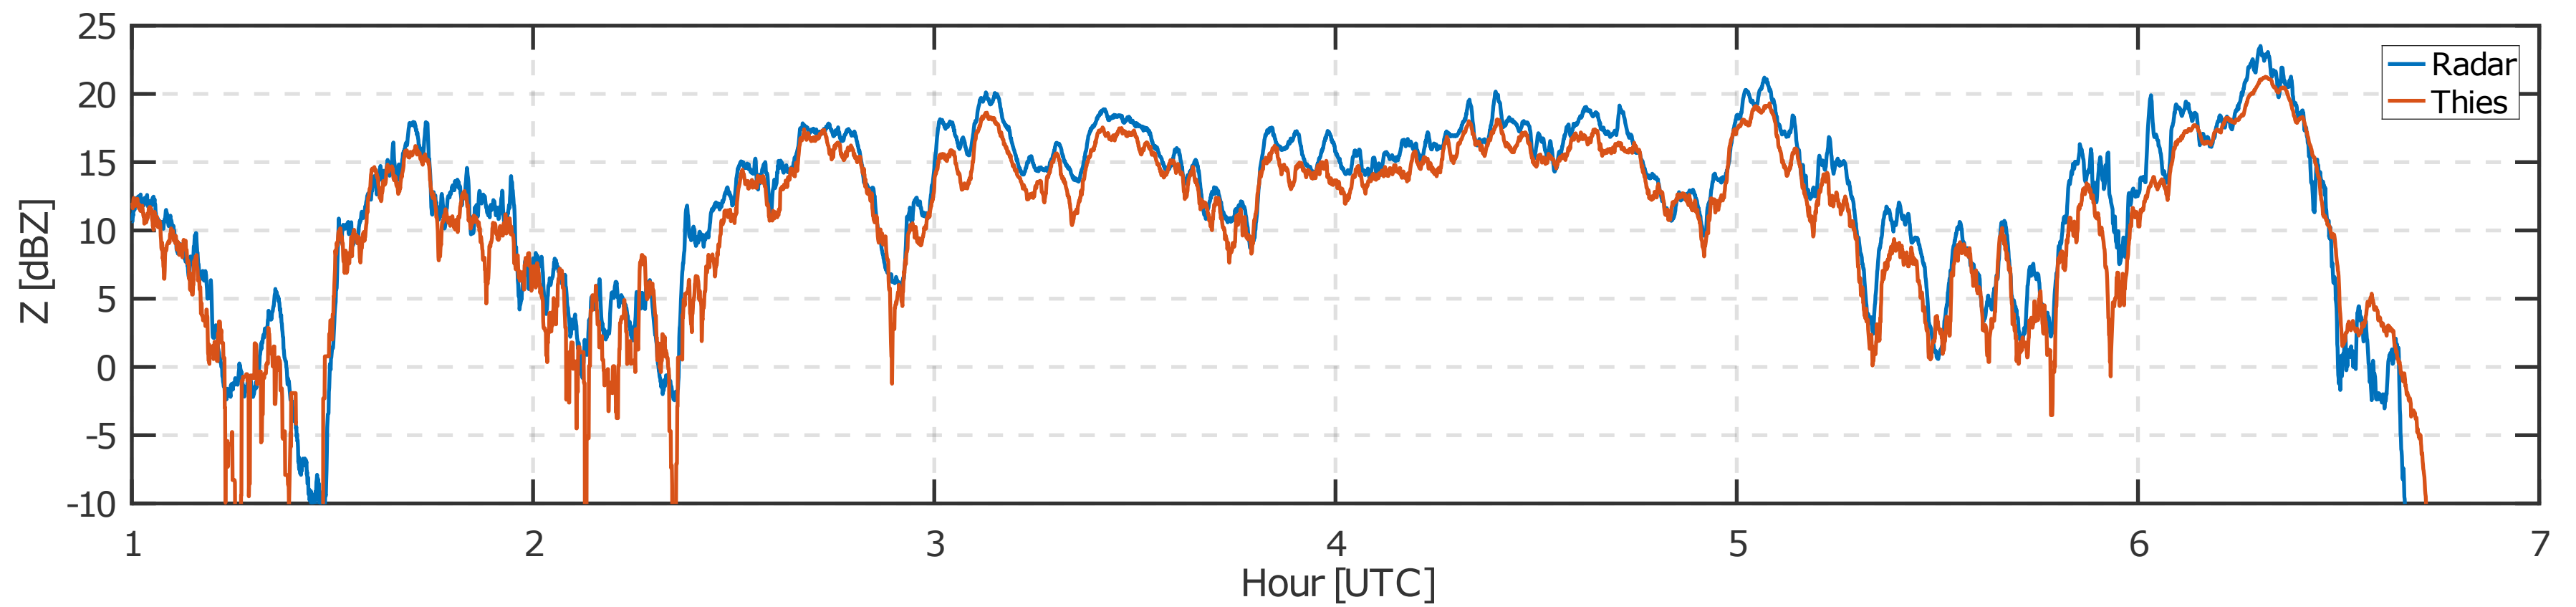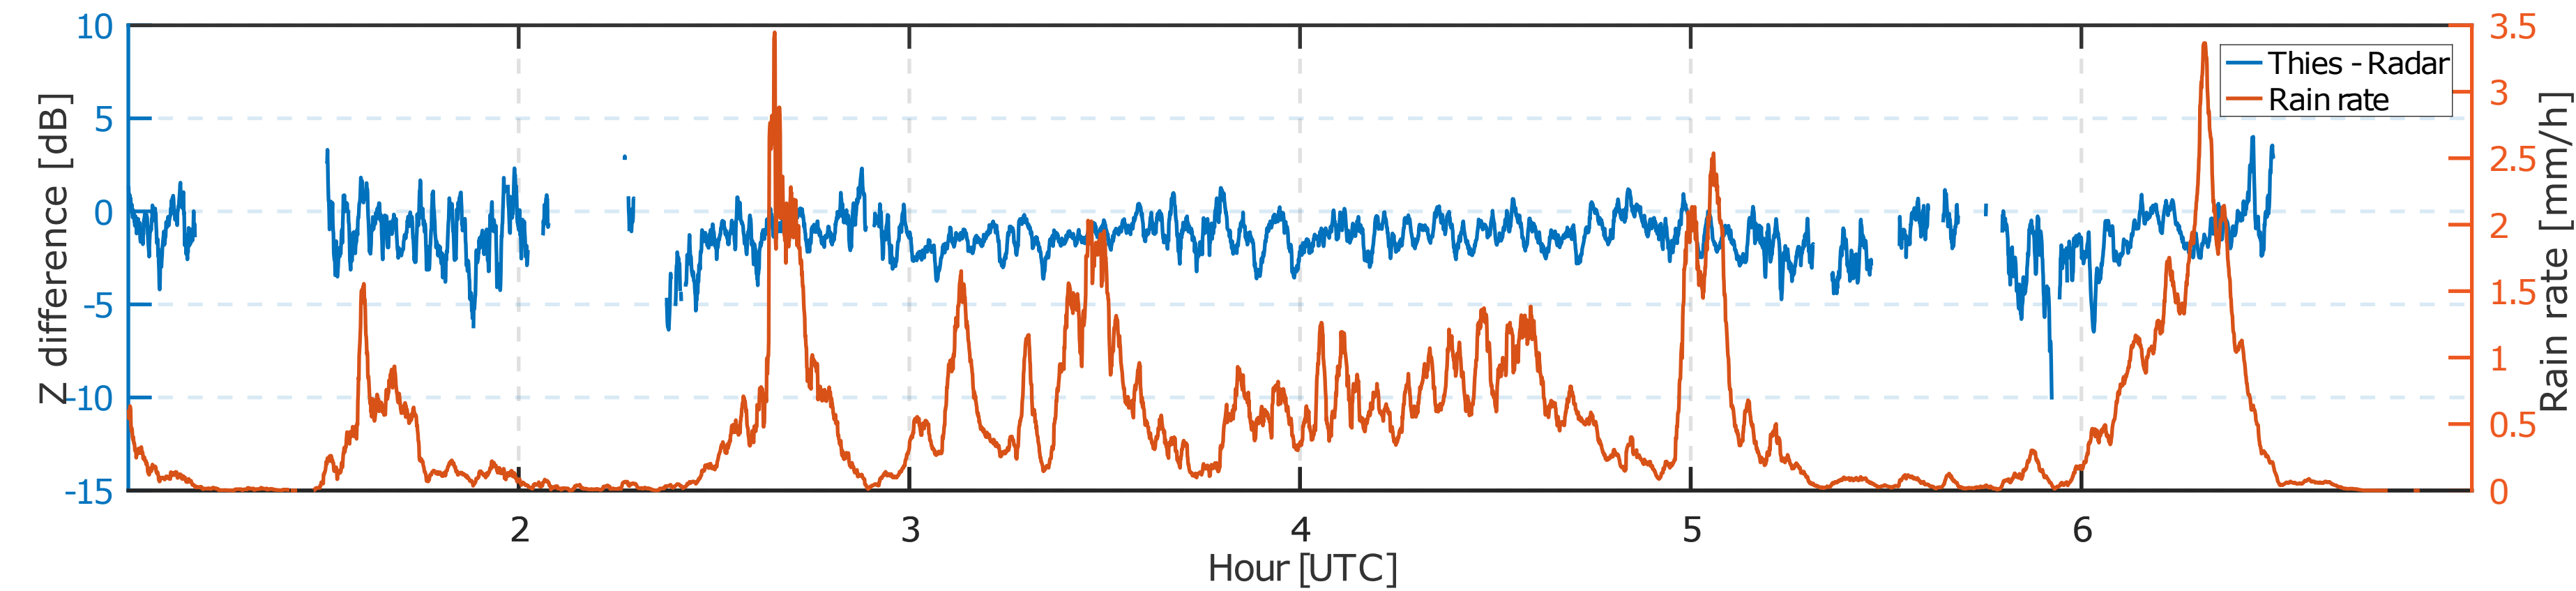

Supplement: Supplementary file 19 [file amt-2020-133-supplement.zip]

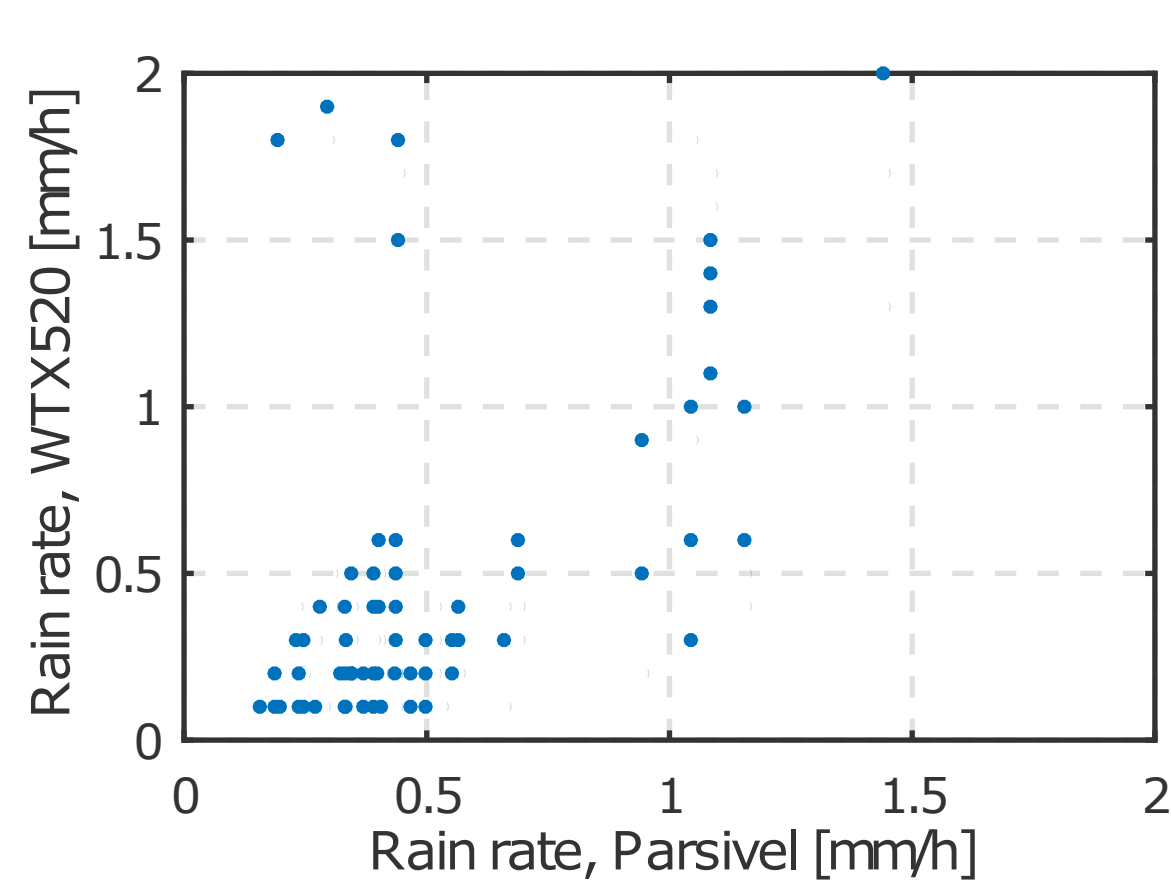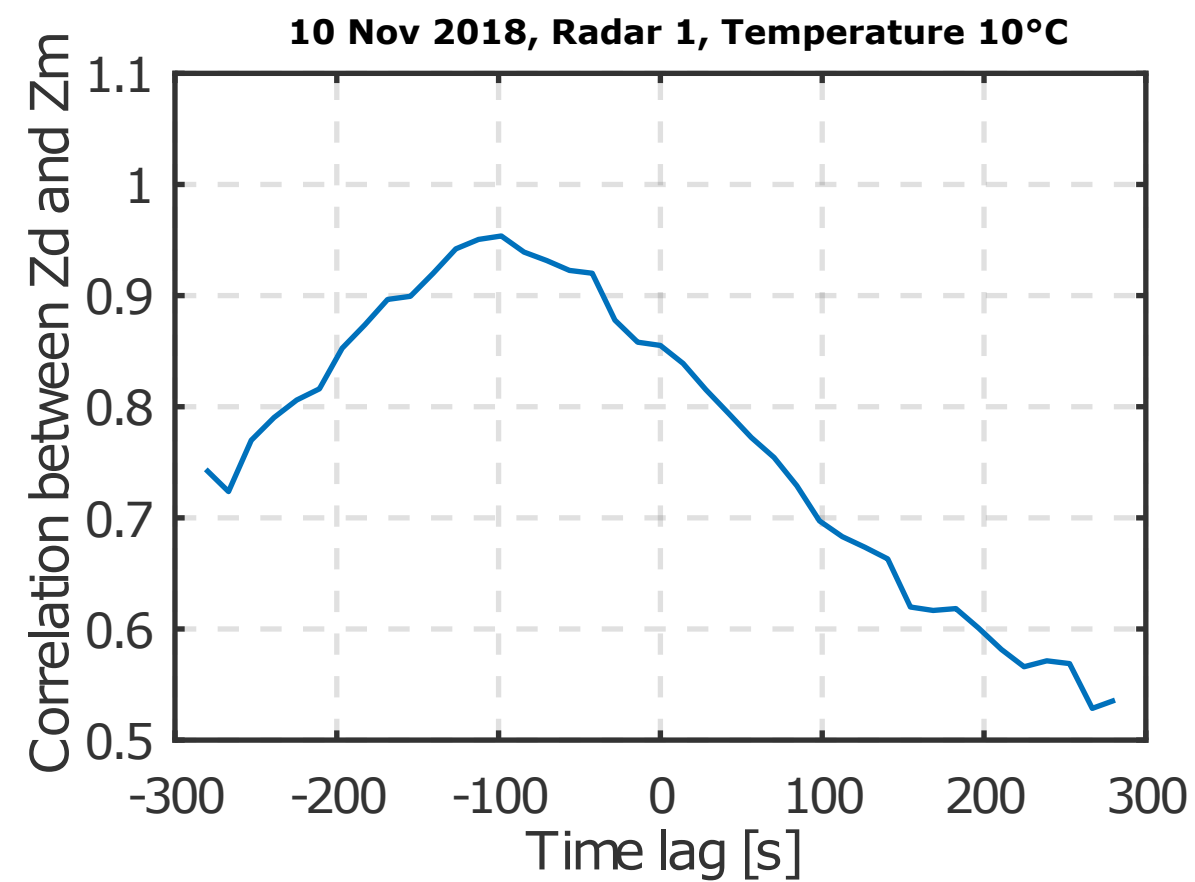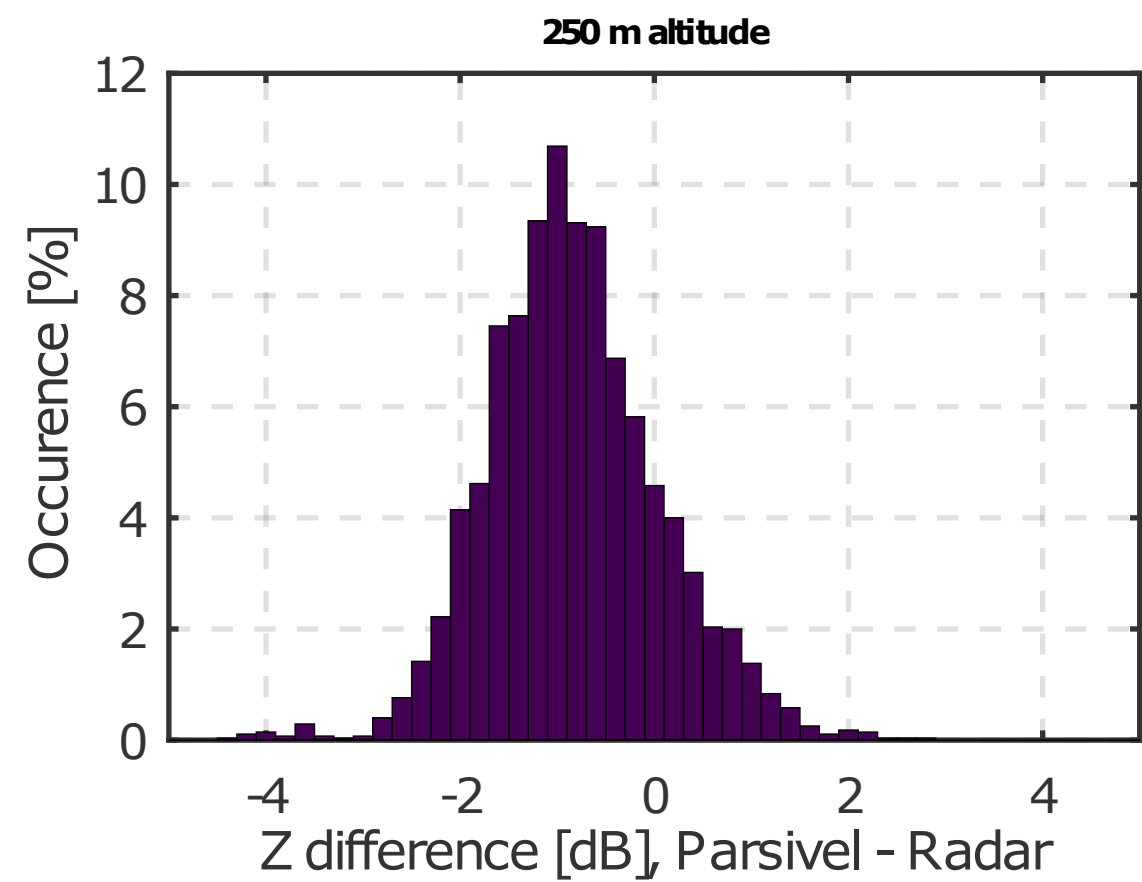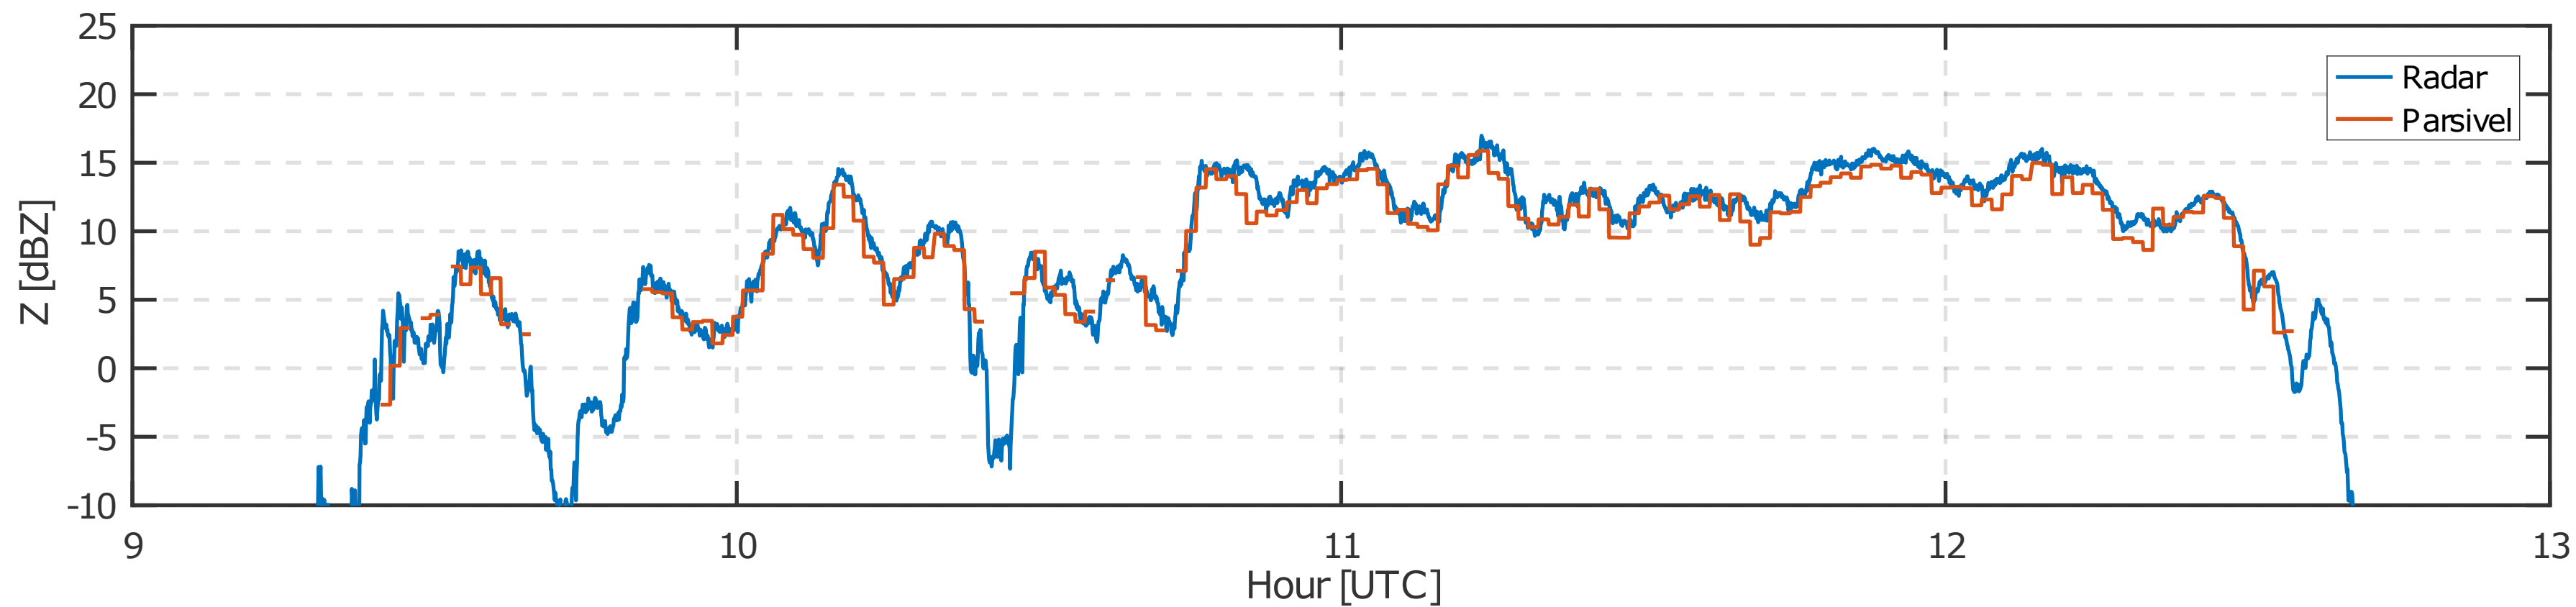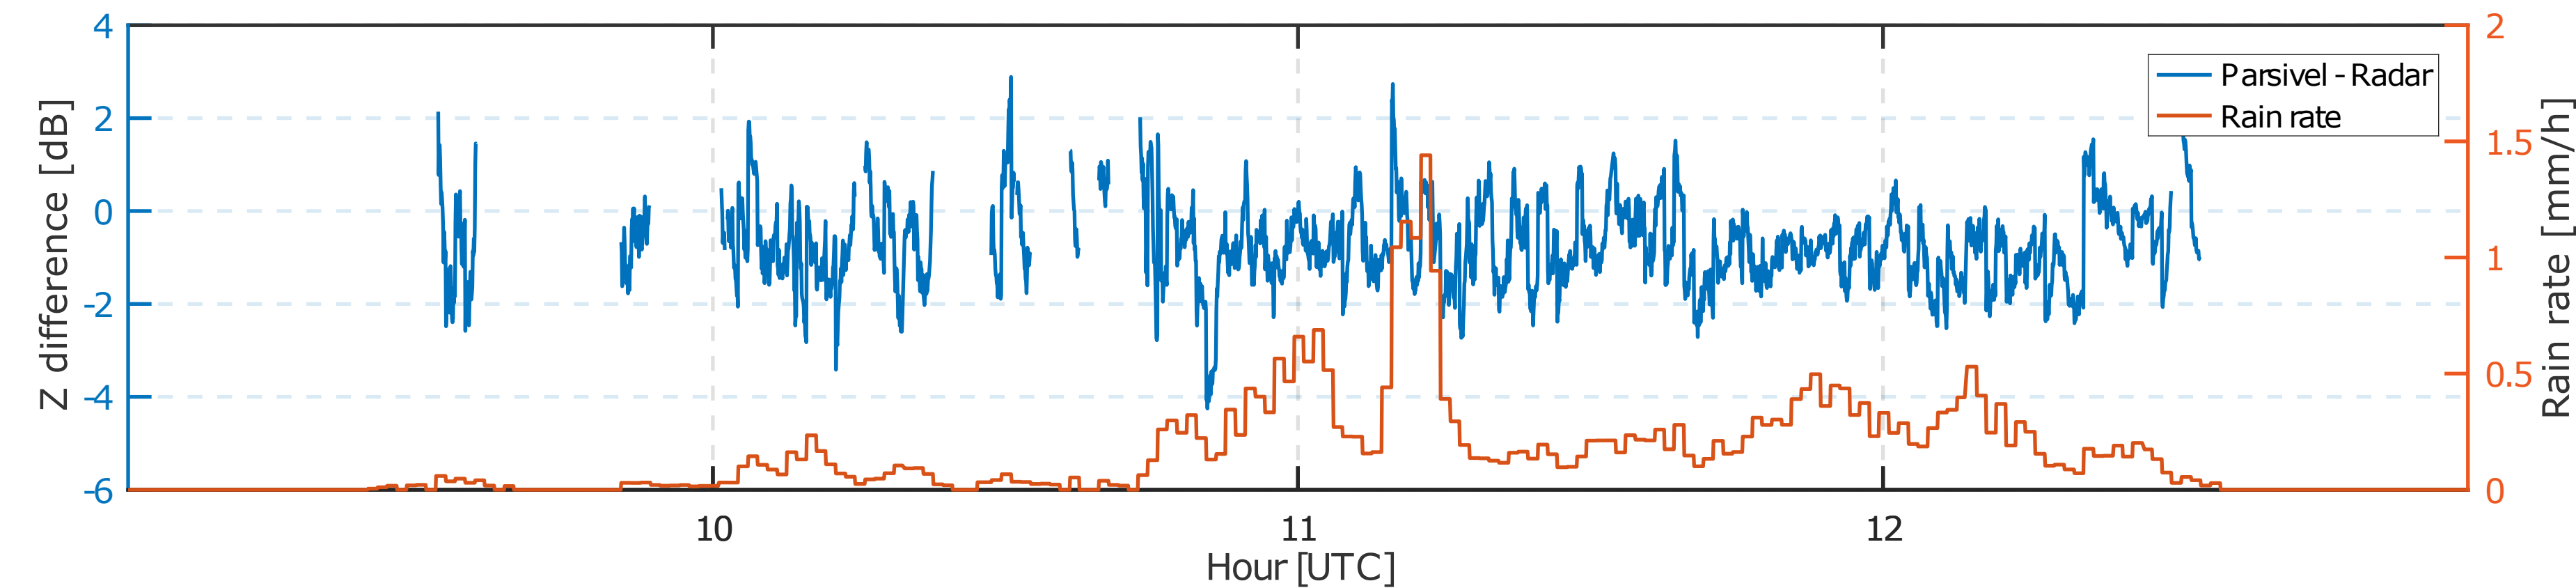

Supplement: Supplementary file 20 [file amt-2020-133-supplement.zip]

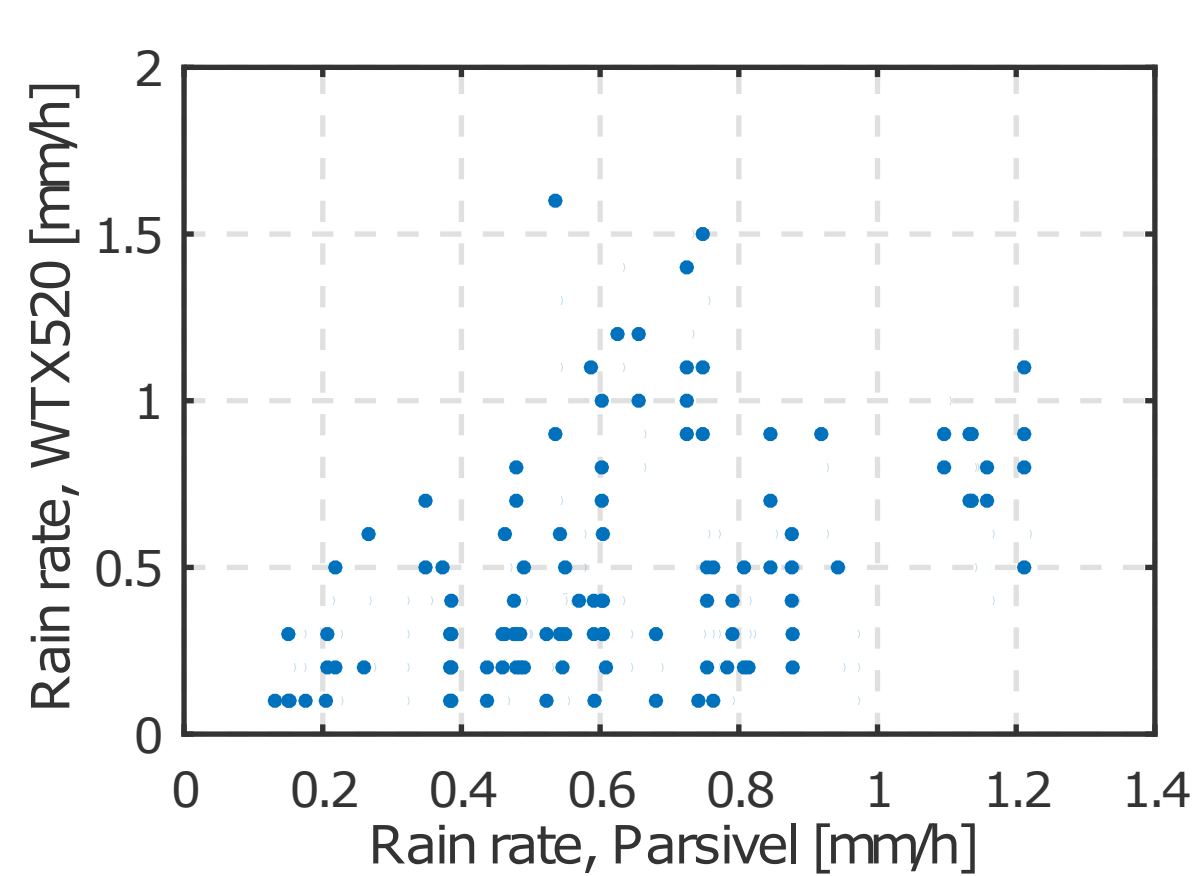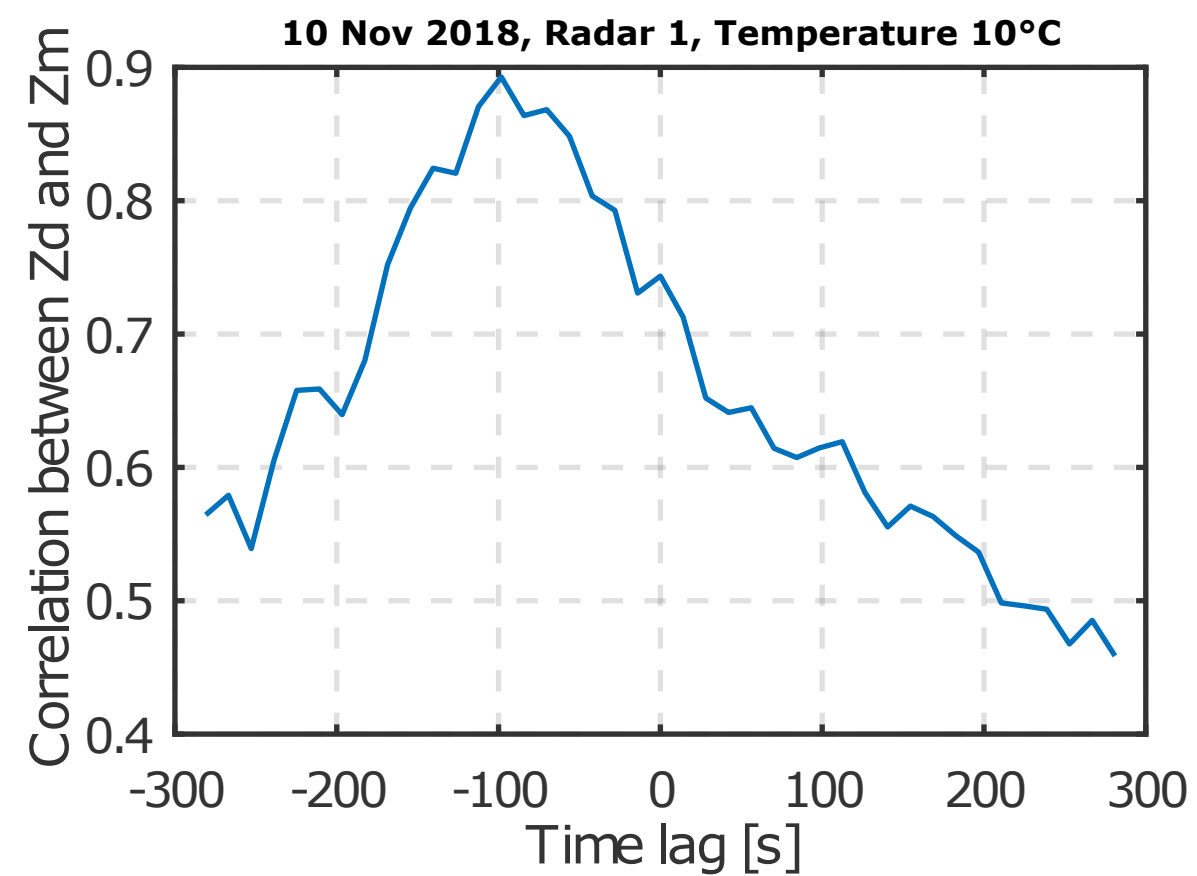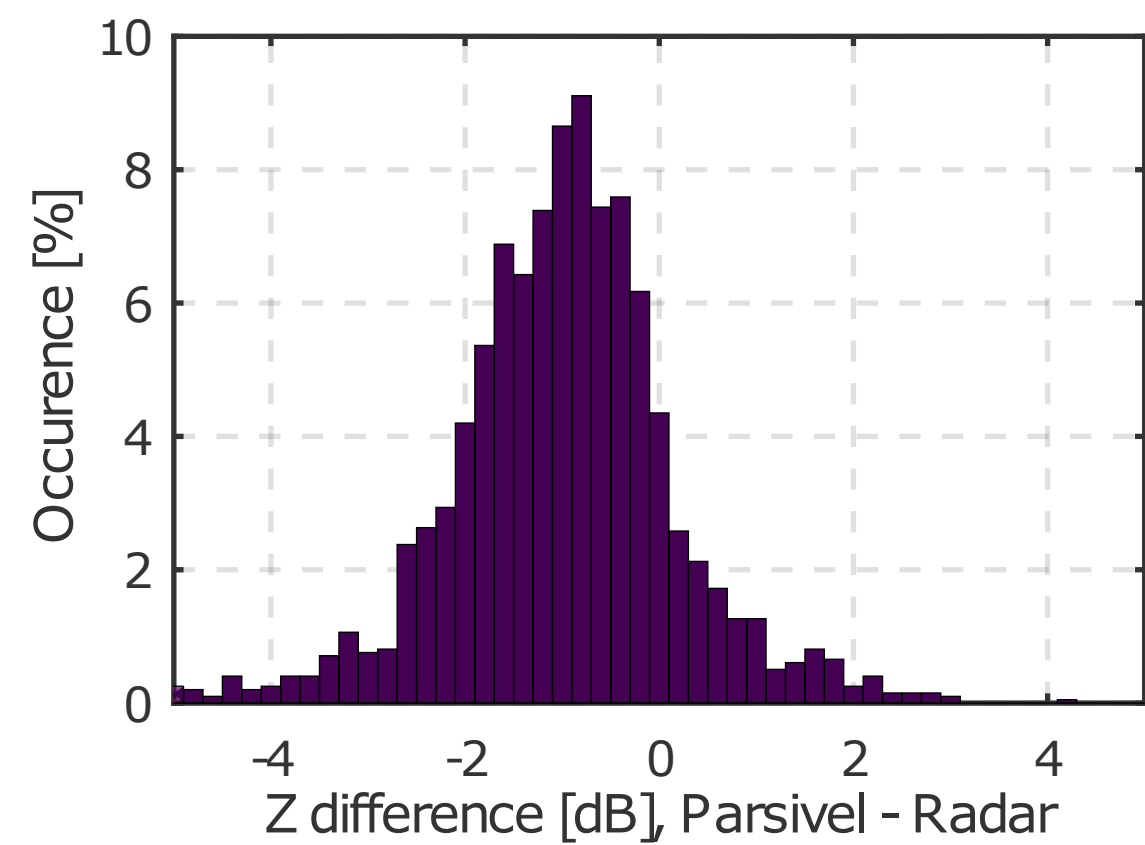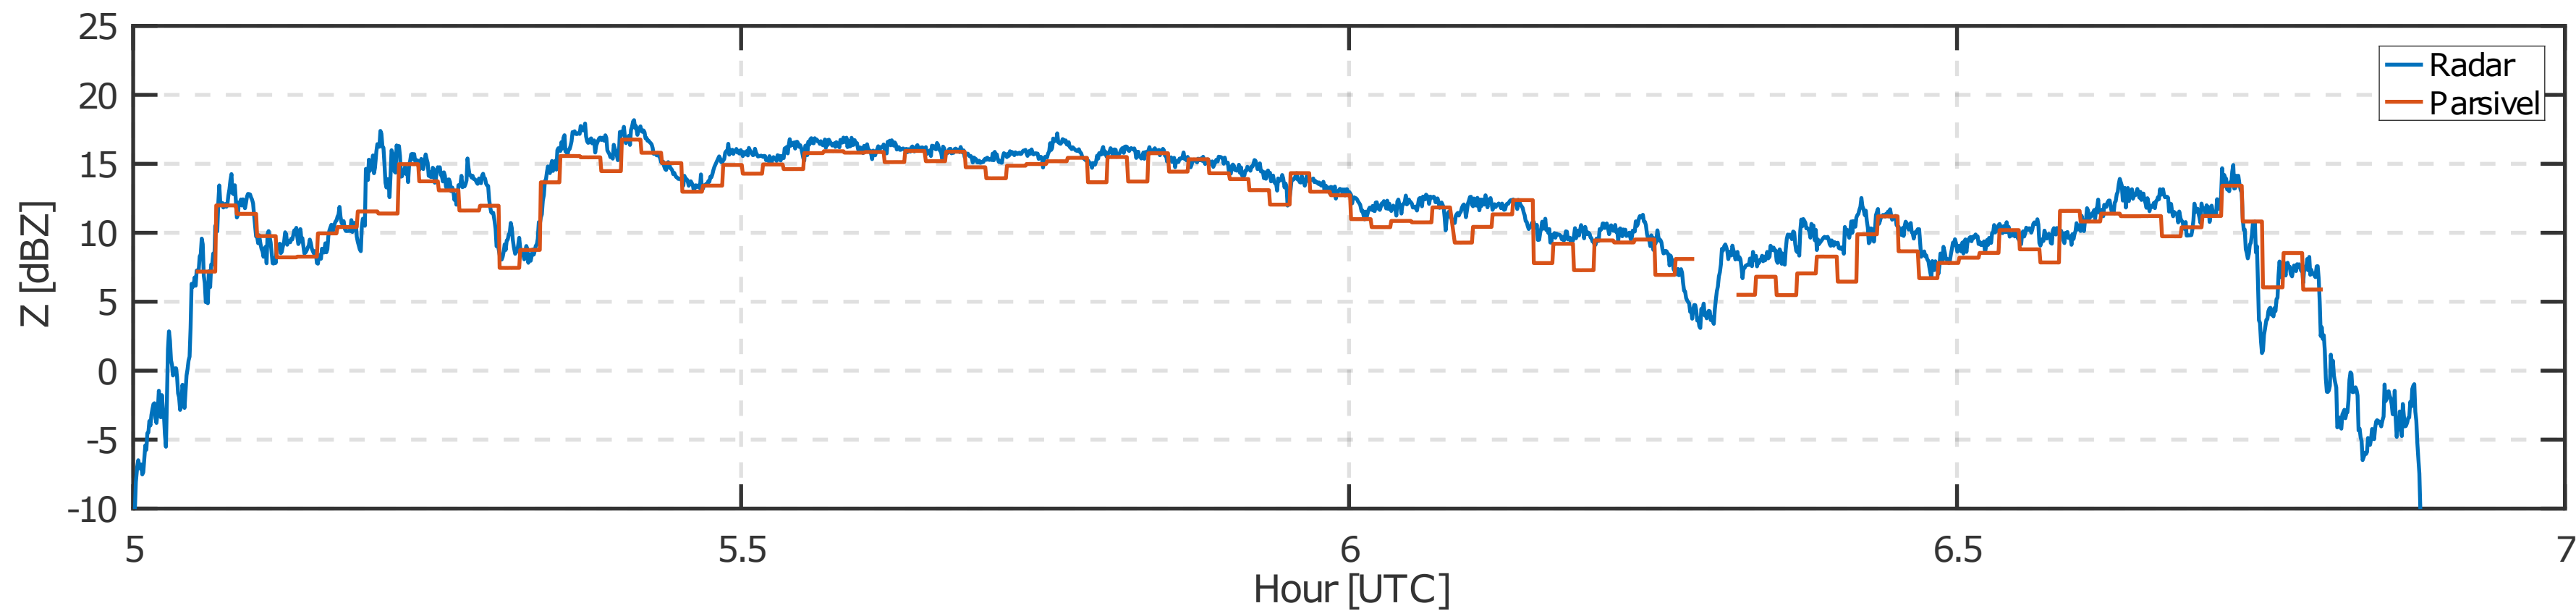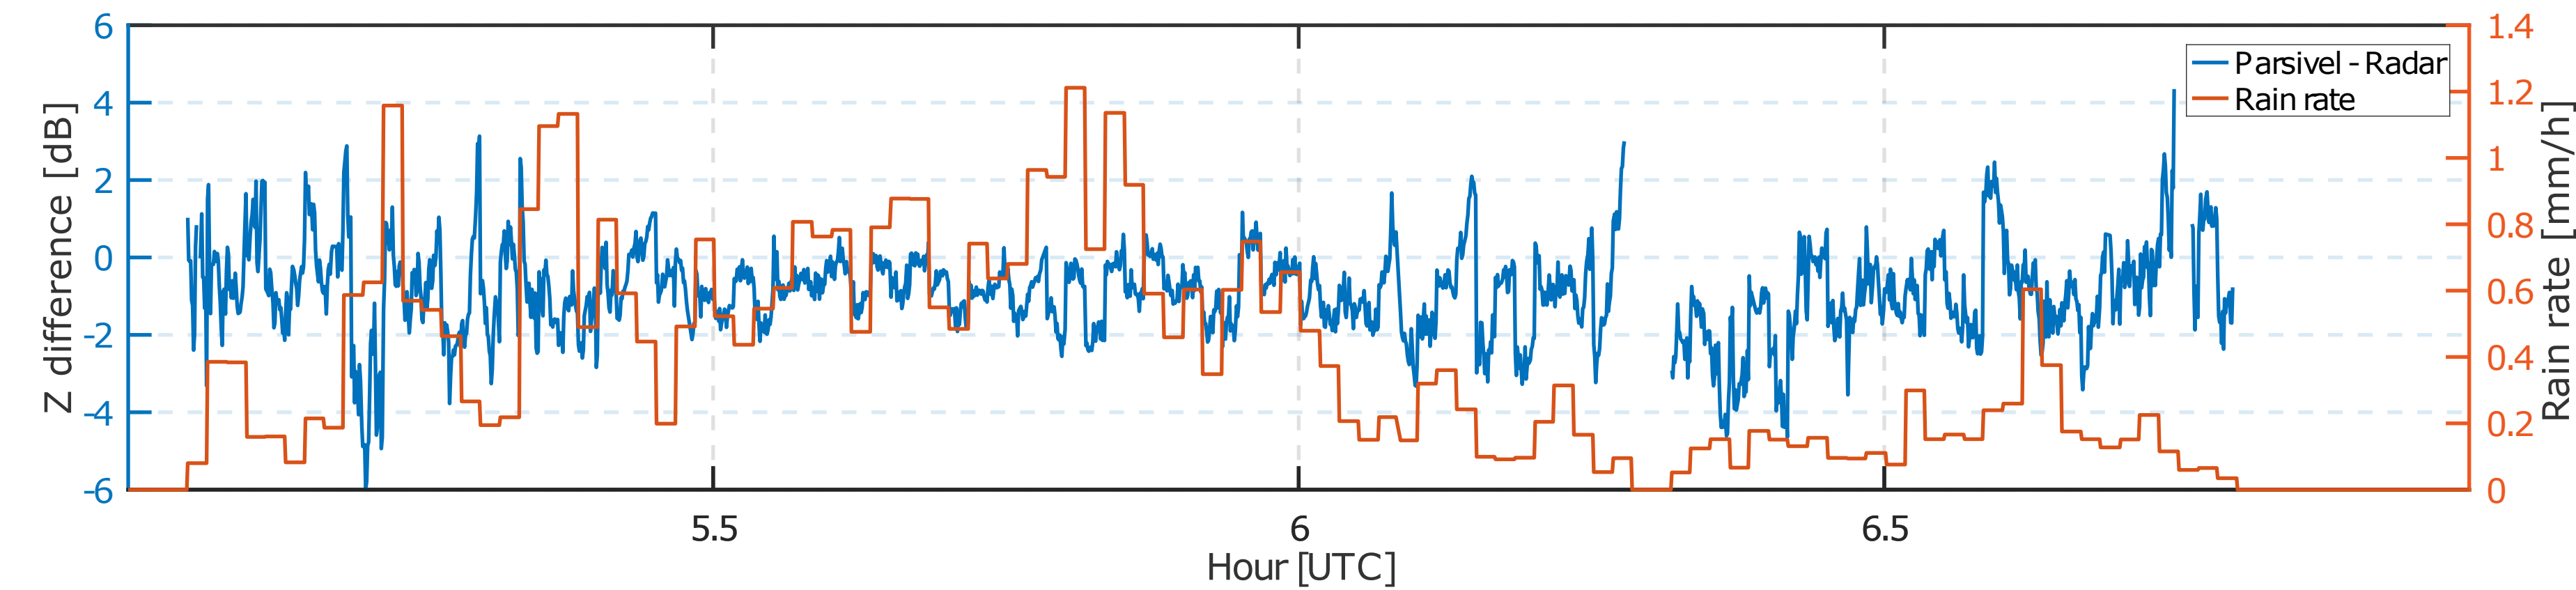

Supplement: Supplementary file 21 [file amt-2020-133-supplement.zip]

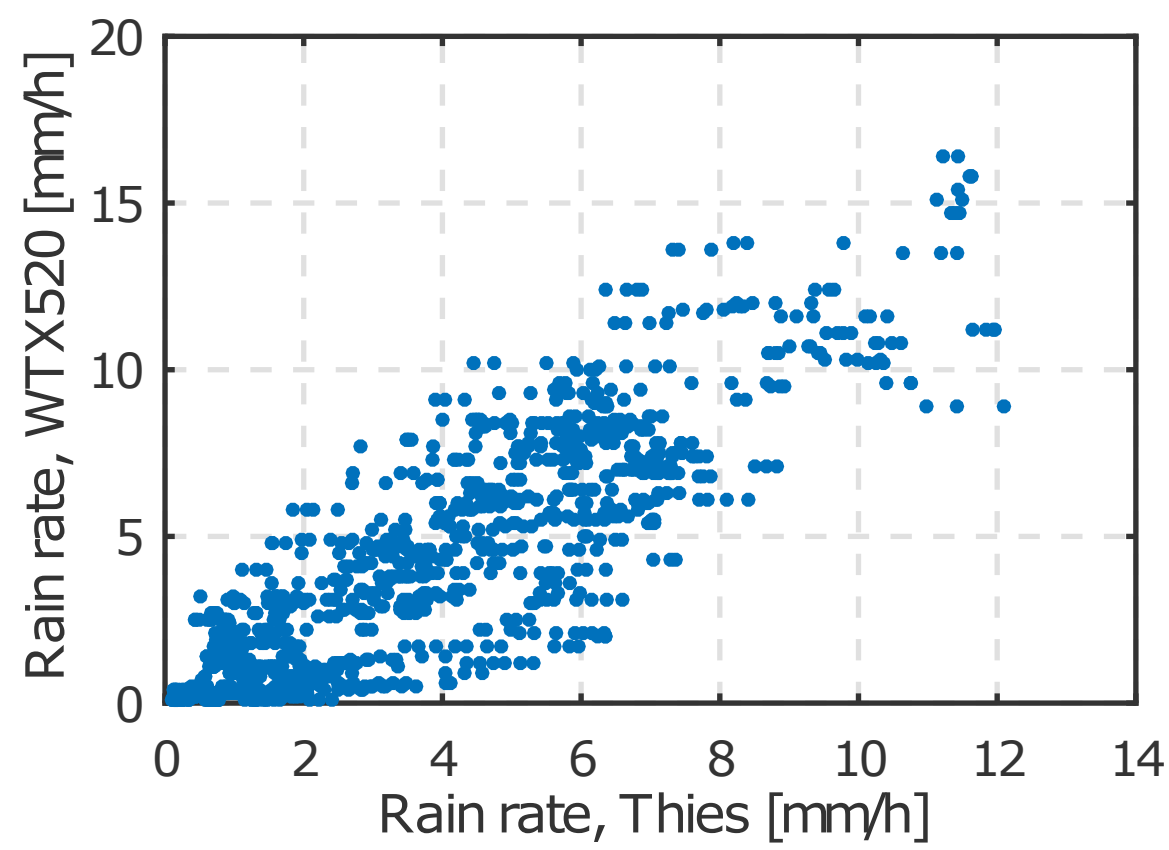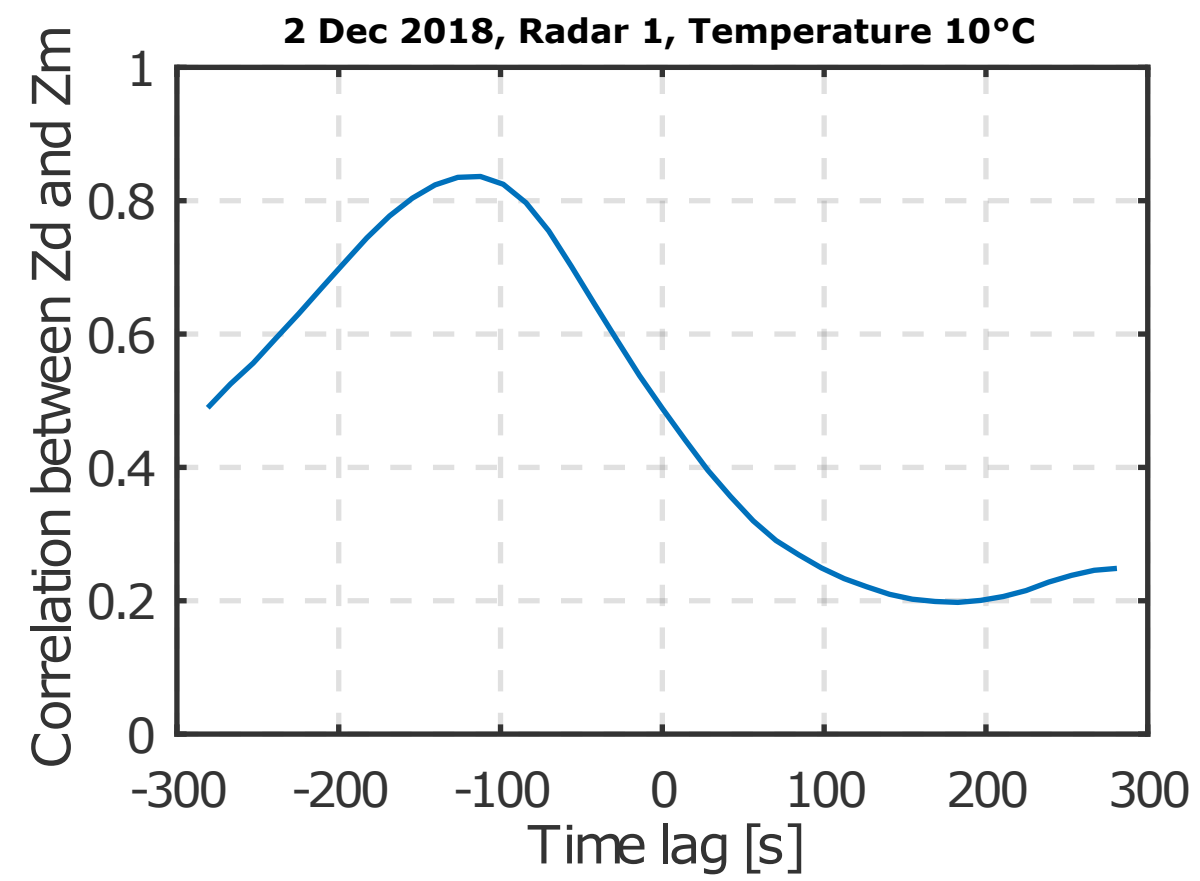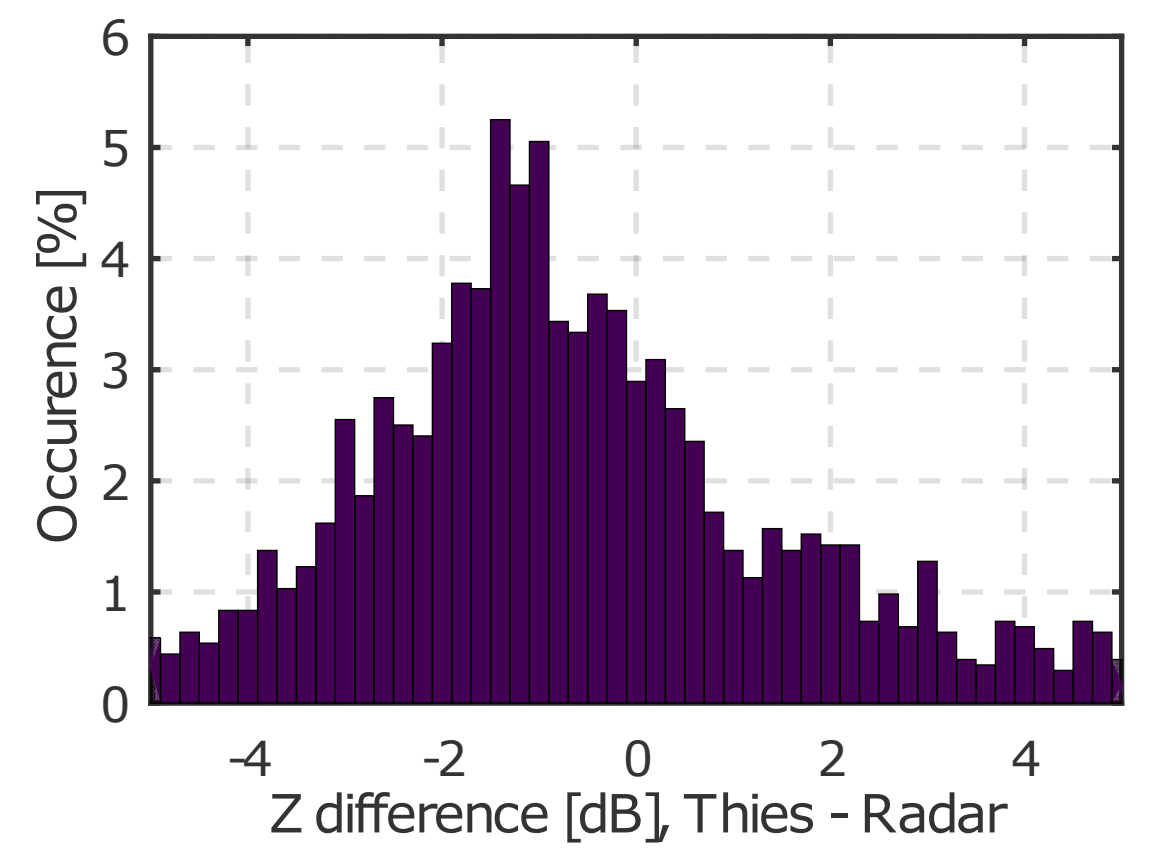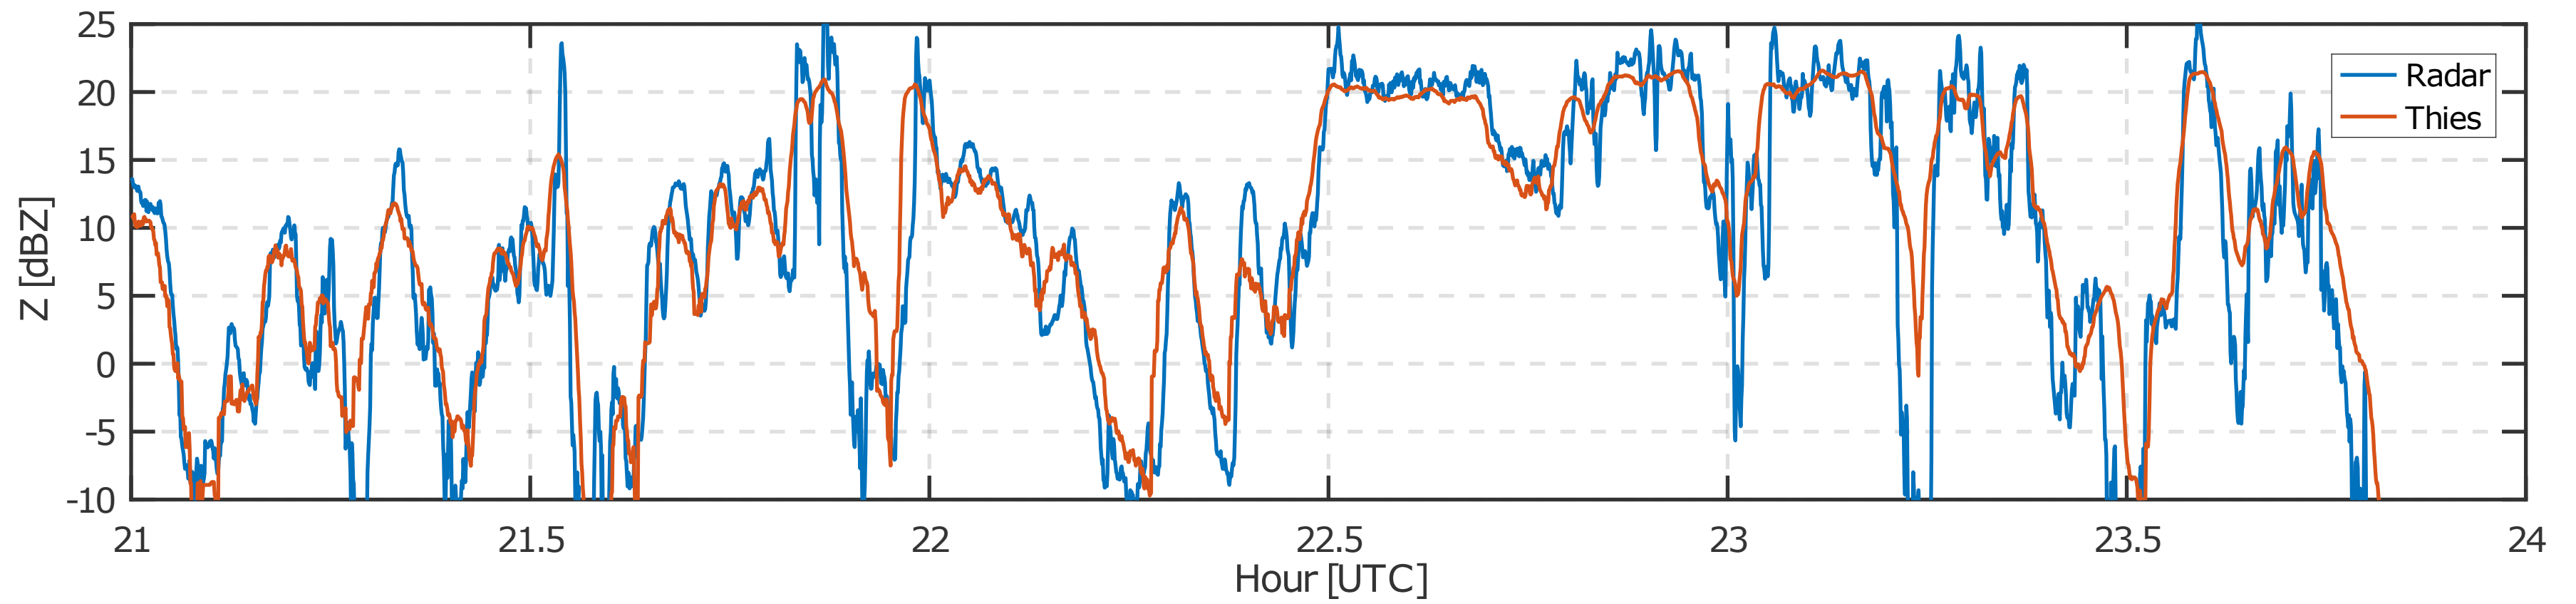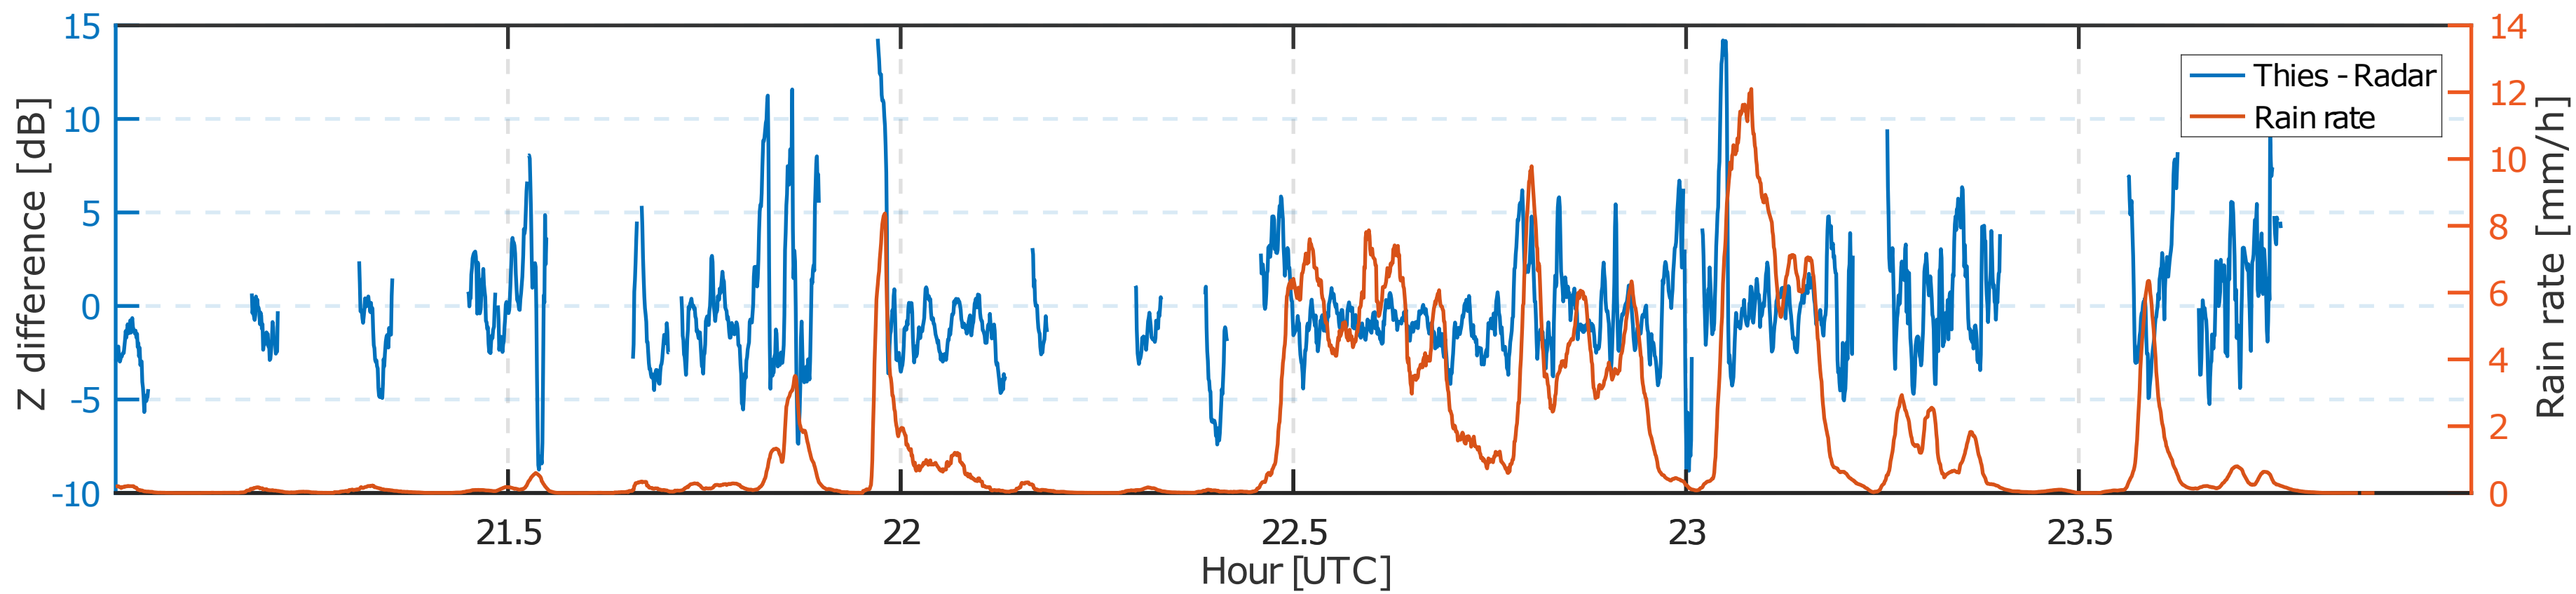

Supplement: Supplementary file 22 [file amt-2020-133-supplement.zip]

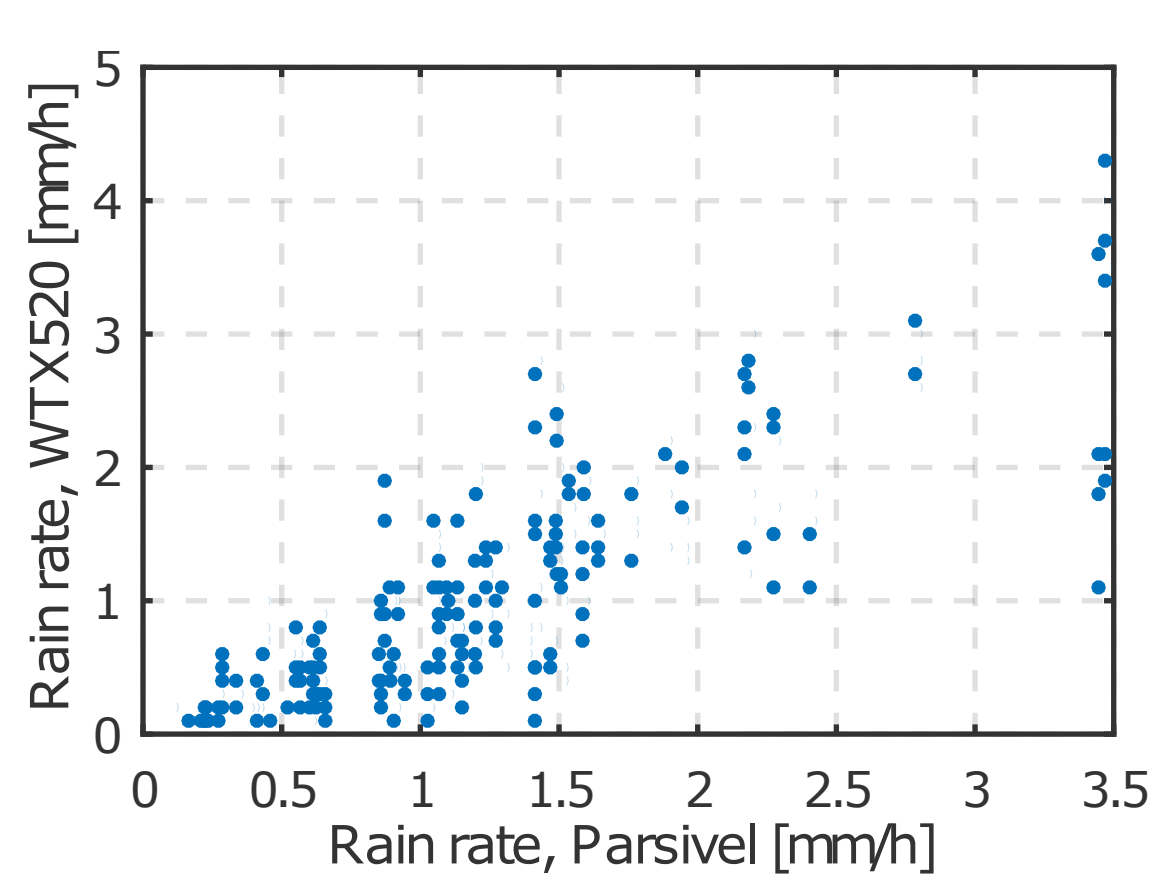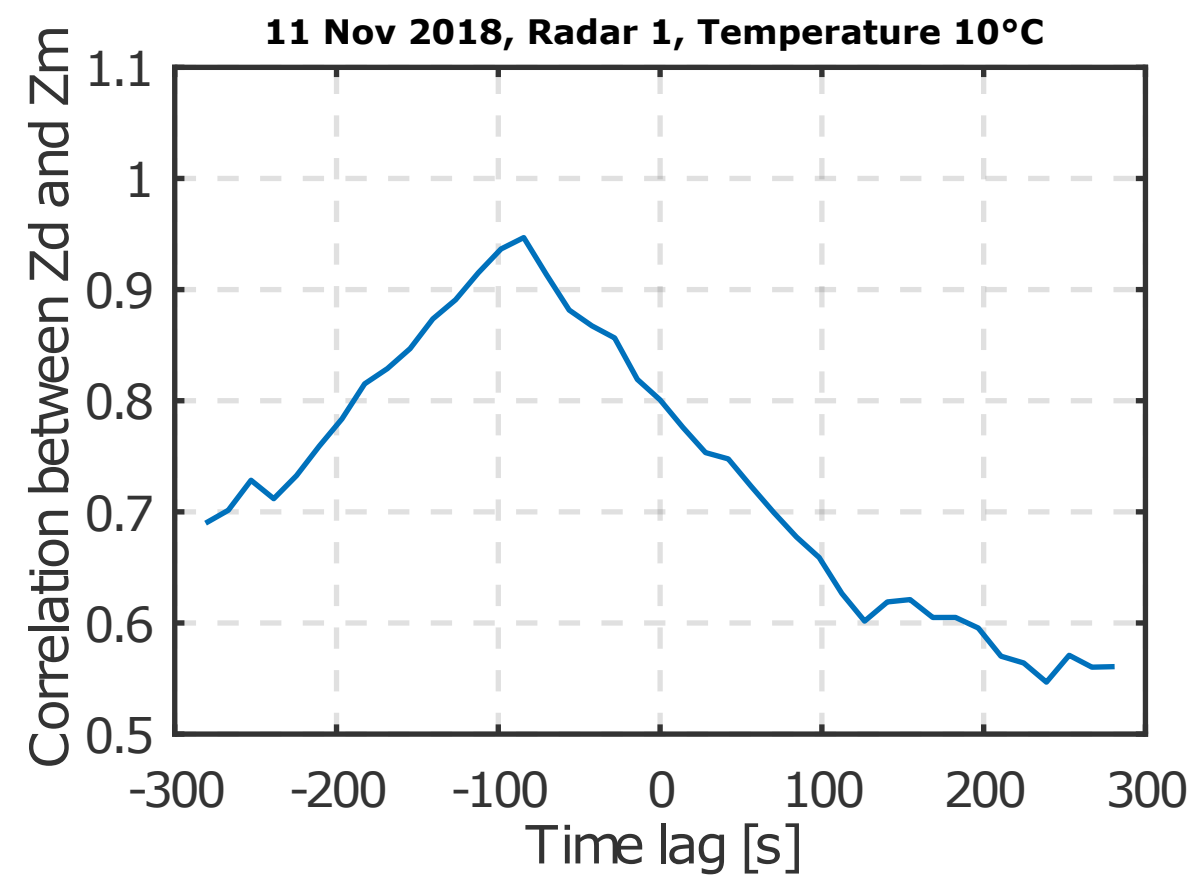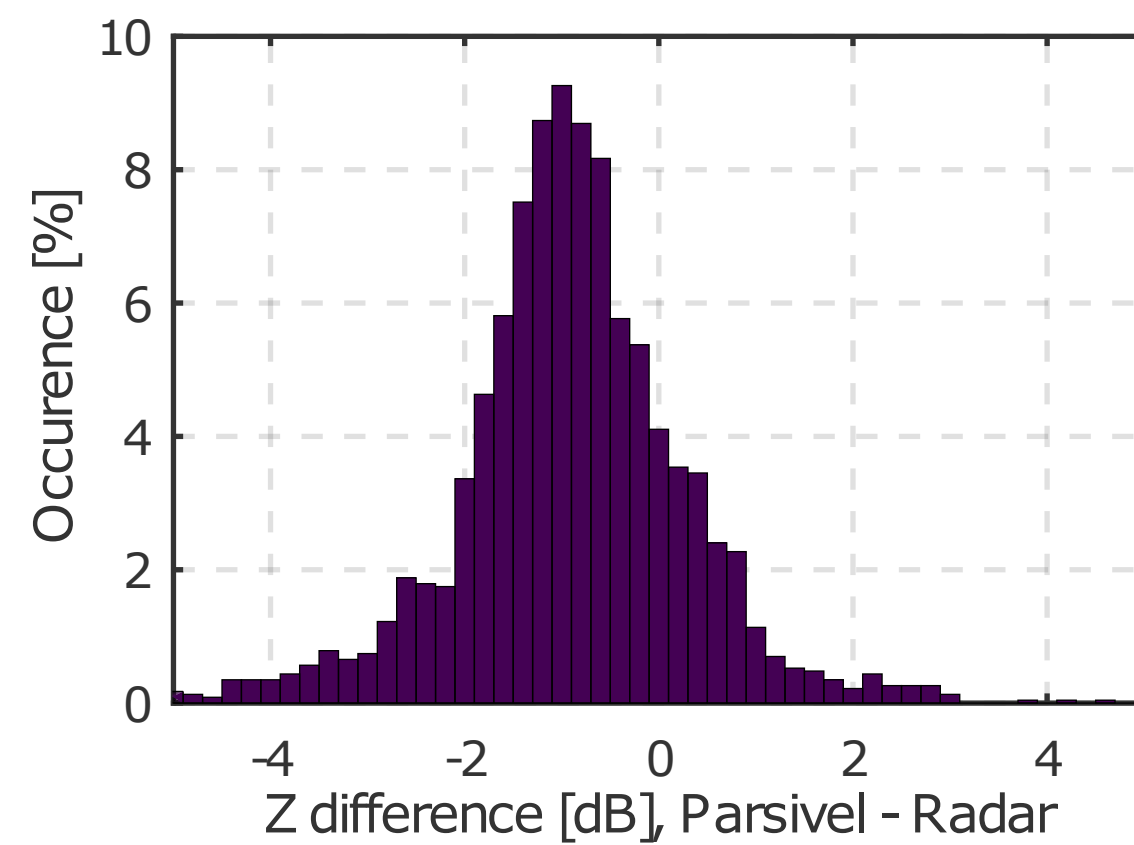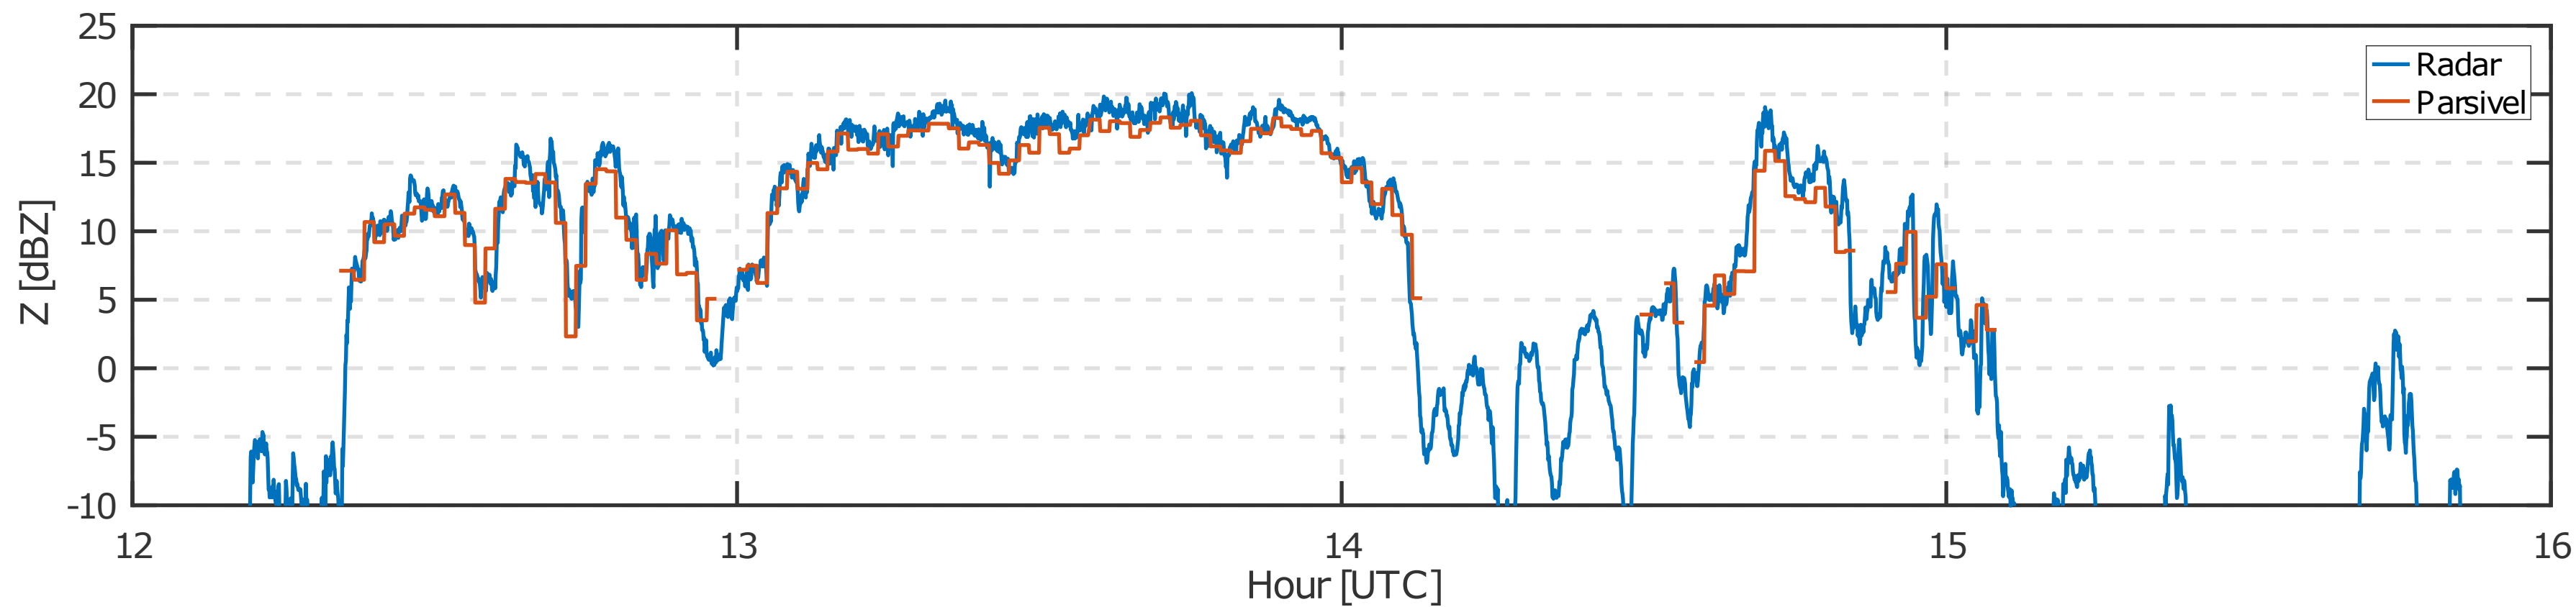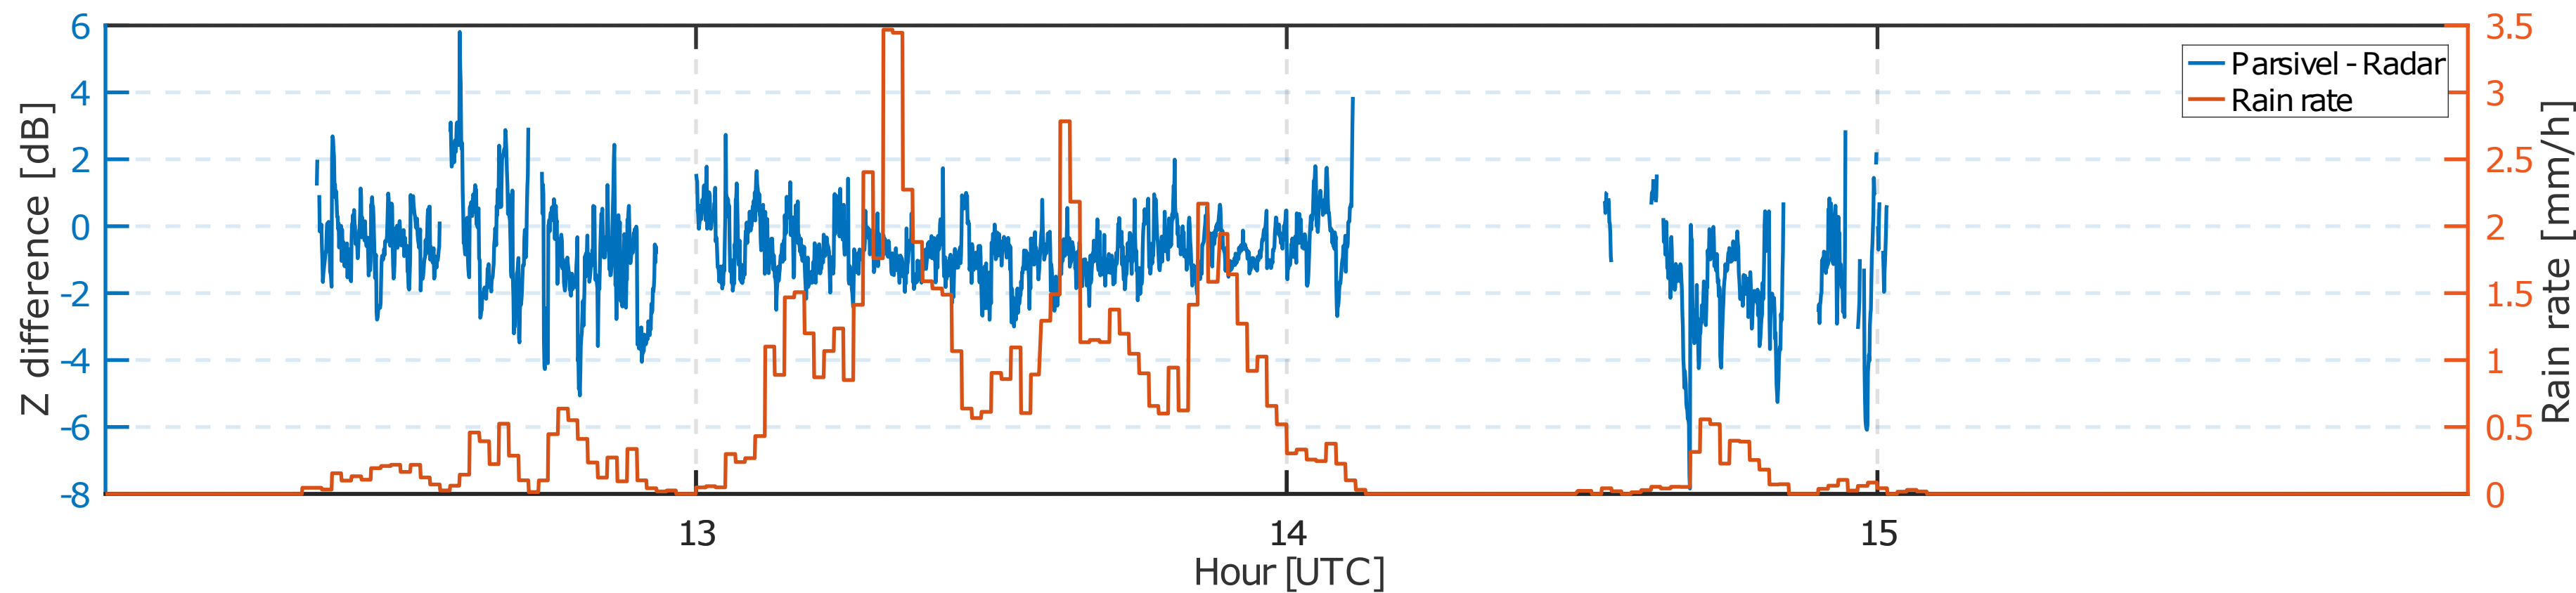

Supplement: Supplementary file 23 [file amt-2020-133-supplement.zip]

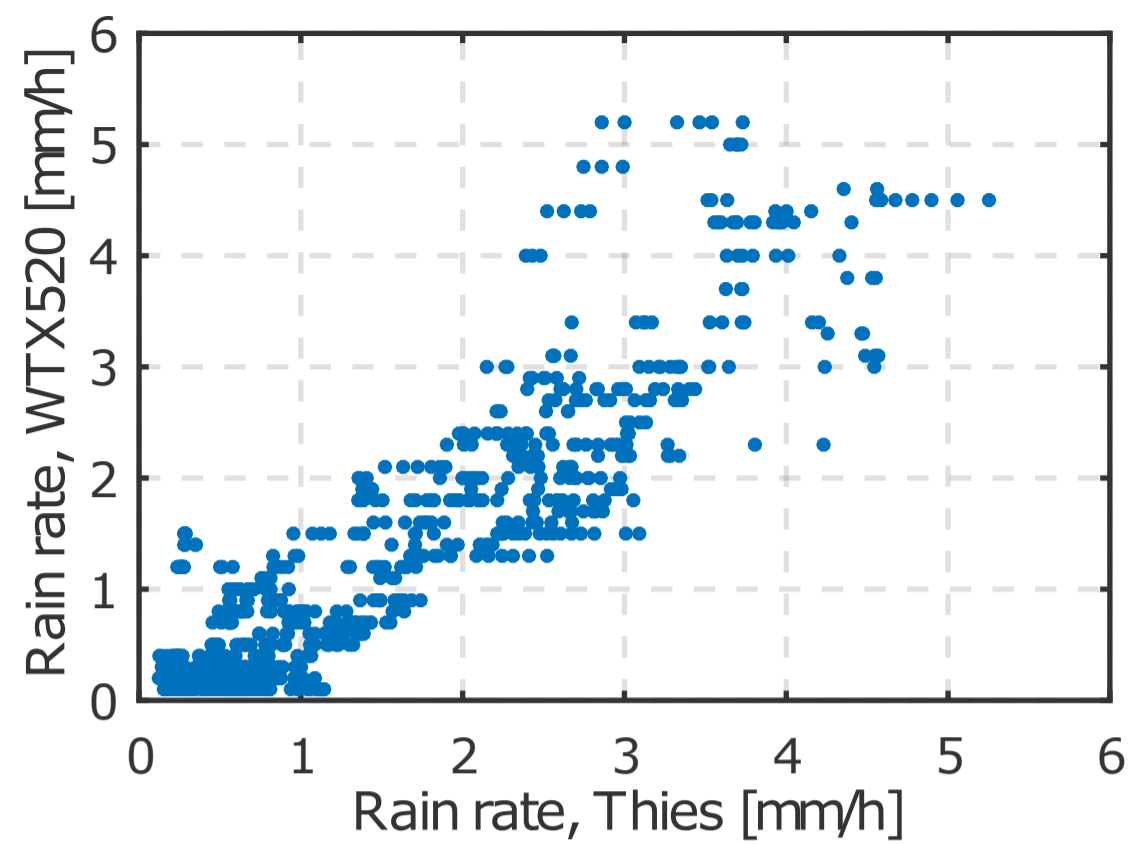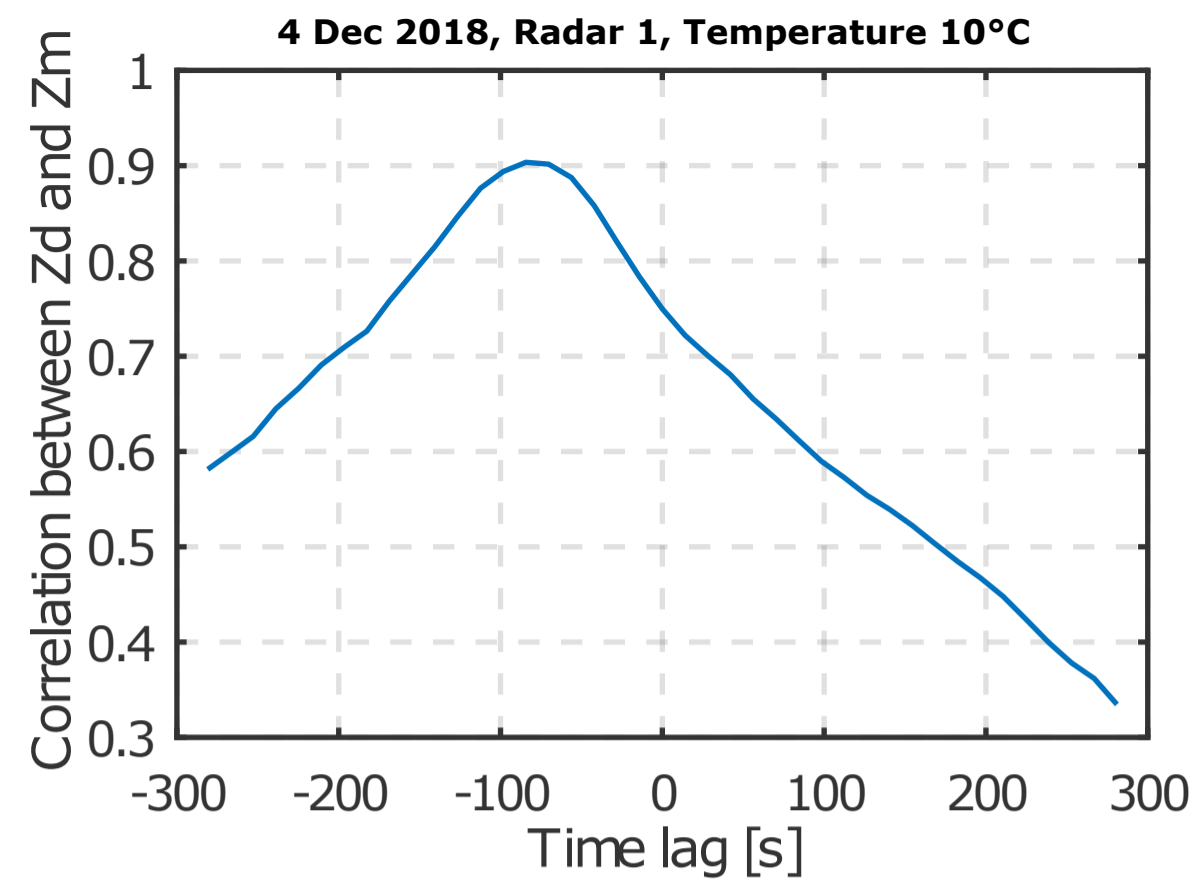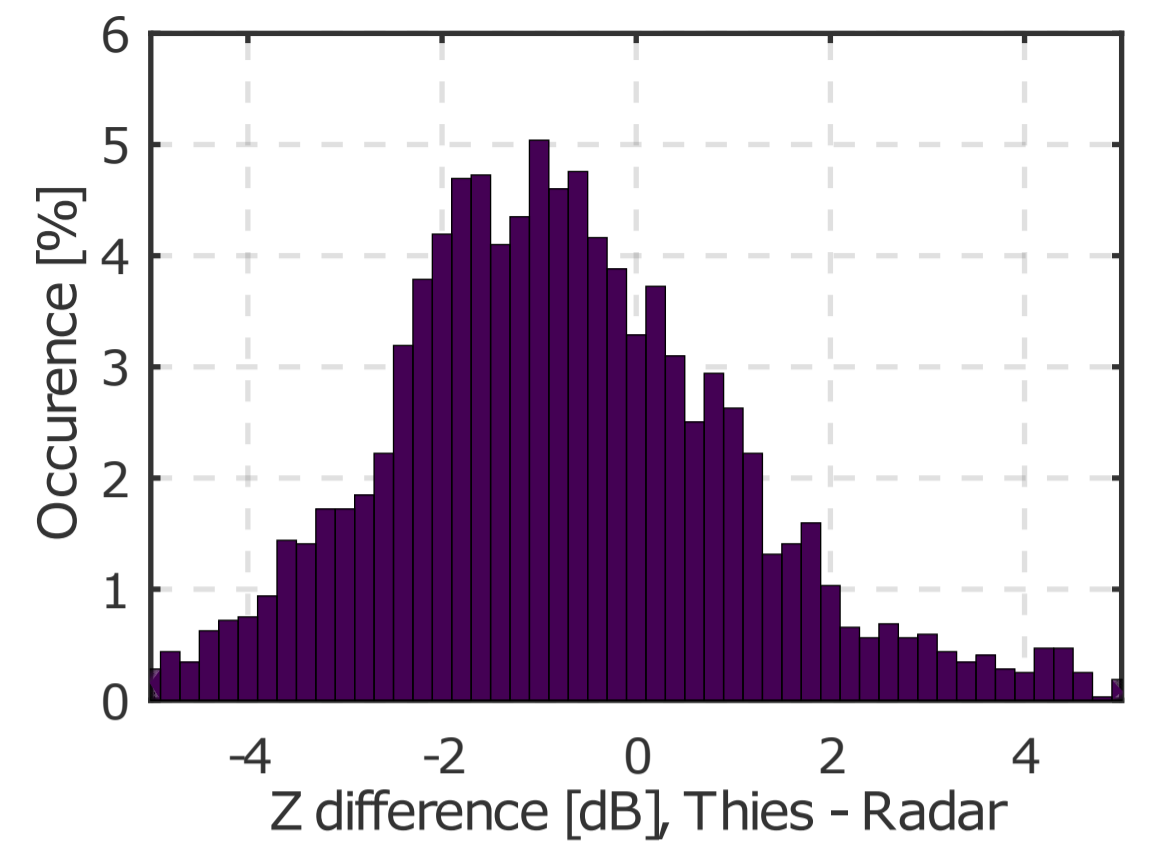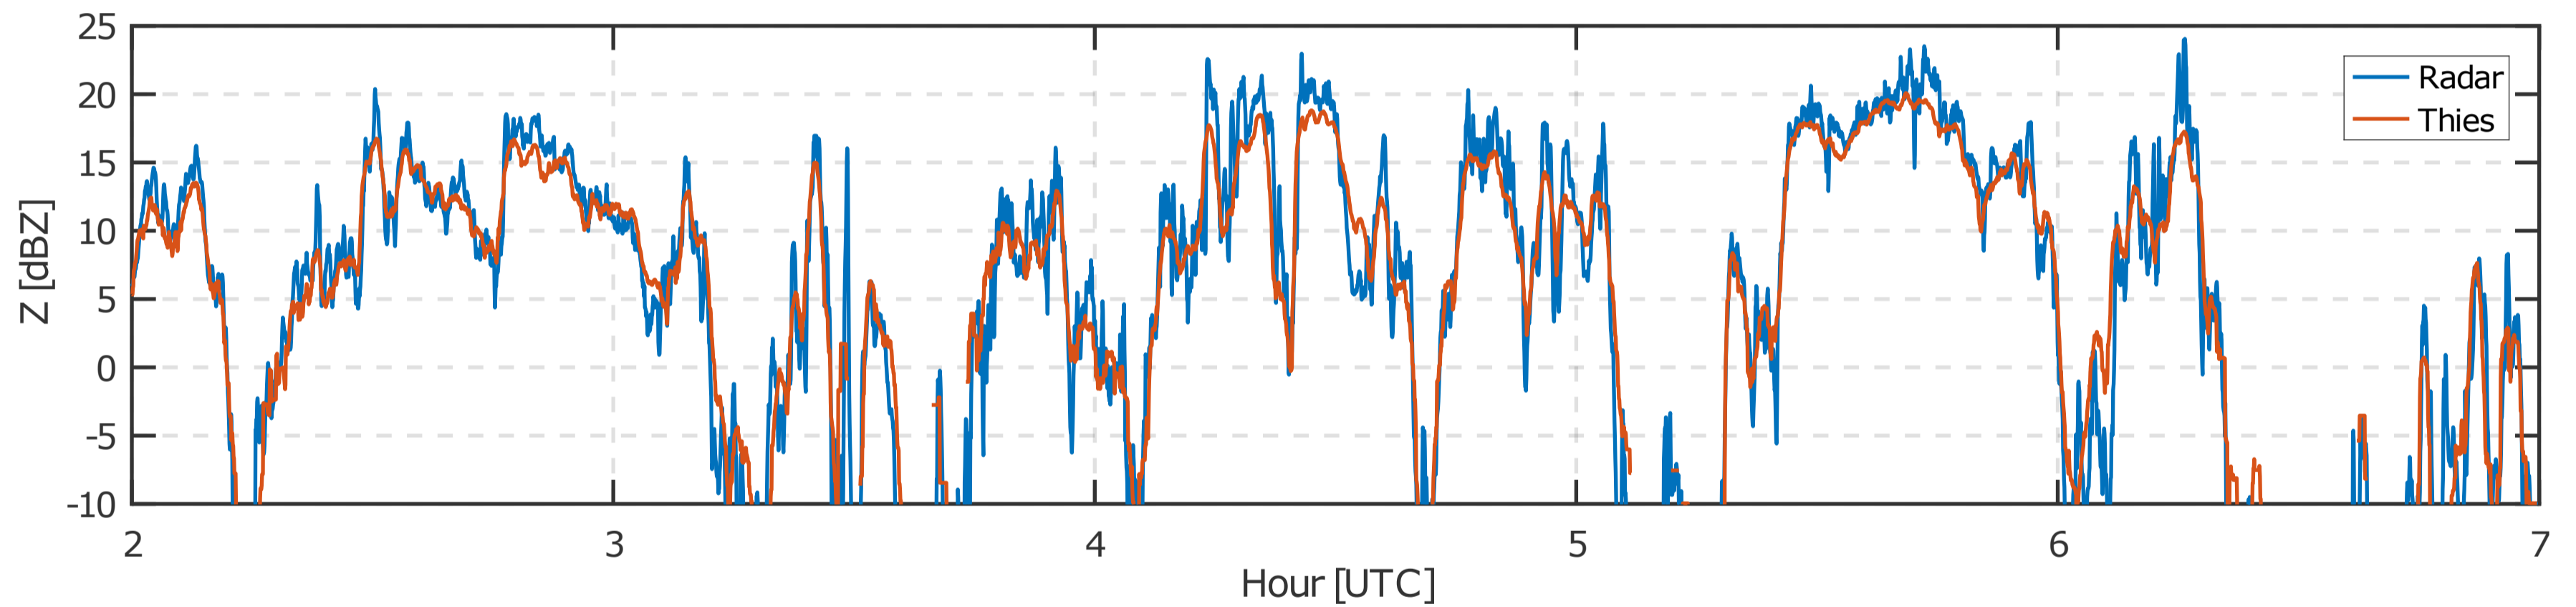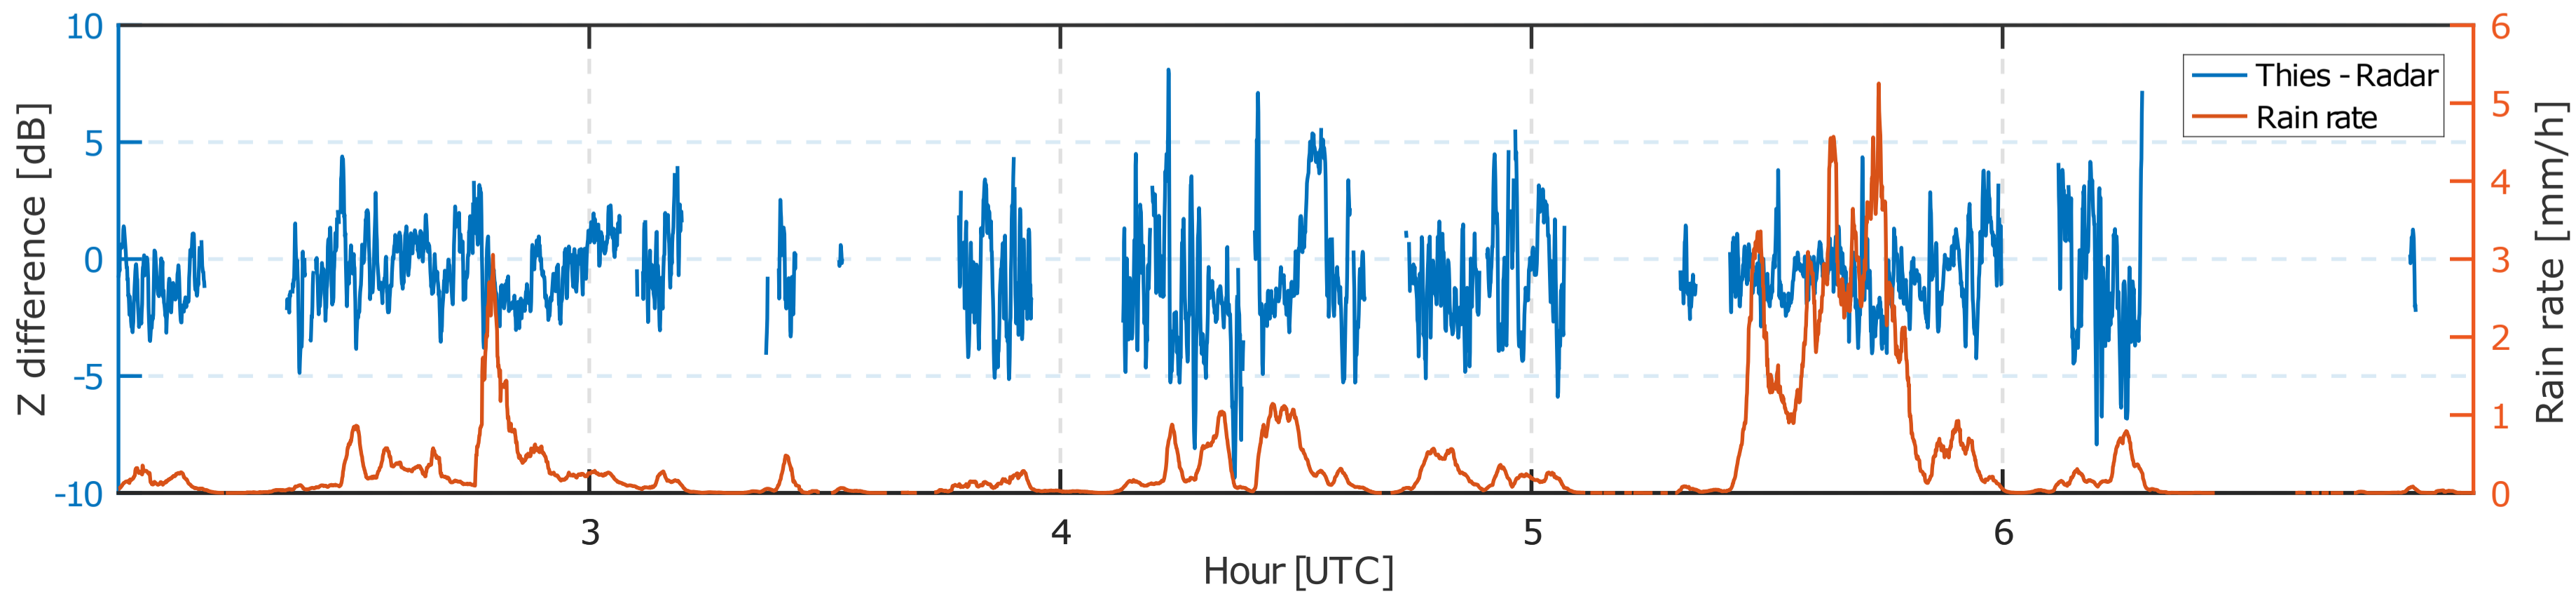

Supplement: Supplementary file 24 [file amt-2020-133-supplement.zip]
